# Supplementary material for: Loss function of tumor suppressor FRMD8 confers resistance to tamoxifen therapy via a dual mechanism
Source: eLife. 2025 Apr 11;13:RP101888. doi: 10.7554/eLife.101888 (PMC11991697; doi:10.7554/eLife.101888)
Supplement: Supplementary file 1. [file elife-101888-supp1.xlsx]

## Sheet: Sheet1
Supplementary file 1. Mass spectrometry (MS) analyses of HEK293A cells transiently expressing Flag-FRMD8
Accession	Description	ΣCoverage	Σ# Proteins	Σ# Unique Peptides	Σ# Peptides	Σ# PSMs	Score Flag	Coverage Flag	# Peptides Flag	# PSM Flag	Score Flag-FRMD8	Coverage Flag-FRMD8	# Peptides Flag-FRMD8	# PSM Flag-FRMD8	# AAs	MW [kDa]	calc. pI
Q24575	D.melanogaster ubiquitin (Fragment) OS=Drosophila melanogaster GN=Ubi-p63E PE=4 SV=1 - [Q24575_DROME]	97.37	21	1	14	175	289.855	94.74	12	93	285.195	81.58	10	82	76	8.53847	7.25439
Q562M3	Actin-like protein (Fragment) OS=Homo sapiens GN=ACT PE=4 SV=1 - [Q562M3_HUMAN]	91.26	33	1	5	77	167.768	45.63	3	42	133.165	85.44	4	35	103	11.5289	6.68311
Q24576	D.melanogaster ubiquitin (Fragment) OS=Drosophila melanogaster GN=Ubi-p63E PE=4 SV=1 - [Q24576_DROME]	90.67	11	1	13	169	271.602	80	10	88	279.38	82.67	10	81	75	8.42749	8.49951
A0A037YHU4	Universal stress protein G OS=Escherichia coli GN=uspG PE=3 SV=1 - [A0A037YHU4_ECOLX]	89.44	5	7	7	18	18.775	42.96	4	6	50.5905	76.06	6	12	142	15.9253	6.52197
Q9BZ67	FERM domain-containing protein 8 OS=Homo sapiens GN=FRMD8 PE=1 SV=1 - [FRMD8_HUMAN]	83.62	8	15	28	815	114.059	30.82	9	33	2866.57	83.62	28	782	464	51.1862	6.22705
Q562Z4	Actin-like protein (Fragment) OS=Homo sapiens GN=ACT PE=4 SV=1 - [Q562Z4_HUMAN]	83.5	18	1	5	33	60.9102	26.21	3	16	57.6187	77.67	4	17	103	11.548	7.57666
B5MC59	Replication protein A 14 kDa subunit OS=Homo sapiens GN=RPA3 PE=1 SV=1 - [B5MC59_HUMAN]	82.93	3	4	4	10	15.0736	54.88	3	5	18.2859	68.29	3	5	82	9.16459	4.53857
G1Q6D6	Uncharacterized protein OS=Myotis lucifugus PE=4 SV=1 - [G1Q6D6_MYOLU]	81.58	35	4	11	146	222.399	64.04	8	72	251.199	81.58	10	74	114	12.911	8.71924
Q96BS4	FBL protein (Fragment) OS=Homo sapiens GN=FBL PE=2 SV=2 - [Q96BS4_HUMAN]	78.46	27	12	15	95	149.677	65	13	45	161.287	76.92	14	50	260	28.4318	9.42236
E9PMI6	Methylosome subunit pICln OS=Homo sapiens GN=CLNS1A PE=1 SV=1 - [E9PMI6_HUMAN]	77.84	13	8	8	37	125.178	77.84	8	36	3.3924	7.78	1	1	167	18.2477	4.41162
H2RCK3	Uncharacterized protein OS=Pan troglodytes PE=4 SV=1 - [H2RCK3_PANTR]	73.52	15	6	68	1784	3321.6	70.22	58	781	3962.33	70.09	63	1003	759	84.062	5.89697
O00746	Nucleoside diphosphate kinase, mitochondrial OS=Homo sapiens GN=NME4 PE=1 SV=1 - [NDKM_HUMAN]	71.12	15	11	11	397	507.912	70.59	10	165	761.898	71.12	11	232	187	20.6456	10.2866
Q8H159	Polyubiquitin 10 OS=Arabidopsis thaliana GN=UBQ10 PE=2 SV=2 - [UBQ10_ARATH]	70.9	37	1	6	80	98.8586	70.9	6	50	52.1364	44.64	4	30	457	51.1745	7.60596
B4DW52	cDNA FLJ55253, highly similar to Actin, cytoplasmic 1 OS=Homo sapiens PE=2 SV=1 - [B4DW52_HUMAN]	70.89	118	1	20	220	412.124	62.54	19	119	344.488	62.82	15	101	347	38.6082	5.35107
R4GMP9	Lysine-specific histone demethylase 1A (Fragment) OS=Homo sapiens GN=KDM1A PE=1 SV=8 - [R4GMP9_HUMAN]	68.77	2	1	18	241	521.761	68.77	17	128	409.528	68.77	18	113	301	32.3916	8.25049
G1SEW1	Uncharacterized protein OS=Oryctolagus cuniculus GN=KDM1A PE=4 SV=1 - [G1SEW1_RABIT]	68.53	6	1	63	1609	2911.77	65.06	55	688	3656.13	64.44	58	921	807	88.8485	6.41748
E9PNN3	6-pyruvoyl tetrahydrobiopterin synthase OS=Homo sapiens GN=PTS PE=1 SV=1 - [E9PNN3_HUMAN]	67.53	5	4	4	7	22.2228	67.53	4	7					77	8.9075	4.71631
P35527	Keratin, type I cytoskeletal 9 OS=Homo sapiens GN=KRT9 PE=1 SV=3 - [K1C9_HUMAN]	66.93	4	31	32	388	767.949	66.93	32	191	765.228	61.96	28	197	623	62.0268	5.23682
I7GMW7	Macaca fascicularis brain cDNA clone: QflA-18652, similar to human ribosomal protein S3 (RPS3), mRNA, RefSeq: NM_001005.2 OS=Macaca fascicularis PE=2 SV=1 - [I7GMW7_MACFA]	66.67	31	18	18	74	68.9837	49.38	12	22	182.895	66.67	18	52	243	26.6875	9.65674
E9PKG1	Protein arginine N-methyltransferase 1 OS=Homo sapiens GN=PRMT1 PE=1 SV=1 - [E9PKG1_HUMAN]	66.46	35	14	22	92	186.434	65.54	21	55	116.848	45.23	14	37	325	37.6848	6.15088
A2NHM3	If kappa light chain (Fragment) OS=Mus musculus GN=Igkc PE=1 SV=1 - [A2NHM3_MOUSE]	63.93	27	5	15	413	791.126	63.93	15	234	601.025	56.16	12	179	219	24.1498	7.32764
P35908	Keratin, type II cytoskeletal 2 epidermal OS=Homo sapiens GN=KRT2 PE=1 SV=2 - [K22E_HUMAN]	63.69	16	26	34	361	686.978	63.69	34	201	527.498	61.66	31	160	639	65.3932	8.00146
A0A0A3U762	Uncharacterized protein OS=Escherichia coli GN=ACN87_12370 PE=4 SV=1 - [A0A0A3U762_ECOLX]	63.43	4	3	3	26	36.7534	31.34	2	8	85.0295	63.43	3	18	134	13.7562	6.06201
H2QSG9	Histone H4 OS=Pan troglodytes PE=3 SV=1 - [H2QSG9_PANTR]	62.63	53	11	11	201	296.102	48.48	9	97	289.822	59.6	9	104	99	11.0422	11.356
G1PJ98	Enhancer of rudimentary homolog OS=Myotis lucifugus PE=3 SV=1 - [G1PJ98_MYOLU]	61.17	9	3	3	12	33.3005	61.17	3	10	7.48087	16.5	1	2	103	12.12	5.92236
Q32Q12	Nucleoside diphosphate kinase OS=Homo sapiens GN=NME1-NME2 PE=1 SV=1 - [Q32Q12_HUMAN]	60.62	34	10	10	53	64.9288	47.26	7	21	97.6355	60.62	10	32	292	32.6209	8.48486
E9PRP1	FERM domain-containing protein 8 (Fragment) OS=Homo sapiens GN=FRMD8 PE=1 SV=1 - [E9PRP1_HUMAN]	59.35	2	1	8	76	8.09136	7.1	1	3	194.921	59.35	8	73	155	17.1568	5.21143
F8W1N5	Nascent polypeptide-associated complex subunit alpha (Fragment) OS=Homo sapiens GN=NACA PE=1 SV=1 - [F8W1N5_HUMAN]	59.15	19	3	3	7	11.7069	59.15	3	3	13.1496	38.03	2	4	71	7.80827	9.62744
H0Y711	Methylosome protein 50 (Fragment) OS=Homo sapiens GN=WDR77 PE=1 SV=1 - [H0Y711_HUMAN]	58.76	2	2	9	139	323.574	58.76	9	134	15.8533	29.55	4	5	291	31.0781	4.89404
O95881	Thioredoxin domain-containing protein 12 OS=Homo sapiens GN=TXNDC12 PE=1 SV=1 - [TXD12_HUMAN]	58.72	6	3	7	91	104.601	58.72	7	37	178.601	58.72	7	54	172	19.1936	5.40186
H6VRF8	Keratin 1 OS=Homo sapiens GN=KRT1 PE=3 SV=1 - [H6VRF8_HUMAN]	58.7	41	1	37	555	932.565	57.14	35	280	900.197	54.66	33	275	644	66.013	8.11865
H6VRG2	Keratin 1 OS=Homo sapiens GN=KRT1 PE=3 SV=1 - [H6VRG2_HUMAN]	58.7	34	0	36	516	868.557	55.75	34	258	846.156	54.66	32	258	644	66.026	8.11865
Q8CGP6	Histone H2A type 1-H OS=Mus musculus GN=Hist1h2ah PE=1 SV=3 - [H2A1H_MOUSE]	58.59	74	1	6	40	60.6288	51.56	5	16	87.5301	44.53	3	24	128	13.9418	11.0337
K9IGA5	Histone H2A OS=Desmodus rotundus PE=2 SV=1 - [K9IGA5_DESRO]	58.59	87	1	6	43	68.8085	51.56	5	19	87.5301	44.53	3	24	128	13.8838	10.8872
Q9BTQ7	Similar to ribosomal protein L23 (Fragment) OS=Homo sapiens PE=2 SV=1 - [Q9BTQ7_HUMAN]	58.21	29	6	6	89	51.1383	39.55	3	20	168.816	58.21	6	69	134	14.1407	10.2573
G2HGD5	Methylosome protein 50 OS=Pan troglodytes GN=WDR77 PE=2 SV=1 - [G2HGD5_PANTR]	57.31	7	1	14	163	381.519	57.31	14	157	19.9845	17.54	4	6	342	36.6871	5.17334
G1T0Z2	Histone H2A OS=Oryctolagus cuniculus GN=HIST1H2AA PE=3 SV=1 - [G1T0Z2_RABIT]	57.25	92	0	6	19	21.2123	50.38	5	8	36.4444	46.56	3	11	131	14.2129	11.1802
H0UUL7	Uncharacterized protein OS=Cavia porcellus GN=SPIN1 PE=4 SV=1 - [H0UUL7_CAVPO]	56.96	20	9	9	28	76.8073	56.96	9	22	15.994	28.7	4	6	230	26.2791	5.52881
H2QCX3	Uncharacterized protein OS=Pan troglodytes GN=KRT10 PE=3 SV=1 - [H2QCX3_PANTR]	56.85	59	13	31	663	1219.5	56.85	31	373	987.425	49.91	24	290	577	58.2444	5.16064
B0AZM0	cDNA, FLJ79460, highly similar to Voltage-gated potassium channel subunitbeta-2 OS=Homo sapiens PE=2 SV=1 - [B0AZM0_HUMAN]	56.81	18	3	14	150	249.833	56.81	14	69	304.681	54.49	13	81	345	38.742	8.88037
D5FZW3	Beta globin (Fragment) OS=Homo sapiens PE=3 SV=1 - [D5FZW3_HUMAN]	56.1	79	1	2	5	8.4192	56.1	2	3	5.36089	24.39	1	2	41	4.5474	5.8335
A5A6N1	Actin, gamma 1 OS=Pan troglodytes verus GN=actg1 PE=2 SV=1 - [A5A6N1_PANTR]	55.91	102	1	18	178	292.599	55.91	18	95	261.67	44.36	12	83	381	42.4792	6.07471
G1PIU5	40S ribosomal protein S4 OS=Myotis lucifugus GN=RPS4X PE=3 SV=1 - [G1PIU5_MYOLU]	55.89	30	14	14	70	91.4385	44.49	11	29	119.915	55.89	14	41	263	29.5931	10.1548
P62263	40S ribosomal protein S14 OS=Homo sapiens GN=RPS14 PE=1 SV=3 - [RS14_HUMAN]	55.63	16	3	5	34	31.936	29.14	4	11	86.79	55.63	5	23	151	16.2625	10.0522
G1TRL8	Uncharacterized protein OS=Oryctolagus cuniculus GN=SNRPD1 PE=4 SV=1 - [G1TRL8_RABIT]	55.56	11	3	5	52	118.94	55.56	5	37	47.6127	55.56	4	15	117	13.1122	11.4292
Q562V5	Actin-like protein (Fragment) OS=Homo sapiens GN=ACT PE=4 SV=1 - [Q562V5_HUMAN]	55.34	18	1	4	32	63.5566	55.34	4	17	57.0776	49.51	3	15	103	11.4238	6.354
Q8WUH6	Transmembrane protein 263 OS=Homo sapiens GN=TMEM263 PE=1 SV=1 - [TM263_HUMAN]	55.17	6	4	4	10	16.2693	38.79	3	5	15.822	46.55	3	5	116	11.7411	9.31982
Q14558	Phosphoribosyl pyrophosphate synthase-associated protein 1 OS=Homo sapiens GN=PRPSAP1 PE=1 SV=2 - [KPRA_HUMAN]	54.78	15	11	13	45	129.108	54.78	13	43	6.11921	3.93	1	2	356	39.3686	7.1958
B8JKY9	Small nuclear ribonucleoprotein D1 polypeptide (Fragment) OS=Danio rerio GN=snrpd1 PE=1 SV=1 - [B8JKY9_DANRE]	54.74	6	1	3	31	68.9169	54.74	3	23	21.9391	33.68	2	8	95	10.7398	9.43701
G1PQ64	Histone H2A OS=Myotis lucifugus GN=H2AFV PE=3 SV=1 - [G1PQ64_MYOLU]	54.33	61	3	5	33	39.086	47.24	4	14	57.9536	48.82	4	19	127	13.3695	10.5796
H2R114	Keratin 19 OS=Pan troglodytes GN=KRT19 PE=2 SV=1 - [H2R114_PANTR]	53.75	55	10	17	52	52.9822	31.5	12	24	72.6085	49.25	14	28	400	44.0921	5.13525
B7ZAF0	Tubulin beta chain OS=Homo sapiens PE=2 SV=1 - [B7ZAF0_HUMAN]	53.25	151	6	16	40	52.1501	32.53	9	15	86.3275	51.08	14	25	415	46.5365	4.93213
F8W1R7	Myosin light polypeptide 6 OS=Homo sapiens GN=MYL6 PE=1 SV=1 - [F8W1R7_HUMAN]	53.1	52	7	7	53	78.8698	46.9	6	25	86.0875	53.1	7	28	145	16.2798	4.65283
P05387	60S acidic ribosomal protein P2 OS=Homo sapiens GN=RPLP2 PE=1 SV=1 - [RLA2_HUMAN]	53.04	4	4	4	19	33.7655	53.04	4	10	32.9013	53.04	4	9	115	11.6578	4.53857
Q9BTZ2	Dehydrogenase/reductase SDR family member 4 OS=Homo sapiens GN=DHRS4 PE=1 SV=3 - [DHRS4_HUMAN]	52.16	28	7	12	249	315.701	41.01	11	113	429.48	52.16	12	136	278	29.5184	8.55811
Q04837	Single-stranded DNA-binding protein, mitochondrial OS=Homo sapiens GN=SSBP1 PE=1 SV=1 - [SSBP_HUMAN]	52.03	26	8	8	82	143.708	47.97	7	41	122.485	48.65	6	41	148	17.249	9.59814
B2RA03	cDNA, FLJ94640, highly similar to Homo sapiens keratin 18 (KRT18), mRNA OS=Homo sapiens PE=2 SV=1 - [B2RA03_HUMAN]	51.86	40	15	17	48	12.0362	6.51	3	8	140.389	50.23	16	40	430	48.0005	5.37646
C9JIR6	Protein phosphatase 1B (Fragment) OS=Homo sapiens GN=PPM1B PE=1 SV=1 - [C9JIR6_HUMAN]	51.85	36	15	15	72	239.738	51.85	15	66	19.8811	15.61	4	6	378	41.8033	5.35107
I7G8E2	Macaca fascicularis brain cDNA clone: QmoA-11427, similar to human Siah-interacting protein (SIP), mRNA, RefSeq: NM_014412.1 OS=Macaca fascicularis PE=2 SV=1 - [I7G8E2_MACFA]	51.35	7	2	2	3					11.846	51.35	2	3	74	8.36833	8.45557
K7EJT5	60S ribosomal protein L22 (Fragment) OS=Homo sapiens GN=RPL22 PE=1 SV=1 - [K7EJT5_HUMAN]	51.06	14	2	2	7	12.3607	51.06	2	4	8.48515	51.06	2	3	47	5.07968	9.42236
A0A0M4KM70	Monoclonal 11D8 anti-human butyrylcholinesterase (BChE) heavy chain OS=Mus musculus PE=2 SV=1 - [A0A0M4KM70_MOUSE]	50.98	2	20	20	727	1121.51	50.98	19	340	1310.37	45.08	18	387	457	50.2628	7.15186
Q02978	Mitochondrial 2-oxoglutarate/malate carrier protein OS=Homo sapiens GN=SLC25A11 PE=1 SV=3 - [M2OM_HUMAN]	50.96	13	12	12	27	17.3632	33.12	7	7	58.9213	50.96	12	20	314	34.0399	9.90576
A0A024R3X7	Heat shock 10kDa protein 1 (Chaperonin 10), isoform CRA_d OS=Homo sapiens GN=HSPE1 PE=3 SV=1 - [A0A024R3X7_HUMAN]	50.7	17	3	3	4	2.0577	14.08	1	1	8.78748	36.62	2	3	71	7.53603	6.68311
G1U001	Uncharacterized protein OS=Oryctolagus cuniculus GN=RPL38 PE=1 SV=1 - [G1U001_RABIT]	50	12	5	5	57	80.1876	50	5	25	104.546	50	5	32	70	8.19868	10.0522
B4DY09	Interleukin enhancer-binding factor 2 OS=Homo sapiens GN=ILF2 PE=1 SV=1 - [B4DY09_HUMAN]	49.15	12	14	14	54	96.4599	46.31	13	28	87.9738	34.38	10	26	352	38.8862	4.94482
Q1L8Q7	Ribosomal protein L30 OS=Danio rerio GN=rpl30 PE=1 SV=1 - [Q1L8Q7_DANRE]	48.96	14	4	4	15	5.28696	11.46	1	2	27.6837	48.96	4	13	96	10.6494	9.24658
Q52L64	ENSMUSG00000076577 protein OS=Mus musculus GN=Igkv8-30 PE=1 SV=1 - [Q52L64_MOUSE]	48.75	10	1	12	342	654.586	48.75	12	189	515.19	41.67	10	153	240	26.5918	6.31592
G1SW67	Core histone macro-H2A OS=Oryctolagus cuniculus GN=H2AFY PE=4 SV=2 - [G1SW67_RABIT]	48.64	8	11	14	64	75.6414	48.37	13	22	153.561	47.83	12	42	368	39.0611	9.80322
Q6TXQ4	H3L-like histone (Fragment) OS=Homo sapiens PE=1 SV=1 - [Q6TXQ4_HUMAN]	48.6	32	1	3	13	10.5576	40.19	2	4	26.6143	38.32	2	9	107	12.0967	10.5942
G1PGL3	Histone H2A OS=Myotis lucifugus GN=HIST2H2AB PE=3 SV=1 - [G1PGL3_MYOLU]	48.57	14	1	4	27	35.9696	42.14	3	9	77.8463	43.57	3	18	140	15.1334	10.8872
A8K9C4	Elongation factor 1-alpha OS=Homo sapiens PE=2 SV=1 - [A8K9C4_HUMAN]	48.48	165	9	14	71	52.8664	17.53	7	15	192.274	48.48	13	56	462	50.1691	9.01221
A0A024L0P3	Bifunctional polymyxin resistance protein ArnA OS=Escherichia coli GN=arnA PE=3 SV=1 - [A0A024L0P3_ECOLX]	48.18	21	28	28	195	281.684	43.64	23	71	506.346	44.85	23	124	660	74.2421	6.87354
B8XGK3	Histone H3 (Fragment) OS=Pediculus humanus capitis GN=H3 PE=3 SV=1 - [B8XGK3_9NEOP]	47.71	44	1	3	47	53.9246	39.45	2	10	191.735	37.61	2	37	109	12.2868	10.8286
P07355	Annexin A2 OS=Homo sapiens GN=ANXA2 PE=1 SV=2 - [ANXA2_HUMAN]	47.49	35	16	16	50	84.2239	47.49	16	28	75.9632	44.84	14	22	339	38.5798	7.75244
P02754	Beta-lactoglobulin OS=Bos taurus GN=LGB PE=1 SV=3 - [LACB_BOVIN]	47.19	1	6	6	30	37.8024	38.76	4	12	53.5692	47.19	6	18	178	19.8703	5.021
G3V1A4	Cofilin 1 (Non-muscle), isoform CRA_a OS=Homo sapiens GN=CFL1 PE=1 SV=1 - [G3V1A4_HUMAN]	46.98	21	5	5	10	6.32928	16.78	2	2	27.9742	46.98	5	8	149	16.8008	8.35303
Q86V81	THO complex subunit 4 OS=Homo sapiens GN=ALYREF PE=1 SV=3 - [THOC4_HUMAN]	46.69	9	9	9	161	324.338	46.69	9	87	274.906	46.69	9	74	257	26.8716	11.1509
W1Y8U7	Uncharacterized protein (Fragment) OS=human gut metagenome GN=Q604_UNBC07744G0001 PE=4 SV=1 - [W1Y8U7_9ZZZZ]	46.67	5	1	1	1					3.12037	46.67	1	1	30	3.21674	7.25439
Q3TGR2	Fibrinogen, B beta polypeptide, isoform CRA_a OS=Mus musculus GN=Fgb PE=1 SV=1 - [Q3TGR2_MOUSE]	46.36	10	17	17	74	145.82	43.24	16	40	121.276	36.8	13	34	481	54.7177	7.07861
P63241	Eukaryotic translation initiation factor 5A-1 OS=Homo sapiens GN=EIF5A PE=1 SV=2 - [IF5A1_HUMAN]	46.1	13	4	4	11	12.4226	30.52	3	4	24.4874	46.1	4	7	154	16.8214	5.23682
P04080	Cystatin-B OS=Homo sapiens GN=CSTB PE=1 SV=2 - [CYTB_HUMAN]	45.92	6	3	3	6	3.00601	12.24	1	1	14.9042	45.92	3	5	98	11.1326	7.56201
Q08CA5	Phosphoribosyl pyrophosphate synthetase 1B OS=Danio rerio GN=prps1b PE=1 SV=1 - [Q08CA5_DANRE]	45.91	12	1	13	45	106.007	45.91	13	37	17.1836	17.92	4	8	318	34.778	6.97607
O75319	RNA/RNP complex-1-interacting phosphatase OS=Homo sapiens GN=DUSP11 PE=1 SV=1 - [DUS11_HUMAN]	45.76	6	12	12	32	59.567	38.48	10	19	36.1504	29.7	8	13	330	38.9145	9.40771
A0A0N4V691	Uncharacterized protein OS=Enterobius vermicularis PE=3 SV=2 - [A0A0N4V691_ENTVE]	45.67	76	1	13	112	173.939	38.06	12	59	153.792	36.48	9	53	381	42.6505	6.15088
G1TU78	Uncharacterized protein OS=Oryctolagus cuniculus PE=4 SV=1 - [G1TU78_RABIT]	44.98	39	7	9	52	72.408	37.55	7	20	116.461	42.79	8	32	229	25.5786	8.74854
H3BR27	RNA-binding motif protein, X chromosome OS=Homo sapiens GN=RBMX PE=1 SV=1 - [H3BR27_HUMAN]	44.87	33	3	3	9	10.6424	28.21	2	4	15.4982	44.87	3	5	78	8.60437	5.49072
P50454	Serpin H1 OS=Homo sapiens GN=SERPINH1 PE=1 SV=2 - [SERPH_HUMAN]	44.74	17	4	13	31	11.2089	9.81	2	3	107.374	44.74	13	28	418	46.4112	8.68994
Q05DH1	Proteasome subunit alpha type (Fragment) OS=Homo sapiens GN=PSMA7 PE=2 SV=1 - [Q05DH1_HUMAN]	44.54	24	9	9	17	18.458	27.31	6	6	29.5568	41.18	7	11	238	26.6971	8.86572
Q95LN9	Putative uncharacterized protein OS=Macaca fascicularis PE=2 SV=1 - [Q95LN9_MACFA]	44.17	178	14	23	95	162.824	39.22	18	47	158.286	39.93	19	48	566	62.3781	5.71924
P02533	Keratin, type I cytoskeletal 14 OS=Homo sapiens GN=KRT14 PE=1 SV=4 - [K1C14_HUMAN]	43.86	63	9	18	112	195.737	43.64	17	59	177.896	36.02	14	53	472	51.5294	5.16064
P61326	Protein mago nashi homolog OS=Homo sapiens GN=MAGOH PE=1 SV=1 - [MGN_HUMAN]	43.84	17	4	4	11	19.4727	43.84	4	5	15.5455	31.51	3	6	146	17.1528	6.11279
A0A086BU93	Nitrogen regulatory protein P-II 1 OS=Pseudomonas aeruginosa VRFPA01 GN=G039_0325290 PE=3 SV=1 - [A0A086BU93_PSEAI]	43.75	8	3	4	14	25.8649	43.75	4	8	20.266	33.93	3	6	112	12.2786	5.57959
G1TU13	Uncharacterized protein OS=Oryctolagus cuniculus GN=RPS17 PE=1 SV=1 - [G1TU13_RABIT]	43.7	15	5	5	11	10.5011	26.67	3	4	25.9407	40.74	4	7	135	15.5144	9.84717
P08779	Keratin, type I cytoskeletal 16 OS=Homo sapiens GN=KRT16 PE=1 SV=4 - [K1C16_HUMAN]	43.55	63	9	17	83	123.586	37.84	14	42	138.924	39.75	14	41	473	51.2362	5.04639
Q9BQQ5	Ribosomal protein L27a OS=Homo sapiens GN=L27a PE=4 SV=1 - [Q9BQQ5_HUMAN]	43.4	33	4	4	14	13.7832	43.4	4	6	20.6656	31.13	3	8	106	12.0074	11.4585
E0VKP4	Actin, muscle OS=Pediculus humanus subsp. corporis GN=8235571 PE=3 SV=1 - [E0VKP4_PEDHC]	43.35	83	0	14	145	228.069	35.64	13	76	210.542	36.44	10	69	376	41.7589	5.47803
P02769	Serum albumin OS=Bos taurus GN=ALB PE=1 SV=4 - [ALBU_BOVIN]	42.83	2	29	32	449	683.375	33.61	27	184	938.229	39.54	28	265	607	69.2484	6.17627
H0UZL4	Uncharacterized protein OS=Cavia porcellus GN=KCNAB2 PE=4 SV=1 - [H0UZL4_CAVPO]	42.78	7	1	11	112	193.954	42.78	11	50	240.509	40.6	10	62	367	40.976	8.99756
A8K4Z4	60S acidic ribosomal protein P0 OS=Homo sapiens PE=2 SV=1 - [A8K4Z4_HUMAN]	42.27	31	11	11	41	100.924	42.27	11	25	54.5189	40.38	8	16	317	34.2178	5.97314
P11802	Cyclin-dependent kinase 4 OS=Homo sapiens GN=CDK4 PE=1 SV=2 - [CDK4_HUMAN]	42.24	432	9	10	24	15.0824	17.82	4	5	59.2376	42.24	10	19	303	33.7084	7.00537
K9IHP8	Putative serine/arginine-rich splicing factor 1 isoform 2 OS=Desmodus rotundus PE=2 SV=1 - [K9IHP8_DESRO]	42.03	21	9	9	34	52.8227	42.03	8	17	51.8956	39.61	7	17	207	22.9143	8.54346
A0A1Q6AEV4	Lac repressor OS=Escherichia coli GN=lacI PE=4 SV=1 - [A0A1Q6AEV4_ECOLX]	41.67	11	13	13	35	77.0157	41.67	12	19	60.7945	26.11	5	16	360	38.6101	6.65381
H0Y412	Protein PRRC2B (Fragment) OS=Homo sapiens GN=PRRC2B PE=1 SV=1 - [H0Y412_HUMAN]	41.5	1	2	14	91	163.109	37.07	13	50	157.283	31.97	12	41	588	63.2695	6.72705
G1P6Z6	Uncharacterized protein OS=Myotis lucifugus PE=4 SV=1 - [G1P6Z6_MYOLU]	41.38	6	2	2	8	14.9721	41.38	2	4	15.8319	27.59	1	4	87	9.74689	5.50342
G1PYK6	Uncharacterized protein OS=Myotis lucifugus PE=3 SV=1 - [G1PYK6_MYOLU]	41.06	1	2	4	20	21.2456	41.06	4	6	59.88	41.06	3	14	151	16.166	8.47021
W0AVZ4	Peptidyl-prolyl cis-trans isomerase OS=Escherichia albertii KF1 GN=slyD PE=3 SV=1 - [W0AVZ4_9ESCH]	40.21	8	7	7	95	194.815	40.21	7	48	173.398	37.63	5	47	194	20.6016	5.03369
P35579	Myosin-9 OS=Homo sapiens GN=MYH9 PE=1 SV=4 - [MYH9_HUMAN]	40.15	22	24	71	415	621.014	36.22	59	167	893.634	39.85	67	248	1960	226.392	5.60498
Q9P0M6	Core histone macro-H2A.2 OS=Homo sapiens GN=H2AFY2 PE=1 SV=3 - [H2AW_HUMAN]	40.05	7	6	9	23	22.031	27.69	6	7	61.6927	32.26	8	16	372	40.0334	9.68604
P07737	Profilin-1 OS=Homo sapiens GN=PFN1 PE=1 SV=2 - [PROF1_HUMAN]	40	7	4	4	6		0			17.1588	40	4	6	140	15.0446	8.26514
K7ENX8	Cold-inducible RNA-binding protein (Fragment) OS=Homo sapiens GN=CIRBP PE=1 SV=2 - [K7ENX8_HUMAN]	40	25	2	2	9	10.7943	40	2	3	18.4468	40	2	6	80	8.90833	4.80518
A8K7H3	cDNA FLJ77670, highly similar to Homo sapiens ribosomal protein S15a (RPS15A), mRNA OS=Homo sapiens PE=2 SV=1 - [A8K7H3_HUMAN]	40	21	4	4	18	14.3854	24.62	3	5	39.9195	40	4	13	130	14.8139	10.1255
G3V576	Heterogeneous nuclear ribonucleoproteins C1/C2 OS=Homo sapiens GN=HNRNPC PE=1 SV=1 - [G3V576_HUMAN]	39.83	28	1	8	55	70.6394	39.83	7	24	93.6112	35.06	7	31	231	25.2411	9.81787
H2RF72	Uncharacterized protein OS=Pan troglodytes PE=4 SV=1 - [H2RF72_PANTR]	39.76	23	11	11	26	22.1918	24.04	6	7	69.4648	37.98	10	19	337	37.1852	10.5796
P62249	40S ribosomal protein S16 OS=Homo sapiens GN=RPS16 PE=1 SV=2 - [RS16_HUMAN]	39.73	13	6	6	45	20.9496	21.92	3	7	110.855	39.73	6	38	146	16.435	10.2134
E9QEB6	ADP-ribosylation factor 2b (Fragment) OS=Danio rerio GN=arf2b PE=1 SV=1 - [E9QEB6_DANRE]	39.58	80	4	4	9	2.43904	6.94	1	1	23.8368	39.58	4	8	144	16.3145	5.63037
B2R4M6	Protein S100 OS=Homo sapiens PE=2 SV=1 - [B2R4M6_HUMAN]	39.47	3	3	3	11	15.0144	28.07	2	4	25.714	24.56	2	7	114	13.2015	6.12549
K7EK07	Histone H3 (Fragment) OS=Homo sapiens GN=H3F3B PE=1 SV=1 - [K7EK07_HUMAN]	39.39	43	1	3	22	26.6769	32.58	2	6	73.6583	31.06	2	16	132	14.9053	11.2974
Q96DI9	POLDIP3 protein (Fragment) OS=Homo sapiens GN=POLDIP3 PE=2 SV=2 - [Q96DI9_HUMAN]	39.33	18	9	13	81	140.775	34.77	11	43	141.449	35.25	12	38	417	45.6303	10.0376
J3KPX7	Prohibitin-2 OS=Homo sapiens GN=PHB2 PE=1 SV=2 - [J3KPX7_HUMAN]	39.26	41	9	9	18	24.1662	35.91	8	9	28.8643	27.85	6	9	298	33.2189	9.83252
B3KPS3	Tubulin alpha chain OS=Homo sapiens PE=2 SV=1 - [B3KPS3_HUMAN]	39.18	151	10	12	59	67.8734	30.05	9	20	121.759	37.98	11	39	416	46.2118	5.12256
R4GE02	Uncharacterized protein OS=Danio rerio GN=si:ch211-113a14.11 PE=1 SV=1 - [R4GE02_DANRE]	39.11	63	0	7	107	116.157	33.47	5	33	228.995	36.29	6	74	248	27.1328	10.1694
E4W6B6	RPL27/NME2 fusion protein (Fragment) OS=Homo sapiens GN=RPL27 PE=2 SV=1 - [E4W6B6_HUMAN]	38.89	10	4	4	22	32.8822	38.89	4	11	34.4681	38.89	4	11	126	14.248	10.4624
P02088	Hemoglobin subunit beta-1 OS=Mus musculus GN=Hbb-b1 PE=1 SV=2 - [HBB1_MOUSE]	38.78	43	4	5	15	18.7029	38.78	4	6	27.9191	25.85	3	9	147	15.8301	7.6499
P35754	Glutaredoxin-1 OS=Homo sapiens GN=GLRX PE=1 SV=2 - [GLRX1_HUMAN]	38.68	2	5	5	17	28.2759	38.68	4	6	45.1195	38.68	4	11	106	11.7682	8.08936
I7G2R3	Macaca fascicularis brain cDNA clone: QmoA-11878, similar to human phosphoribosyl pyrophosphate synthetase 1 (PRPS1), mRNA, RefSeq: NM_002764.2 OS=Macaca fascicularis PE=2 SV=1 - [I7G2R3_MACFA]	38.68	18	1	13	45	109.101	38.68	13	37	17.1836	17.92	4	8	318	34.7859	7.02002
Q8J014	Ribosomal protein S2 OS=Homo sapiens GN=rps2 PE=2 SV=1 - [Q8J014_HUMAN]	38.63	39	9	9	92	151.523	38.63	9	45	148.324	38.2	8	47	233	25.5888	9.86182
Q9BY49	Peroxisomal trans-2-enoyl-CoA reductase OS=Homo sapiens GN=PECR PE=1 SV=2 - [PECR_HUMAN]	38.61	3	7	7	21	43.61	30.69	6	13	31.7683	30.03	5	8	303	32.5239	8.80713
X5D2J9	General transcription factor IIi isoform D (Fragment) OS=Homo sapiens GN=GTF2I PE=2 SV=1 - [X5D2J9_HUMAN]	38.45	32	24	24	64	72.271	28.21	16	22	139.216	36.36	22	42	957	107.902	7.94287
Q8WUT1	POLDIP3 protein OS=Homo sapiens GN=POLDIP3 PE=1 SV=1 - [Q8WUT1_HUMAN]	38.43	4	1	5	53	89.0406	38.43	5	30	75.7895	38.43	5	23	229	24.8245	10.6968
H0VUU3	Histone H2B OS=Cavia porcellus GN=HIST1H2BD PE=3 SV=1 - [H0VUU3_CAVPO]	38.4	94	2	6	121	117.889	27.2	4	37	235.68	38.4	6	84	125	13.8365	10.3745
G1TQ90	Uncharacterized protein OS=Oryctolagus cuniculus GN=HIST1H3E PE=3 SV=1 - [G1TQ90_RABIT]	38.24	37	1	3	19	15.3458	31.62	2	6	45.0058	30.15	2	13	136	15.4225	11.2534
A8KBJ5	Histone H3 OS=Danio rerio GN=zgc:173552 PE=1 SV=1 - [A8KBJ5_DANRE]	38.24	32	1	3	11	10.0899	31.62	2	4	20.658	30.15	2	7	136	15.3945	11.2681
I7IFS8	Histone H3 OS=Babesia microti (strain RI) GN=BMR1_01G02928 PE=3 SV=1 - [I7IFS8_BABMR]	38.24	32	1	3	11	7.7894	8.09	1	3	21.8123	30.15	2	8	136	15.4026	11.2681
H0VKG1	Uncharacterized protein OS=Cavia porcellus GN=VCP PE=3 SV=1 - [H0VKG1_CAVPO]	38.21	109	28	28	77	189.592	37.22	24	50	98.4343	28.41	19	27	806	89.3458	5.30029
K9J4K9	Putative splicing factor arginine/serine-rich 7 35kda isoform cra b (Fragment) OS=Desmodus rotundus PE=2 SV=1 - [K9J4K9_DESRO]	38.21	24	3	4	10	12.4174	30.89	3	4	15.9277	38.21	4	6	123	14.2201	9.40771
H0V478	Uncharacterized protein OS=Cavia porcellus GN=EIF4A1 PE=3 SV=1 - [H0V478_CAVPO]	38.19	61	11	12	29	22.8493	21.36	6	7	72.8939	35.68	11	22	398	45.2622	5.47803
H0W947	Histone H2B OS=Cavia porcellus GN=LOC100717788 PE=3 SV=1 - [H0W947_CAVPO]	38.1	47	1	6	42	10.685	14.29	2	7	69.2224	38.1	6	35	126	13.8816	10.3159
H2Q212	Pyrophosphatase (Inorganic) 1 OS=Pan troglodytes GN=LOC101058953 PE=2 SV=1 - [H2Q212_PANTR]	38.06	16	7	7	8	1.82477	3.11	1	1	22.1488	38.06	7	7	289	32.6522	5.85889
H0W5L8	Uncharacterized protein OS=Cavia porcellus GN=SERPINH1 PE=3 SV=1 - [H0W5L8_CAVPO]	38.04	3	1	10	17					61.7341	38.04	10	17	418	46.4562	8.95361
G0YP42	Anti-human Langerin 2G3 lambda chain OS=Mus musculus PE=1 SV=1 - [G0YP42_MOUSE]	38.03	2	5	5	16	13.5546	27.35	3	4	37.5172	38.03	5	12	234	25.0404	6.07471
Q9NUF9	Nucleoside diphosphate kinase (Fragment) OS=Homo sapiens GN=c371H6.2 PE=3 SV=1 - [Q9NUF9_HUMAN]	37.91	18	4	4	12	22.1281	25.49	3	7	14.08	30.07	3	5	153	17.285	7.91357
P49411	Elongation factor Tu, mitochondrial OS=Homo sapiens GN=TUFM PE=1 SV=2 - [EFTU_HUMAN]	37.83	8	11	11	42	21.1891	15.27	5	7	101.437	34.29	10	35	452	49.5102	7.60596
P53999	Activated RNA polymerase II transcriptional coactivator p15 OS=Homo sapiens GN=SUB1 PE=1 SV=3 - [TCP4_HUMAN]	37.8	10	5	5	27	41.4215	37.8	5	13	42.3706	37.8	5	14	127	14.3864	9.59814
F5GX77	Multifunctional methyltransferase subunit TRM112-like protein OS=Homo sapiens GN=TRMT112 PE=1 SV=1 - [F5GX77_HUMAN]	37.74	8	3	3	16	33.9974	24.53	2	9	28.2525	37.74	3	7	106	11.9643	8.07471
B2R7R5	cDNA, FLJ93570, highly similar to Homo sapiens phosphoribosyl pyrophosphate synthetase-associated protein 2 (PRPSAP2), mRNA OS=Homo sapiens PE=2 SV=1 - [B2R7R5_HUMAN]	37.67	17	8	10	59	173.082	37.67	10	55	11.6205	8.4	2	4	369	40.8573	7.44482
A0A1V2G379	PadR family transcriptional regulator (Fragment) OS=Escherichia coli GN=BXT93_24210 PE=4 SV=1 - [A0A1V2G379_ECOLX]	37.42	9	3	3	3	3.04926	7.36	1	1	5.1219	30.06	2	2	163	18.4857	6.354
H2R9E8	Uncharacterized protein OS=Pan troglodytes GN=DHRS4L1 PE=4 SV=1 - [H2R9E8_PANTR]	37.37	9	3	8	46	47.7901	24.2	7	21	64.2081	37.37	8	25	281	30.2329	9.48096
P45974	Ubiquitin carboxyl-terminal hydrolase 5 OS=Homo sapiens GN=USP5 PE=1 SV=2 - [UBP5_HUMAN]	37.18	7	10	27	90	182.281	31.82	22	49	137.919	28.09	19	41	858	95.7253	5.03369
H2KPA2	Actin beta/gamma 1 OS=Clonorchis sinensis GN=CLF_101587 PE=3 SV=1 - [H2KPA2_CLOSI]	37.1	65	0	11	106	151.83	37.1	11	57	132.044	21.74	6	49	345	38.4409	5.79541
I7GKM7	Macaca fascicularis brain cDNA clone: QmoA-10942, similar to human RNA binding motif (RNP1, RRM) protein 3 (RBM3), mRNA, RefSeq: NM_006743.2 OS=Macaca fascicularis PE=2 SV=1 - [I7GKM7_MACFA]	37.04	7	2	2	6	8.93234	37.04	2	3	13.6143	37.04	2	3	135	14.721	9.08545
Q6DGX8	Proteasome subunit alpha type OS=Danio rerio GN=psma1 PE=1 SV=1 - [Q6DGX8_DANRE]	37.02	16	7	7	15	27.9173	29.39	5	8	14.2958	17.56	4	7	262	29.2297	6.68311
H2QQR2	Uncharacterized protein OS=Pan troglodytes PE=4 SV=1 - [H2QQR2_PANTR]	37	10	7	7	14	11.7385	21.67	5	5	30.0822	34.67	6	9	300	35.4128	9.92041
H2QCZ8	Keratin, type I cytoskeletal 17 OS=Pan troglodytes GN=KRT17 PE=3 SV=1 - [H2QCZ8_PANTR]	36.81	62	5	13	44	65.094	32.41	12	28	44.7741	22.92	8	16	432	48.0901	5.021
A1A766	Chaperone protein DnaK OS=Escherichia coli O1:K1 / APEC GN=dnaK PE=3 SV=1 - [DNAK_ECOK1]	36.52	64	15	16	44	139.829	36.52	14	32	47.7959	14.89	7	12	638	69.0725	4.97021
Q6PC90	40S ribosomal protein S12 OS=Danio rerio GN=rps12 PE=1 SV=1 - [Q6PC90_DANRE]	36.36	5	2	2	2	0	25	1	1	3.21315	11.36	1	1	132	14.4565	7.23975
C4QIC0	Tubulin beta chain OS=Schistosoma mansoni GN=Smp_078040 PE=3 SV=1 - [C4QIC0_SCHMA]	36.26	99	0	12	24	30.8795	22.75	7	9	48.2518	26.58	8	15	444	49.7889	4.89404
A0A024R172	Leukotriene B4 12-hydroxydehydrogenase, isoform CRA_a OS=Homo sapiens GN=LTB4DH PE=4 SV=1 - [A0A024R172_HUMAN]	36.17	9	8	8	21	34.6188	29.18	7	10	36.1329	36.17	8	11	329	35.8627	8.29443
P11908	Ribose-phosphate pyrophosphokinase 2 OS=Homo sapiens GN=PRPS2 PE=1 SV=2 - [PRPS2_HUMAN]	36.16	15	4	11	37	93.2119	36.16	11	31	14.5749	10.06	2	6	318	34.747	6.60986
H0YM60	H/ACA ribonucleoprotein complex subunit 3 OS=Homo sapiens GN=NOP10 PE=1 SV=1 - [H0YM60_HUMAN]	36.11	3	1	1	1		0			1.89014	36.11	1	1	36	4.23098	6.44287
G5E9W7	28S ribosomal protein S22, mitochondrial OS=Homo sapiens GN=MRPS22 PE=1 SV=1 - [G5E9W7_HUMAN]	36.05	16	9	9	10	25.3567	27.59	8	9	3.09342	8.46	1	1	319	36.7829	6.81494
D6RF44	Heterogeneous nuclear ribonucleoprotein D0 (Fragment) OS=Homo sapiens GN=HNRNPD PE=1 SV=8 - [D6RF44_HUMAN]	36.04	28	2	4	8	9.25935	21.62	2	3	12.4091	36.04	4	5	111	12.5455	8.57275
H0YDT6	Eukaryotic translation initiation factor 3 subunit F (Fragment) OS=Homo sapiens GN=EIF3F PE=1 SV=1 - [H0YDT6_HUMAN]	36	11	2	2	2					6.95984	36	2	2	100	10.8007	5.80811
H0YMZ1	Proteasome subunit alpha type (Fragment) OS=Homo sapiens GN=PSMA4 PE=1 SV=8 - [H0YMZ1_HUMAN]	35.91	28	6	6	19	36.8778	35.91	6	12	24.3366	14.09	3	7	220	24.5104	6.771
P11021	78 kDa glucose-regulated protein OS=Homo sapiens GN=HSPA5 PE=1 SV=2 - [GRP78_HUMAN]	35.78	69	17	18	43	80.3608	32.87	16	26	56.2421	16.97	8	17	654	72.2884	5.16064
S4R3U1	Epidermal growth factor receptor substrate 15 (Fragment) OS=Homo sapiens GN=EPS15 PE=1 SV=1 - [S4R3U1_HUMAN]	35.56	2	1	2	2	5.59568	35.56	2	2					90	9.5069	5.97314
A8K3K1	cDNA FLJ78096, highly similar to Homo sapiens actin, alpha, cardiac muscle (ACTC), mRNA OS=Homo sapiens PE=2 SV=1 - [A8K3K1_HUMAN]	35.54	91	1	12	106	153.448	35.54	12	57	140.632	17.24	5	49	377	42.0199	5.38916
P07309	Transthyretin OS=Mus musculus GN=Ttr PE=1 SV=1 - [TTHY_MOUSE]	35.37	2	3	3	3	2.58749	10.88	1	1	5.90609	24.49	2	2	147	15.766	6.16357
A8KB78	Ribosomal protein S23 OS=Danio rerio GN=rps23 PE=1 SV=1 - [A8KB78_DANRE]	34.97	18	3	3	20	11.7934	26.57	2	4	49.2647	34.97	3	16	143	15.8387	10.4917
B4E0S7	cDNA FLJ54950 OS=Homo sapiens PE=2 SV=1 - [B4E0S7_HUMAN]	34.88	3	1	4	30	45.5758	34.88	4	13	50.4708	34.88	4	17	172	18.4541	9.12939
A0A0A8UCE1	Pyruvate dehydrogenase E1 component OS=Escherichia coli O26:H11 GN=aceE PE=4 SV=1 - [A0A0A8UCE1_ECOLX]	34.61	25	20	20	42	62.1911	29.31	17	20	64.4365	25.03	15	22	887	99.606	5.68115
B4E2K6	cDNA FLJ60405, highly similar to Rho guanine nucleotide exchange factor 12 (Fragment) OS=Homo sapiens PE=2 SV=1 - [B4E2K6_HUMAN]	34.59	10	1	32	65		0			198.819	34.59	32	65	1278	143.859	6.31592
B4E1E9	cDNA FLJ61034, highly similar to Mitochondrial dicarboxylate carrier OS=Homo sapiens PE=2 SV=1 - [B4E1E9_HUMAN]	34.43	13	6	6	10	5.38636	13.11	2	2	21.2567	34.43	6	8	244	26.5239	9.68604
K9IQZ7	Proteasome endopeptidase complex (Fragment) OS=Desmodus rotundus PE=2 SV=1 - [K9IQZ7_DESRO]	34.39	14	5	5	14	31.0814	34.39	5	8	22.2637	28.05	4	6	221	24.4056	7.43018
P18124	60S ribosomal protein L7 OS=Homo sapiens GN=RPL7 PE=1 SV=1 - [RL7_HUMAN]	34.27	20	8	8	26	27.8462	30.65	7	11	38.662	34.27	8	15	248	29.2072	10.6528
Q5H9R5	Putative uncharacterized protein DKFZp781F05101 (Fragment) OS=Homo sapiens GN=DKFZp781F05101 PE=2 SV=1 - [Q5H9R5_HUMAN]	34.25	2	2	19	100	169.64	31.87	16	54	174.6	26.85	15	46	797	88.2267	6.88818
P13647	Keratin, type II cytoskeletal 5 OS=Homo sapiens GN=KRT5 PE=1 SV=3 - [K2C5_HUMAN]	34.24	18	4	20	119	186.367	32.54	19	64	159.509	26.44	15	55	590	62.34	7.73779
Q15717	ELAV-like protein 1 OS=Homo sapiens GN=ELAVL1 PE=1 SV=2 - [ELAV1_HUMAN]	34.05	18	8	8	24	38.0078	34.05	8	11	42.4649	34.05	8	13	326	36.0692	9.17334
P02662	Alpha-S1-casein OS=Bos taurus GN=CSN1S1 PE=1 SV=2 - [CASA1_BOVIN]	33.64	1	5	5	62	93.1062	26.17	4	29	112.64	33.64	5	33	214	24.5134	5.021
K9IZV2	Putative polyc-binding alphacp-1 OS=Desmodus rotundus PE=2 SV=1 - [K9IZV2_DESRO]	33.13	25	0	5	12	16.937	24.69	3	5	23.9404	21.25	4	7	320	33.7484	8.52881
A0A0A8U4P7	Ferric uptake regulation protein OS=Escherichia coli O26:H11 GN=fur PE=3 SV=1 - [A0A0A8U4P7_ECOLX]	33.11	12	3	3	5	12.9115	33.11	3	3	6.92463	18.92	2	2	148	16.7844	6.11279
A0A087WUL2	Proteasome subunit beta type-3 (Fragment) OS=Homo sapiens GN=PSMB3 PE=1 SV=1 - [A0A087WUL2_HUMAN]	33.1	9	3	3	7	6.224	23.45	2	2	17.0931	33.1	3	5	145	16.1501	8.42627
K9II85	Putative polyc-binding alphacp-1 OS=Desmodus rotundus PE=2 SV=1 - [K9II85_DESRO]	32.92	28	0	5	13	17.8738	24.53	3	5	26.4878	21.12	4	8	322	33.9045	8.23584
P00761	Trypsin OS=Sus scrofa PE=1 SV=1 - [TRYP_PIG]	32.9	2	9	9	322	566.443	26.84	8	132	805.804	32.9	9	190	231	24.3938	7.18115
G1T524	Uncharacterized protein OS=Oryctolagus cuniculus GN=SLC25A5 PE=3 SV=1 - [G1T524_RABIT]	32.89	43	4	10	51	37.8053	23.49	6	15	86.9039	32.89	10	36	298	32.9202	9.77393
F5H1S8	Malectin (Fragment) OS=Homo sapiens GN=MLEC PE=1 SV=1 - [F5H1S8_HUMAN]	32.88	10	3	3	4	1.9257	8.9	1	1	10.164	32.88	3	3	146	16.7186	5.56689
K9IQQ5	Putative secreted protein (Fragment) OS=Desmodus rotundus PE=2 SV=1 - [K9IQQ5_DESRO]	32.8	5	1	5	48	64.6509	24.73	4	23	63.5018	32.8	5	25	186	20.6434	5.40186
Q9P015	39S ribosomal protein L15, mitochondrial OS=Homo sapiens GN=MRPL15 PE=1 SV=1 - [RM15_HUMAN]	32.77	9	7	7	15	26.9399	32.77	7	9	17.4223	21.28	5	6	296	33.3989	10.0083
G1SSJ7	Uncharacterized protein OS=Oryctolagus cuniculus GN=PHB PE=4 SV=1 - [G1SSJ7_RABIT]	32.72	19	7	7	15	14.9856	15.44	3	5	31.2404	32.72	7	10	272	29.8039	5.75732
C9J9K3	40S ribosomal protein SA (Fragment) OS=Homo sapiens GN=RPSA PE=1 SV=8 - [C9J9K3_HUMAN]	32.7	34	6	6	20	27.5252	19.77	3	7	46.6673	26.24	5	13	263	29.386	5.24951
P01973	Hemoglobin subunit alpha OS=Lama glama GN=HBA PE=1 SV=1 - [HBA_LAMGL]	32.62	6	2	3	10	12.8997	21.99	2	4	21.678	32.62	3	6	141	15.0949	8.646
S4R402	Nucleolar and coiled-body phosphoprotein 1 OS=Homo sapiens GN=NOLC1 PE=1 SV=1 - [S4R402_HUMAN]	32.61	10	1	1	1					0	32.61	1	1	46	5.05072	8.67529
P04406	Glyceraldehyde-3-phosphate dehydrogenase OS=Homo sapiens GN=GAPDH PE=1 SV=3 - [G3P_HUMAN]	32.54	26	8	8	38	70.0218	32.54	8	18	89.1578	31.64	7	20	335	36.0304	8.45557
P21796	Voltage-dependent anion-selective channel protein 1 OS=Homo sapiens GN=VDAC1 PE=1 SV=2 - [VDAC1_HUMAN]	32.51	10	5	6	15	17.9058	25.8	5	6	27.0627	28.62	5	9	283	30.7536	8.54346
H0WAR7	Uncharacterized protein OS=Cavia porcellus GN=WDR77 PE=4 SV=1 - [H0WAR7_CAVPO]	32.46	5	1	9	119	215.195	32.46	9	115	11.247	6.43	2	4	342	37.1462	5.47803
A0A140LG21	Small nuclear ribonucleoprotein E OS=Danio rerio GN=snrpe PE=1 SV=1 - [A0A140LG21_DANRE]	32.39	14	2	2	5	8.77312	32.39	2	3	5.79516	15.49	1	2	71	8.23528	9.46631
P10599	Thioredoxin OS=Homo sapiens GN=TXN PE=1 SV=3 - [THIO_HUMAN]	32.38	8	3	3	18	3.41883	23.81	2	3	36.0338	32.38	3	15	105	11.7297	4.91943
H2R1Z3	Galectin OS=Pan troglodytes PE=4 SV=1 - [H2R1Z3_PANTR]	32.35	2	3	3	3					8.19756	32.35	3	3	136	15.0658	7.62061
P12763	Alpha-2-HS-glycoprotein OS=Bos taurus GN=AHSG PE=1 SV=2 - [FETUA_BOVIN]	32.31	1	8	8	30	56.8797	32.31	7	16	51.545	25.63	6	14	359	38.3944	5.50342
A0A1B8V769	DNA-binding protein HU OS=Pseudomonas sp. AU11447 GN=A6723_012120 PE=3 SV=1 - [A0A1B8V769_9PSED]	32.22	1	2	2	8	15.6182	32.22	2	5	9.85643	32.22	2	3	90	9.08105	9.99365
P35998	26S proteasome regulatory subunit 7 OS=Homo sapiens GN=PSMC2 PE=1 SV=3 - [PRS7_HUMAN]	32.1	26	13	13	19	29.9984	26.33	8	8	28.9448	22.86	8	11	433	48.6031	5.94775
Q53325	p40 (Fragment) OS=Mycoplasma hyorhinis GN=p40 PE=2 SV=2 - [Q53325_MYCHR]	32.01	1	9	9	36	48.3855	32.01	9	15	66.13	32.01	9	21	328	37.7013	6.90283
Q8VDD5	Myosin-9 OS=Mus musculus GN=Myh9 PE=1 SV=4 - [MYH9_MOUSE]	31.89	13	3	51	313	468.586	28.88	44	127	669.099	31.17	47	186	1960	226.232	5.65576
A0A0A8UD98	Dihydrolipoyl dehydrogenase OS=Escherichia coli O26:H11 GN=lpd PE=3 SV=1 - [A0A0A8UD98_ECOLX]	31.86	11	10	10	15	37.2183	25.11	8	11	12.5972	10.55	3	4	474	50.6566	6.15088
K7EJ78	40S ribosomal protein S15 OS=Homo sapiens GN=RPS15 PE=1 SV=2 - [K7EJ78_HUMAN]	31.78	12	2	2	14	2.6476	17.05	1	2	32.6676	31.78	2	12	129	14.7499	10.2427
P62318	Small nuclear ribonucleoprotein Sm D3 OS=Homo sapiens GN=SNRPD3 PE=1 SV=1 - [SMD3_HUMAN]	31.75	8	3	3	14	20.8963	31.75	3	8	15.9849	15.08	2	6	126	13.9073	10.3159
A0A0S2Z4G7	Nucleophosmin (Nucleolar phosphoprotein B23, numatrin), isoform CRA_f (Fragment) OS=Homo sapiens GN=NPM1 PE=2 SV=1 - [A0A0S2Z4G7_HUMAN]	31.7	16	4	4	14	17.6271	23.77	3	6	28.6876	31.7	4	8	265	29.4462	4.61475
A0A0R4IX65	Histone H2A (Fragment) OS=Danio rerio GN=h2afy PE=1 SV=1 - [A0A0R4IX65_DANRE]	31.69	2	1	3	4	5.92934	15.85	2	2	1.91621	20.77	2	2	183	19.5128	11.5317
A0A024QZP7	Cell division cycle 2, G1 to S and G2 to M, isoform CRA_a OS=Homo sapiens GN=CDC2 PE=1 SV=1 - [A0A024QZP7_HUMAN]	31.65	467	7	9	15	18.7087	21.21	6	7	21.3755	22.22	6	8	297	34.0599	8.39697
P24666	Low molecular weight phosphotyrosine protein phosphatase OS=Homo sapiens GN=ACP1 PE=1 SV=3 - [PPAC_HUMAN]	31.65	19	4	4	5					16.1093	31.65	4	5	158	18.0308	6.7417
A0A1U9X7W4	HSPA1A OS=Homo sapiens PE=3 SV=1 - [A0A1U9X7W4_HUMAN]	31.51	27	10	16	64	126.771	29.33	15	36	97.3993	21.53	11	28	641	69.995	5.65576
Q96HS1	Serine/threonine-protein phosphatase PGAM5, mitochondrial OS=Homo sapiens GN=PGAM5 PE=1 SV=2 - [PGAM5_HUMAN]	31.49	10	8	8	19	30.9031	31.14	7	12	17.4219	13.49	4	7	289	31.9846	8.67529
H2R1P7	Eukaryotic translation initiation factor 4E nuclear import factor 1 OS=Pan troglodytes GN=EIF4ENIF1 PE=2 SV=1 - [H2R1P7_PANTR]	31.47	13	17	17	49	37.4966	14.52	8	11	135.814	31.47	17	38	985	108.164	8.32373
B4DQD9	cDNA FLJ61154, highly similar to Replication protein A 32 kDa subunit OS=Homo sapiens PE=2 SV=1 - [B4DQD9_HUMAN]	31.44	11	4	4	11	12.0987	14.77	2	3	28.8804	31.44	4	8	264	28.5251	6.34131
Q5JSZ5	Protein PRRC2B OS=Homo sapiens GN=PRRC2B PE=1 SV=2 - [PRC2B_HUMAN]	31.4	14	3	48	237	367.355	26.24	36	111	425.343	25.3	40	126	2229	242.817	8.33838
F8W246	Ribosomal protein S13 OS=Danio rerio GN=rps13 PE=1 SV=1 - [F8W246_DANRE]	31.4	14	4	4	15	17.7826	31.4	3	7	24.2768	31.4	4	8	121	13.6436	10.8726
Q60FE6	Filamin A OS=Homo sapiens GN=FLNA PE=2 SV=1 - [Q60FE6_HUMAN]	31.39	37	45	51	134	289.143	28.33	45	80	173.958	21.02	34	54	2612	277.332	6.04932
G1NW62	Uncharacterized protein OS=Myotis lucifugus GN=YWHAE PE=3 SV=1 - [G1NW62_MYOLU]	31.33	123	3	5	12	12.5251	21.46	4	5	16.1513	27.9	4	7	233	26.4872	4.86865
B2RDD7	Protein arginine N-methyltransferase 5 OS=Homo sapiens PE=2 SV=1 - [B2RDD7_HUMAN]	31.24	24	14	14	25	85.6644	31.24	14	25					637	72.6636	6.29053
P35580	Myosin-10 OS=Homo sapiens GN=MYH10 PE=1 SV=3 - [MYH10_HUMAN]	31.22	23	32	45	172	246.206	23.18	33	69	356.57	29.96	43	103	1976	228.858	5.5415
G1TWL0	Uncharacterized protein OS=Oryctolagus cuniculus GN=HNRNPA2B1 PE=4 SV=1 - [G1TWL0_RABIT]	31.16	11	9	11	51	50.4145	21.25	7	15	136.911	31.16	11	36	353	37.3858	9.0708
J3KPE3	Receptor of-activated protein C kinase 1 OS=Homo sapiens GN=RACK1 PE=1 SV=1 - [J3KPE3_HUMAN]	31.14	34	6	6	18	15.7591	17.58	4	5	41.7622	31.14	6	13	273	30.085	7.6499
G1T6B3	Uncharacterized protein OS=Oryctolagus cuniculus GN=STRAP PE=4 SV=2 - [G1T6B3_RABIT]	31.14	12	9	9	15	21.8056	23.14	6	7	21.4726	26.57	7	8	350	38.475	5.12256
H2QEQ3	Zinc binding alcohol dehydrogenase domain containing 2 OS=Pan troglodytes GN=ZADH2 PE=2 SV=1 - [H2QEQ3_PANTR]	31.03	6	8	8	33	62.0012	31.03	8	20	46.1414	28.38	6	13	377	40.0528	8.17725
B4DKM5	cDNA FLJ60120, highly similar to Voltage-dependent anion-selective channel protein 2 OS=Homo sapiens PE=2 SV=1 - [B4DKM5_HUMAN]	30.98	13	6	6	23	32.1547	21.96	4	9	50.9863	30.98	6	14	255	27.4615	5.46533
H3BSJ9	Cytochrome b-c1 complex subunit 2, mitochondrial OS=Homo sapiens GN=UQCRC2 PE=1 SV=1 - [H3BSJ9_HUMAN]	30.95	12	6	6	12	9.71555	15.77	3	3	39.1009	30.95	6	9	336	36.3668	9.05615
A0A086C290	50S ribosomal protein L22 OS=Pseudomonas aeruginosa VRFPA01 GN=rplV PE=3 SV=1 - [A0A086C290_PSEAI]	30.91	3	2	2	5	12.9832	30.91	2	3	8.54459	30.91	2	2	110	11.9035	10.1108
P01040	Cystatin-A OS=Homo sapiens GN=CSTA PE=1 SV=1 - [CYTA_HUMAN]	30.61	2	2	2	6	12.107	30.61	2	4	6.35993	30.61	2	2	98	10.9997	5.50342
B4E2Z3	cDNA FLJ54090, highly similar to 4F2 cell-surface antigen heavy chain OS=Homo sapiens PE=2 SV=1 - [B4E2Z3_HUMAN]	30.53	18	10	10	18	30.9965	21.92	6	9	16.9971	20.16	7	9	511	55.9047	5.17334
G1P9K5	40S ribosomal protein S6 OS=Myotis lucifugus GN=RPS6 PE=3 SV=1 - [G1P9K5_MYOLU]	30.52	17	8	8	19	35.9628	25.7	7	9	31.6408	23.69	6	10	249	28.663	10.8579
H2Q9Z6	Family with sequence similarity 103, member A1 OS=Pan troglodytes GN=FAM103A1 PE=2 SV=1 - [H2Q9Z6_PANTR]	30.51	3	3	3	4	4.92089	17.8	2	2	6.10911	23.73	2	2	118	14.3586	8.39697
H0V034	Proteasome subunit alpha type OS=Cavia porcellus GN=PSMA6 PE=3 SV=1 - [H0V034_CAVPO]	30.49	34	6	6	9	12.8123	23.17	4	4	16.1869	21.14	4	5	246	27.3938	6.75635
I3L1P4	Proline-, glutamic acid- and leucine-rich protein 1 (Fragment) OS=Homo sapiens GN=PELP1 PE=1 SV=1 - [I3L1P4_HUMAN]	30.41	2	1	2	4	3.37234	20.95	1	1	5.26538	30.41	2	3	148	15.0561	10.6821
G1TWZ0	40S ribosomal protein S27 OS=Oryctolagus cuniculus PE=3 SV=1 - [G1TWZ0_RABIT]	30.38	17	2	2	8	2.84379	30.38	2	2	13.3837	30.38	2	6	79	8.76545	8.90967
D8M3T5	Histone H3 OS=Blastocystis hominis GN=GSBLH_T00002668001 PE=3 SV=1 - [D8M3T5_BLAHO]	30.37	11	1	2	11	2.4088	23.7	1	1	32.5052	30.37	2	10	135	15.4255	11.1509
D8LW13	Histone H3 OS=Blastocystis hominis GN=GSBLH_T00000394001 PE=3 SV=1 - [D8LW13_BLAHO]	30.37	10	1	2	7		0			20.7369	30.37	2	7	135	15.3655	11.1509
H0V7W3	Uncharacterized protein OS=Cavia porcellus GN=EIF4A3 PE=3 SV=1 - [H0V7W3_CAVPO]	30.3	45	10	11	32	33.0256	26.11	8	11	61.3774	30.3	10	21	406	46.2999	7.02002
H2RCS8	Uncharacterized protein OS=Pan troglodytes GN=CAPZA1 PE=3 SV=1 - [H2RCS8_PANTR]	30.28	12	4	5	17	26.2204	30.28	5	7	33.6412	30.28	5	10	284	32.7012	5.69385
G5E972	Lamina-associated polypeptide 2, isoforms beta/gamma OS=Homo sapiens GN=TMPO PE=1 SV=1 - [G5E972_HUMAN]	30.19	11	8	8	11	18.2739	26.33	6	6	15.9957	17.87	5	5	414	46.2782	9.02686
G3V4W0	Heterogeneous nuclear ribonucleoproteins C1/C2 (Fragment) OS=Homo sapiens GN=HNRNPC PE=1 SV=1 - [G3V4W0_HUMAN]	30.15	35	1	8	59	79.4642	30.15	7	25	105.233	25.95	7	34	262	28.8985	8.39697
P52597	Heterogeneous nuclear ribonucleoprotein F OS=Homo sapiens GN=HNRNPF PE=1 SV=3 - [HNRPF_HUMAN]	30.12	12	5	6	31	29.3151	8.19	2	7	79.8373	30.12	6	24	415	45.6429	5.57959
G1QAK4	40S ribosomal protein S24 OS=Myotis lucifugus GN=RPS24 PE=3 SV=1 - [G1QAK4_MYOLU]	30	25	4	4	29	41.3083	30	4	15	37.8428	30	4	14	130	15.0592	10.8872
R4GMP8	Serine/arginine-rich splicing factor 10 isoform 2 OS=Homo sapiens GN=SRSF10 PE=1 SV=1 - [R4GMP8_HUMAN]	30	12	1	1	1					3.53885	30	1	1	40	4.62321	5.10986
Q76N53	Ribosomal protein L31 (Fragment) OS=Homo sapiens PE=4 SV=1 - [Q76N53_HUMAN]	29.79	14	1	1	2	3.35231	29.79	1	1	2.79915	29.79	1	1	47	5.59294	9.31982
J3QRG6	Cyclin-dependent kinase inhibitor 2A OS=Homo sapiens GN=CDKN2A PE=1 SV=1 - [J3QRG6_HUMAN]	29.71	17	3	3	10	9.63785	29.71	3	3	23.8283	29.71	3	7	138	14.9587	6.39209
P46109	Crk-like protein OS=Homo sapiens GN=CRKL PE=1 SV=1 - [CRKL_HUMAN]	29.7	8	6	6	8	4.82965	11.55	3	3	14.1071	26.07	5	5	303	33.7559	6.7417
A0A0A8U615	Chaperone modulatory protein CbpM OS=Escherichia coli O26:H11 GN=cbpM PE=3 SV=1 - [A0A0A8U615_ECOLX]	29.7	4	1	1	5	3.11746	29.7	1	4	0	29.7	1	1	101	11.535	5.40186
H2Q030	Protein S100 OS=Pan troglodytes GN=S100A7 PE=3 SV=1 - [H2Q030_PANTR]	29.7	4	2	2	4	5.8181	29.7	2	3	0	10.89	1	1	101	11.5486	6.78564
H2RD37	Rho guanine nucleotide exchange factor (GEF) 12 OS=Pan troglodytes GN=ARHGEF12 PE=2 SV=1 - [H2RD37_PANTR]	29.53	17	2	33	69		0			212.725	29.53	33	69	1544	173.153	5.74463
B3KS36	cDNA FLJ35376 fis, clone SKMUS2004044, highly similar to Homo sapiens ribosomal protein L3 (RPL3), transcript variant 2, mRNA OS=Homo sapiens PE=2 SV=1 - [B3KS36_HUMAN]	29.38	23	7	7	18	40.2153	26.84	6	10	30.9519	20.06	4	8	354	40.1197	10.3013
H2QY26	Proline-rich coiled-coil 2B OS=Pan troglodytes GN=PRRC2B PE=2 SV=1 - [H2QY26_PANTR]	29.3	11	1	44	213	333.195	23.19	33	101	369.061	23.19	36	112	2229	242.815	8.29443
E9QHS9	Ribosomal protein, large, P1 OS=Danio rerio GN=rplp1 PE=1 SV=1 - [E9QHS9_DANRE]	29.09	3	1	1	2	6.0089	29.09	1	2					55	5.9571	4.80518
Q9H3K6	BolA-like protein 2 OS=Homo sapiens GN=BOLA2 PE=1 SV=1 - [BOLA2_HUMAN]	29.07	8	2	2	10	21.0291	29.07	2	7	13.542	18.6	1	3	86	10.1102	6.52197
V9HW35	Epididymis secretory protein Li 55 OS=Homo sapiens GN=HEL-S-55 PE=2 SV=1 - [V9HW35_HUMAN]	29.01	10	4	4	6	2.06925	4.94	1	1	12.3052	29.01	4	5	162	17.02	7.23975
C6KT18	Histone H2A OS=Plasmodium falciparum (isolate 3D7) GN=PF3D7_0617800 PE=3 SV=1 - [C6KT18_PLAF7]	28.79	15	1	2	7	2.59917	21.97	1	2	9.70258	6.82	1	5	132	14.1137	10.2866
G1Q2Z1	Histone H2B OS=Myotis lucifugus GN=HIST2H2BE PE=3 SV=1 - [G1Q2Z1_MYOLU]	28.74	47	1	6	101	86.0968	19.76	3	26	218.072	28.74	6	75	167	18.4688	10.2573
B7ZMS6	2500003M10Rik protein OS=Mus musculus GN=Chtop PE=2 SV=1 - [B7ZMS6_MOUSE]	28.65	17	4	4	38	61.6994	28.65	4	21	52.1846	28.65	4	17	178	19.3595	12.0005
H2Q083	Death associated protein 3 OS=Pan troglodytes GN=DAP3 PE=2 SV=1 - [H2Q083_PANTR]	28.64	15	8	8	9	23.1707	25.88	7	8	2.55852	2.76	1	1	398	45.5367	9.05615
Q8K1F2	Anti-VIPase light chain variable region (Fragment) OS=Mus musculus PE=1 SV=1 - [Q8K1F2_MOUSE]	28.57	1	2	2	5	13.7923	28.57	2	4	3.77215	14.29	1	1	112	11.9458	8.45557
Q96RV7	3-phosphoglycerate dehydrogenase (Fragment) OS=Homo sapiens PE=4 SV=1 - [Q96RV7_HUMAN]	28.57	11	1	1	1		0			1.69234	28.57	1	1	28	3.21975	6.45557
B4DMA2	cDNA FLJ54023, highly similar to Heat shock protein HSP 90-beta OS=Homo sapiens PE=2 SV=1 - [B4DMA2_HUMAN]	28.57	93	6	14	26	43.447	23.47	10	12	42.5743	21.57	10	14	686	79.1451	5.021
A0A1B8VEE5	Reactive intermediate/imine deaminase OS=Pseudomonas sp. AU11447 GN=A6723_004615 PE=4 SV=1 - [A0A1B8VEE5_9PSED]	28.57	3	3	3	6	10.3335	28.57	3	4	5.48348	18.25	2	2	126	13.5871	5.42725
K9IS85	Putative eukaryotic translation initiation factor 4e type 2 isoform 1 (Fragment) OS=Desmodus rotundus PE=2 SV=1 - [K9IS85_DESRO]	28.57	15	5	5	23	34.5947	28.57	5	11	32.547	19.75	4	12	238	27.3938	8.89502
H2Q9V0	Electron-transfer-flavoprotein, alpha polypeptide OS=Pan troglodytes GN=ETFA PE=2 SV=1 - [H2Q9V0_PANTR]	28.53	21	5	5	8	2.24764	10.51	2	2	20.349	28.53	5	6	333	35.1436	8.19189
Q546G4	Albumin 1 OS=Mus musculus GN=Alb PE=1 SV=1 - [Q546G4_MOUSE]	28.45	1	3	17	138	177.66	26.81	15	55	272.704	21.22	12	83	608	68.6477	6.07471
F1R3J9	Protein arginine methyltransferase 1 OS=Danio rerio GN=prmt1 PE=1 SV=1 - [F1R3J9_DANRE]	28.45	12	1	9	24	65.7738	28.45	9	18	17.7794	12.07	3	6	348	40.09	5.61768
A0A0R4IG57	Glutaredoxin (thioltransferase) OS=Danio rerio GN=glrx PE=1 SV=1 - [A0A0R4IG57_DANRE]	28.3	1	1	1	2	0	28.3	1	2					106	11.452	7.76709
Q8NDP0	Putative uncharacterized protein DKFZp586G1518 (Fragment) OS=Homo sapiens GN=DKFZp586G1518 PE=2 SV=1 - [Q8NDP0_HUMAN]	28.28	20	6	6	10	5.11461	11.11	3	3	17.8383	28.28	6	7	297	32.9554	9.39307
Q59FS3	Ribosomal protein S7 variant (Fragment) OS=Homo sapiens PE=2 SV=1 - [Q59FS3_HUMAN]	28.21	10	1	1	1					3.20529	28.21	1	1	78	8.94475	8.57275
V9H1D9	Alpha globin OS=Homo sapiens PE=3 SV=1 - [V9H1D9_HUMAN]	28.13	29	1	3	5	2.5991	7.03	1	1	13.0072	28.13	3	4	128	13.5741	8.23584
A0A0H2WUH3	Cyclic AMP receptor protein,catabolite gene activator OS=Salmonella paratyphi A (strain ATCC 9150 / SARB42) GN=crp PE=4 SV=1 - [A0A0H2WUH3_SALPA]	28.1	9	4	4	9	14.1741	19.05	3	5	11.922	28.1	4	4	210	23.6133	8.25049
Q86WX3	Active regulator of SIRT1 OS=Homo sapiens GN=RPS19BP1 PE=1 SV=1 - [AROS_HUMAN]	27.94	6	3	3	3					9.96443	27.94	3	3	136	15.4244	10.7407
P07900	Heat shock protein HSP 90-alpha OS=Homo sapiens GN=HSP90AA1 PE=1 SV=5 - [HS90A_HUMAN]	27.87	56	6	14	32	54.3698	26.37	12	15	50.0563	21.31	10	17	732	84.6067	5.021
A0A0G2J229	60S ribosomal protein L39 (Fragment) OS=Emmonsia crescens UAMH 3008 GN=EMCG_01973 PE=4 SV=1 - [A0A0G2J229_9EURO]	27.78	17	1	1	19	36.1746	27.78	1	12	20.7306	27.78	1	7	36	4.31749	12.6157
E7FDX0	Uncharacterized protein OS=Danio rerio PE=4 SV=1 - [E7FDX0_DANRE]	27.78	6	1	1	1					2.82078	27.78	1	1	54	6.2262	9.5249
P63104	14-3-3 protein zeta/delta OS=Homo sapiens GN=YWHAZ PE=1 SV=1 - [1433Z_HUMAN]	27.76	116	4	6	11	10.1691	22.86	4	4	14.7699	16.73	4	7	245	27.7277	4.79248
A0A087WWU8	Tropomyosin alpha-3 chain OS=Homo sapiens GN=TPM3 PE=1 SV=1 - [A0A087WWU8_HUMAN]	27.75	79	5	10	24	38.3726	25.99	9	13	32.181	23.79	7	11	227	26.4044	4.77979
A0A0M4LB22	B2 12-1 anti-human butyrylcholinesterase (BChE) heavy chain variable region (Fragment) OS=Mus musculus PE=2 SV=1 - [A0A0M4LB22_MOUSE]	27.73	2	2	2	22	40.7838	27.73	2	12	36.6247	27.73	2	10	119	13.4634	5.41455
G5EA06	28S ribosomal protein S27, mitochondrial OS=Homo sapiens GN=MRPS27 PE=1 SV=1 - [G5EA06_HUMAN]	27.65	13	8	8	14	33.3516	27.65	8	11	6.16785	7.26	2	3	358	41.3031	5.51611
P31946	14-3-3 protein beta/alpha OS=Homo sapiens GN=YWHAB PE=1 SV=3 - [1433B_HUMAN]	27.64	111	1	4	8	8.704	27.64	4	4	9.48712	4.07	1	4	246	28.0648	4.83057
B2R4K7	60S ribosomal protein L6 OS=Homo sapiens PE=2 SV=1 - [B2R4K7_HUMAN]	27.43	20	6	6	29	56.9532	27.43	6	16	49.4027	15.63	3	13	288	32.6816	10.6235
I7G6C0	Macaca fascicularis brain cDNA clone: QflA-19676, similar to human tyrosine 3-monooxygenase/tryptophan 5-monooxygenaseactivation protein, beta polypeptide (YWHAB), transcriptvariant 2, mRNA, RefSeq: N... OS=Macaca fascicularis PE=2 SV=1 - [I7G6C0_MACFA]	27.24	108	1	4	8	8.704	15.04	3	3	12.5556	16.26	2	5	246	28.0078	4.83057
P08754	Guanine nucleotide-binding protein G(k) subunit alpha OS=Homo sapiens GN=GNAI3 PE=1 SV=3 - [GNAI3_HUMAN]	27.12	101	4	7	17	11.9463	11.58	3	5	35.0855	22.88	6	12	354	40.5063	5.69385
P22314	Ubiquitin-like modifier-activating enzyme 1 OS=Homo sapiens GN=UBA1 PE=1 SV=3 - [UBA1_HUMAN]	27.03	18	23	23	90	176.035	26.75	22	47	146.895	25.33	19	43	1058	117.774	5.75732
F6KPG5	Albumin (Fragment) OS=Homo sapiens PE=2 SV=1 - [F6KPG5_HUMAN]	27.01	15	12	17	148	229.032	25.64	15	64	285.379	23.25	14	84	585	66.488	6.03662
Q59H57	Fusion (Involved in t(12;16) in malignant liposarcoma) isoform a variant (Fragment) OS=Homo sapiens PE=2 SV=1 - [Q59H57_HUMAN]	27	23	5	7	45	94.1883	27	7	27	52.355	16.33	6	18	300	31.9743	9.5249
G7YY65	Aminoglycoside 3'-phosphotransferase OS=Clonorchis sinensis GN=CLF_113323 PE=4 SV=1 - [G7YY65_CLOSI]	26.88	5	5	5	11	13.1022	26.88	5	5	15.7241	20.95	4	6	253	28.8624	5.09717
F5H018	GTP-binding nuclear protein Ran (Fragment) OS=Homo sapiens GN=RAN PE=1 SV=8 - [F5H018_HUMAN]	26.77	38	4	4	6					20.345	26.77	4	6	198	22.4217	8.73389
A0A075B797	Nitric oxide synthase-interacting protein (Fragment) OS=Homo sapiens GN=NOSIP PE=1 SV=1 - [A0A075B797_HUMAN]	26.72	14	4	4	5	6.92527	17.67	3	3	2.73423	13.79	2	2	232	25.7139	8.83643
G1THZ6	Uncharacterized protein OS=Oryctolagus cuniculus PE=4 SV=2 - [G1THZ6_RABIT]	26.67	1	6	6	18	67.782	23.75	5	15	12.2882	13.33	3	3	480	51.9372	7.66455
G1TSH8	Nuclease-sensitive element-binding protein 1 OS=Oryctolagus cuniculus GN=YBX1 PE=4 SV=1 - [G1TSH8_RABIT]	26.61	26	1	3	32	61.124	26.61	3	16	63.3239	26.61	3	16	248	28.599	9.92041
P29372	DNA-3-methyladenine glycosylase OS=Homo sapiens GN=MPG PE=1 SV=3 - [3MG_HUMAN]	26.51	7	6	6	15	26.6714	26.51	6	8	20.8329	22.48	5	7	298	32.8478	9.56885
C9J4Z3	60S ribosomal protein L37a OS=Homo sapiens GN=RPL37A PE=1 SV=1 - [C9J4Z3_HUMAN]	26.47	5	1	1	15	30.0022	26.47	1	7	33.7603	26.47	1	8	68	7.61894	10.0083
D6RC14	39S ribosomal protein L3, mitochondrial (Fragment) OS=Homo sapiens GN=MRPL3 PE=1 SV=1 - [D6RC14_HUMAN]	26.45	9	2	2	2	2.28437	5.81	1	1	3.18161	20.65	1	1	155	17.084	10.2866
A0A087WVZ3	Guanine nucleotide-binding protein subunit alpha-11 (Fragment) OS=Homo sapiens GN=GNA11 PE=1 SV=1 - [A0A087WVZ3_HUMAN]	26.39	14	1	1	3	4.42922	26.39	1	2	2.80319	26.39	1	1	72	8.15437	8.19189
H2KRU0	Actin beta/gamma 1 OS=Clonorchis sinensis GN=CLF_107145 PE=3 SV=1 - [H2KRU0_CLOSI]	26.33	60	0	9	57	86.7692	26.33	9	32	68.9531	17.02	5	25	376	41.827	5.69385
P62424	60S ribosomal protein L7a OS=Homo sapiens GN=RPL7A PE=1 SV=2 - [RL7A_HUMAN]	26.32	22	8	8	37	64.3789	26.32	7	19	58.1837	26.32	8	18	266	29.977	10.6089
P02770	Serum albumin OS=Rattus norvegicus GN=Alb PE=1 SV=2 - [ALBU_RAT]	26.32	3	5	18	148	216.222	24.67	16	61	308.472	20.23	14	87	608	68.6861	6.48096
G1QDB0	40S ribosomal protein S26 (Fragment) OS=Myotis lucifugus GN=LOC102442112 PE=3 SV=1 - [G1QDB0_MYOLU]	26.32	7	2	2	9	13.5534	13.16	1	4	16.1168	26.32	2	5	114	12.876	11.0044
F8WBC1	Putative RNA-binding protein Luc7-like 1 OS=Homo sapiens GN=LUC7L PE=1 SV=1 - [F8WBC1_HUMAN]	26.19	8	1	1	2	2.5317	26.19	1	1	2.42214	26.19	1	1	42	4.55434	11.8979
Q5VXN0	Ribosome production factor 2 homolog (Fragment) OS=Homo sapiens GN=RPF2 PE=1 SV=1 - [Q5VXN0_HUMAN]	26.17	11	4	4	7	5.03531	11.21	2	2	16.6068	26.17	4	5	214	24.589	9.5542
Q5QPL9	RNA-binding protein Raly (Fragment) OS=Homo sapiens GN=RALY PE=1 SV=1 - [Q5QPL9_HUMAN]	26.16	24	5	5	19	26.4569	26.16	5	9	34.4425	26.16	5	10	237	24.6503	10.4917
B7Z478	Proteasome (Prosome, macropain) subunit, beta type, 2, isoform CRA_b OS=Homo sapiens GN=PSMB2 PE=2 SV=1 - [B7Z478_HUMAN]	26.14	8	4	4	10	18.5205	26.14	4	6	12.7206	24.43	3	4	176	20.1943	7.44482
Q8ND56	Protein LSM14 homolog A OS=Homo sapiens GN=LSM14A PE=1 SV=3 - [LS14A_HUMAN]	26.13	27	14	14	116	176.051	26.13	13	44	263.456	26.13	14	72	463	50.4991	9.5249
Q15365	Poly(rC)-binding protein 1 OS=Homo sapiens GN=PCBP1 PE=1 SV=2 - [PCBP1_HUMAN]	26.12	5	3	5	16	19.6032	22.19	4	7	26.4357	26.12	5	9	356	37.4739	7.09326
Q4VXZ8	Peroxisomal 2,4-dienoyl-CoA reductase OS=Homo sapiens GN=DECR2 PE=1 SV=1 - [Q4VXZ8_HUMAN]	26.07	12	5	5	7	15.8248	26.07	5	5	1.94915	3.93	1	2	280	29.4652	8.86572
P12273	Prolactin-inducible protein OS=Homo sapiens GN=PIP PE=1 SV=1 - [PIP_HUMAN]	26.03	1	4	4	7	10.358	15.07	3	4	7.44303	17.81	3	3	146	16.5618	8.04541
A0A093DGG6	Molybdopterin synthase sulfur carrier subunit OS=Escherichia coli GN=moaD PE=3 SV=1 - [A0A093DGG6_ECOLX]	25.93	4	1	1	13	22.0501	25.93	1	5	37.115	25.93	1	8	81	8.72446	4.56396
G1Q6U3	Elongation factor 1-alpha OS=Myotis lucifugus GN=LOC102442323 PE=3 SV=1 - [G1Q6U3_MYOLU]	25.93	7	1	7	37	28.0365	13.41	4	10	74.1065	25.93	7	27	455	49.2654	8.646
H2QTS9	Uncharacterized protein OS=Pan troglodytes GN=BCLAF1 PE=4 SV=1 - [H2QTS9_PANTR]	25.87	15	3	21	191	319.434	23.91	19	107	266.986	19.78	16	84	920	106.032	9.979
F5H610	5'-AMP-activated protein kinase subunit beta-1 (Fragment) OS=Homo sapiens GN=PRKAB1 PE=1 SV=1 - [F5H610_HUMAN]	25.81	10	1	1	2					2.04437	25.81	1	2	62	6.84041	5.21143
K9IIN8	Putative polyc-binding alphacp-1 OS=Desmodus rotundus PE=2 SV=1 - [K9IIN8_DESRO]	25.78	31	1	5	16	18.7729	18.13	3	5	36.9128	25.78	5	11	353	37.207	7.06396
Q52LJ0	Protein FAM98B OS=Homo sapiens GN=FAM98B PE=1 SV=1 - [FA98B_HUMAN]	25.76	7	1	6	15	17.5867	22.42	5	6	24.2768	21.82	5	9	330	37.167	6.29053
P19474	E3 ubiquitin-protein ligase TRIM21 OS=Homo sapiens GN=TRIM21 PE=1 SV=1 - [RO52_HUMAN]	25.68	4	11	11	21	35.6551	19.16	9	12	28.7875	14.32	6	9	475	54.1351	6.37939
A0A086C283	30S ribosomal protein S7 OS=Pseudomonas aeruginosa VRFPA01 GN=rpsG PE=3 SV=1 - [A0A086C283_PSEAI]	25.64	3	3	3	6	12.1739	25.64	3	4	7.16231	17.95	2	2	156	17.4934	10.2427
Q13162	Peroxiredoxin-4 OS=Homo sapiens GN=PRDX4 PE=1 SV=1 - [PRDX4_HUMAN]	25.46	21	4	5	11	6.8091	4.43	1	2	29.2091	25.46	5	9	271	30.5208	6.29053
A0A0A8UDA7	Carbonic anhydrase OS=Escherichia coli O26:H11 GN=can PE=3 SV=1 - [A0A0A8UDA7_ECOLX]	25.45	8	4	4	9	19.8306	18.64	3	5	12.8836	18.18	3	4	220	25.0808	6.65381
P81605	Dermcidin OS=Homo sapiens GN=DCD PE=1 SV=2 - [DCD_HUMAN]	25.45	2	3	3	14	17.9241	25.45	3	6	26.5756	25.45	3	8	110	11.2768	6.53662
G1T1V0	Uncharacterized protein OS=Oryctolagus cuniculus GN=KRT10 PE=3 SV=1 - [G1T1V0_RABIT]	25.31	58	1	18	232	419.887	21.27	17	131	355.429	22.14	14	101	569	58.0894	5.03369
G7YCP7	Tubulin beta OS=Clonorchis sinensis GN=CLF_104965 PE=3 SV=1 - [G7YCP7_CLOSI]	25.24	93	1	12	24	33.3709	18.18	8	10	45.7057	18.5	8	14	638	71.1044	7.02002
B5BU38	Annexin OS=Homo sapiens GN=ANXA1 PE=2 SV=1 - [B5BU38_HUMAN]	25.14	11	6	6	13	12.2845	20.23	4	5	26.6951	18.21	5	8	346	38.656	7.02002
H2Q299	Kinesin family member 11 OS=Pan troglodytes GN=KIF11 PE=2 SV=1 - [H2Q299_PANTR]	25.09	10	18	18	42	132.089	25.09	18	38	10.948	3.69	3	4	1056	119.076	5.64307
E9PKD5	26S protease regulatory subunit 6A (Fragment) OS=Homo sapiens GN=PSMC3 PE=1 SV=2 - [E9PKD5_HUMAN]	25.08	15	5	5	13	19.995	25.08	5	7	17.6156	25.08	4	6	311	34.5923	5.33838
A0A024R889	Spectrin, alpha, non-erythrocytic 1 (Alpha-fodrin), isoform CRA_g OS=Homo sapiens GN=SPTAN1 PE=4 SV=1 - [A0A024R889_HUMAN]	25.08	29	41	41	60	157.642	22.8	37	47	39.5544	7.18	12	13	2452	282.076	5.33838
H0YJI1	SRA stem-loop-interacting RNA-binding protein, mitochondrial (Fragment) OS=Homo sapiens GN=SLIRP PE=1 SV=1 - [H0YJI1_HUMAN]	25	7	1	1	1					2.54261	25	1	1	40	4.27537	12.7036
K7ENK9	Vesicle-associated membrane protein 2 OS=Homo sapiens GN=VAMP2 PE=4 SV=1 - [K7ENK9_HUMAN]	25	22	1	1	1					2.67264	25	1	1	68	7.77024	8.79248
H2QUQ0	Williams Beuren syndrome chromosome region 22 OS=Pan troglodytes GN=WBSCR22 PE=2 SV=1 - [H2QUQ0_PANTR]	24.91	8	5	5	22	55.5754	24.91	5	13	32.3899	24.91	5	9	281	31.8	8.66064
E9PK01	Elongation factor 1-delta (Fragment) OS=Homo sapiens GN=EEF1D PE=1 SV=1 - [E9PK01_HUMAN]	24.9	26	6	6	11	30.1233	19.92	5	8	10.4593	18.77	3	3	261	28.8036	5.021
G1PX94	Uncharacterized protein OS=Myotis lucifugus GN=PSMC4 PE=3 SV=1 - [G1PX94_MYOLU]	24.88	16	9	9	19	37.5253	24.88	9	11	20.3177	11	4	8	418	47.3506	5.21143
P51571	Translocon-associated protein subunit delta OS=Homo sapiens GN=SSR4 PE=1 SV=1 - [SSRD_HUMAN]	24.86	9	3	3	7	6.8502	17.34	2	2	15.3515	24.86	3	5	173	18.9866	6.15088
P07195	L-lactate dehydrogenase B chain OS=Homo sapiens GN=LDHB PE=1 SV=2 - [LDHB_HUMAN]	24.85	14	10	10	20	26.502	22.46	9	9	27.3926	22.75	7	11	334	36.6151	6.04932
P48668	Keratin, type II cytoskeletal 6C OS=Homo sapiens GN=KRT6C PE=1 SV=3 - [K2C6C_HUMAN]	24.82	23	4	15	105	160.38	21.28	12	52	163.128	24.82	15	53	564	59.9883	8.00146
A4HUJ9	Histone H3 OS=Leishmania infantum GN=LINJ_10_0920 PE=3 SV=1 - [A4HUJ9_LEIIN]	24.62	1	1	1	1		0			0	24.62	1	1	130	14.624	11.1655
H2QJ16	Uncharacterized protein OS=Pan troglodytes GN=HNRNPA3 PE=4 SV=1 - [H2QJ16_PANTR]	24.57	15	9	9	17	10.5784	10.58	2	3	51.7501	24.57	8	14	293	31.6523	8.88037
G1PNM2	Ubiquitinyl hydrolase 1 OS=Myotis lucifugus GN=USP5 PE=3 SV=1 - [G1PNM2_MYOLU]	24.51	3	1	18	58	97.6153	20.79	15	28	101.604	19.98	13	30	861	96.1965	5.07178
H0YJ63	Activator of 90 kDa heat shock protein ATPase homolog 1 (Fragment) OS=Homo sapiens GN=AHSA1 PE=1 SV=1 - [H0YJ63_HUMAN]	24.44	6	1	1	2					12.6628	24.44	1	2	90	10.135	7.03467
P00338	L-lactate dehydrogenase A chain OS=Homo sapiens GN=LDHA PE=1 SV=2 - [LDHA_HUMAN]	24.4	29	8	8	12	8.406	10.84	4	4	19.2651	24.4	7	8	332	36.6654	8.26514
P30050	60S ribosomal protein L12 OS=Homo sapiens GN=RPL12 PE=1 SV=1 - [RL12_HUMAN]	24.24	34	3	3	4	7.22354	18.79	2	2	6.70898	15.15	2	2	165	17.8075	9.42236
G1P343	Uncharacterized protein (Fragment) OS=Myotis lucifugus GN=RPS25 PE=4 SV=1 - [G1P343_MYOLU]	24	5	4	4	9	7.08516	15.2	2	3	14.6135	24	4	6	125	13.7307	10.1108
A0A0A0MSI0	Peroxiredoxin-1 (Fragment) OS=Homo sapiens GN=PRDX1 PE=1 SV=1 - [A0A0A0MSI0_HUMAN]	23.98	14	3	5	17	33.3312	23.98	5	10	21.3913	17.54	3	7	171	18.9637	6.91748
G1NVA3	Uncharacterized protein (Fragment) OS=Myotis lucifugus PE=4 SV=1 - [G1NVA3_MYOLU]	23.93	10	3	3	15	41.4785	23.93	3	11	12.2589	23.93	3	4	117	13.3872	9.90576
K9J957	Proteasome activator complex subunit 3 OS=Homo sapiens GN=PSME3 PE=1 SV=1 - [K9J957_HUMAN]	23.81	18	4	4	6	5.32417	12.99	2	2	13.3902	17.32	3	4	231	26.8502	5.93506
Q45KI0	Trypsin I (Fragment) OS=Homo sapiens GN=PRSS1 PE=4 SV=1 - [Q45KI0_HUMAN]	23.81	19	1	1	12	28.7217	23.81	1	7	18.8921	23.81	1	5	84	9.16193	9.99365
Q86W19	Protease serine 1 (Fragment) OS=Homo sapiens GN=PRSS1 PE=4 SV=1 - [Q86W19_HUMAN]	23.81	1	1	1	1					2.05926	23.81	1	1	84	9.23391	9.46631
Q59GS3	Proteasome 26S ATPase subunit 5 variant (Fragment) OS=Homo sapiens PE=2 SV=1 - [Q59GS3_HUMAN]	23.77	178	4	5	11	2.63605	3.77	1	1	31.2943	23.77	5	10	345	38.7364	6.46826
P05109	Protein S100-A8 OS=Homo sapiens GN=S100A8 PE=1 SV=1 - [S10A8_HUMAN]	23.66	1	2	2	5	7.97417	23.66	2	3	4.84149	11.83	1	2	93	10.8276	7.03467
A5A6M5	Keratin, type I cuticular Ha1 OS=Pan troglodytes GN=KRT31 PE=2 SV=1 - [K1H1_PANTR]	23.56	45	1	7	16	35.178	23.56	7	16		0			416	47.2171	4.88135
E9PK91	Bcl-2-associated transcription factor 1 OS=Homo sapiens GN=BCLAF1 PE=1 SV=1 - [E9PK91_HUMAN]	23.54	10	1	18	173	289.632	21.81	17	97	239.308	19.29	14	76	871	100.346	9.94971
H2Q3Y5	Uncharacterized protein OS=Pan troglodytes GN=C11H11orf84 PE=4 SV=1 - [H2Q3Y5_PANTR]	23.43	5	5	5	12	34.938	23.43	5	12					350	37.4748	5.32568
A1AIE2	Soluble pyridine nucleotide transhydrogenase OS=Escherichia coli O1:K1 / APEC GN=sthA PE=3 SV=1 - [STHA_ECOK1]	23.39	17	6	6	12	22.0339	21.03	5	7	9.54994	11.37	4	5	466	51.5278	6.56592
Q9BX40	Protein LSM14 homolog B OS=Homo sapiens GN=LSM14B PE=1 SV=1 - [LS14B_HUMAN]	23.38	13	3	4	9	12.7812	23.38	4	4	19.5165	23.38	4	5	385	42.0453	9.68604
O00361	p40 OS=Homo sapiens PE=4 SV=1 - [O00361_HUMAN]	23.37	26	7	7	14	21.3632	16.57	5	7	20.4757	19.23	5	7	338	40.0167	9.51025
A0A086C285	30S ribosomal protein S10 OS=Pseudomonas aeruginosa VRFPA01 GN=rpsJ PE=3 SV=1 - [A0A086C285_PSEAI]	23.3	4	2	2	2	2.3293	9.71	1	1	2.36024	13.59	1	1	103	11.7594	9.77393
D6RAE9	Sideroflexin-1 OS=Homo sapiens GN=SFXN1 PE=1 SV=1 - [D6RAE9_HUMAN]	23.21	6	1	1	1	2.17591	23.21	1	1					56	6.5914	8.67529
Q659G6	Putative uncharacterized protein DKFZp586L2022 (Fragment) OS=Homo sapiens GN=DKFZp586L2022 PE=2 SV=1 - [Q659G6_HUMAN]	23.21	7	2	2	2	2.74012	23.21	1	1	2.69999	21.43	1	1	56	5.72325	10.6821
E5RJD2	2,4-dienoyl-CoA reductase, mitochondrial (Fragment) OS=Homo sapiens GN=DECR1 PE=1 SV=1 - [E5RJD2_HUMAN]	23.18	11	2	2	3	7.54788	23.18	2	2	4.75613	14.57	1	1	151	15.8883	8.85107
B3KM81	cDNA FLJ10471 fis, clone NT2RP2000045, highly similar to DnaJ homolog subfamily A member 3, mitochondrial OS=Homo sapiens PE=2 SV=1 - [B3KM81_HUMAN]	23.18	11	7	7	15	6.87873	7.73	2	3	31.4655	23.18	7	12	453	49.5521	9.34912
W1XP17	ATP-dependent protease subunit HslV (Fragment) OS=human gut metagenome GN=Q604_UNBC13420G0002 PE=4 SV=1 - [W1XP17_9ZZZZ]	22.92	5	1	1	1	2.5771	22.92	1	1					48	5.33568	4.88135
H2QNE7	Signal recognition particle receptor, B subunit OS=Pan troglodytes GN=SRPRB PE=2 SV=1 - [H2QNE7_PANTR]	22.88	9	2	4	6	6.71521	12.18	2	2	15.511	17.71	3	4	271	29.6877	9.0415
A0A0A8UG36	Putative DNA-binding transcriptional regulator OS=Escherichia coli O26:H11 GN=yeiE PE=4 SV=1 - [A0A0A8UG36_ECOLX]	22.87	10	4	4	8	11.6306	19.45	3	4	13.9466	15.02	3	4	293	32.7023	6.85889
A0N586	Anti-CD4 mAb M-T151 variable region light chain (Fragment) OS=Mus sp. GN=Ig VL PE=2 SV=1 - [A0N586_9MURI]	22.83	1	2	2	4	5.69475	22.83	2	2	4.60098	6.3	1	2	127	13.9798	7.03467
Q9NZ23	Drug-sensitive protein 1 OS=Homo sapiens GN=YA61 PE=2 SV=1 - [Q9NZ23_HUMAN]	22.79	1	2	2	5	7.29104	22.79	2	3	5.73368	11.03	1	2	136	14.8577	7.50342
H0VH84	Uncharacterized protein OS=Cavia porcellus GN=Ddx6 PE=3 SV=1 - [H0VH84_CAVPO]	22.72	12	7	7	19	32.7372	22.72	7	10	33.198	17.83	5	9	471	53.0406	8.80713
H0UXT3	Arp2/3 complex 34 kDa subunit OS=Cavia porcellus GN=ARPC2 PE=3 SV=1 - [H0UXT3_CAVPO]	22.67	15	4	4	7	7.62328	22.67	4	4	8.3238	19.67	3	3	300	34.2955	7.35693
E9PPQ0	Mitochondrial fission regulator 1-like (Fragment) OS=Homo sapiens GN=MTFR1L PE=1 SV=1 - [E9PPQ0_HUMAN]	22.64	15	1	1	1					2.481	22.64	1	1	53	5.80518	9.70068
I3L2R3	Nuclear distribution protein nudE homolog 1 (Fragment) OS=Homo sapiens GN=NDE1 PE=1 SV=1 - [I3L2R3_HUMAN]	22.63	31	2	2	2					7.80239	22.63	2	2	137	14.1785	9.68604
A0A086BWX6	Rod shape-determining protein MreB OS=Pseudomonas aeruginosa VRFPA01 GN=G039_0321185 PE=4 SV=1 - [A0A086BWX6_PSEAI]	22.61	7	5	5	9	17.8129	22.61	5	6	9.3633	11.01	3	3	345	36.9533	5.38916
F8WE65	Peptidyl-prolyl cis-trans isomerase OS=Homo sapiens GN=PPIA PE=1 SV=1 - [F8WE65_HUMAN]	22.5	14	4	4	11	11.1343	22.5	4	5	13.644	17.5	3	6	120	13.0133	6.771
G1T4R6	Uncharacterized protein OS=Oryctolagus cuniculus GN=KRT16 PE=3 SV=2 - [G1T4R6_RABIT]	22.49	52	1	10	58	82.2217	22.49	10	35	65.0636	16.26	7	23	449	49.5355	5.18604
Q9UJZ1	Stomatin-like protein 2, mitochondrial OS=Homo sapiens GN=STOML2 PE=1 SV=1 - [STML2_HUMAN]	22.47	8	5	5	10	17.7076	22.47	5	6	14.5422	17.98	4	4	356	38.5102	7.38623
H2QMZ9	Coproporphyrinogen oxidase OS=Pan troglodytes GN=CPOX PE=2 SV=1 - [H2QMZ9_PANTR]	22.47	27	8	8	15	31.7977	19.82	7	9	19.1627	13	4	6	454	50.2851	8.39697
Q9BRL5	CALM3 protein OS=Homo sapiens PE=1 SV=1 - [Q9BRL5_HUMAN]	22.45	40	3	3	13	18.6076	22.45	3	5	27.6573	22.45	3	8	147	16.4959	4.4624
G1PTT5	Uncharacterized protein OS=Myotis lucifugus GN=DNAJA1 PE=3 SV=1 - [G1PTT5_MYOLU]	22.42	10	5	5	8		0			25.2011	22.42	5	8	397	44.8094	7.07861
C9JTK6	Obg-like ATPase 1 (Fragment) OS=Homo sapiens GN=OLA1 PE=1 SV=1 - [C9JTK6_HUMAN]	22.41	25	2	2	3	5.4289	22.41	2	2	3.98865	12.93	1	1	116	12.2944	8.90967
B4DUQ1	cDNA FLJ54552, highly similar to Heterogeneous nuclear ribonucleoprotein K OS=Homo sapiens PE=2 SV=1 - [B4DUQ1_HUMAN]	22.32	14	7	7	17	46.2199	22.32	7	13	13.2404	14.35	4	4	439	48.4802	5.92236
H2RDI6	Uncharacterized protein OS=Pan troglodytes GN=FAM98B PE=4 SV=1 - [H2RDI6_PANTR]	22.25	20	1	6	16	19.0672	19.56	5	6	28.9657	22.25	6	10	409	43.9049	8.1333
A0A087WX29	TAR DNA-binding protein 43 (Fragment) OS=Homo sapiens GN=TARDBP PE=1 SV=1 - [A0A087WX29_HUMAN]	22.22	30	3	3	9	15.2988	22.22	3	4	19.7007	22.22	3	5	243	26.7264	7.76709
Q8JHI0	Solute carrier family 25 (mitochondrial carrier; adenine nucleotide translocator), member 5 OS=Danio rerio GN=slc25a5 PE=1 SV=1 - [Q8JHI0_DANRE]	22.15	32	1	7	33	25.5842	17.45	4	10	60.1605	22.15	7	23	298	32.7421	9.75928
Q9Y3A4	Ribosomal RNA-processing protein 7 homolog A OS=Homo sapiens GN=RRP7A PE=1 SV=2 - [RRP7A_HUMAN]	22.14	9	5	5	9	18.3548	22.14	5	6	8.76284	15.71	3	3	280	32.314	9.5835
I7JA08	Histone H2A OS=Babesia microti (strain RI) GN=BMR1_02g01930 PE=3 SV=1 - [I7JA08_BABMR]	22.14	1	1	1	5	2.02206	22.14	1	1	8.8254	22.14	1	4	131	14.4549	10.5942
A8K651	cDNA FLJ75700, highly similar to Homo sapiens complement component 1, q subcomponent binding protein (C1QBP), nuclear gene encoding mitochondrial protein, mRNA OS=Homo sapiens PE=2 SV=1 - [A8K651_HUMAN]	21.99	8	5	5	10	16.4068	16.67	4	5	17.0256	21.99	5	5	282	31.3606	4.84326
B7Z377	cDNA FLJ57937, highly similar to DNA-directed RNA polymerase II 33 kDa polypeptide (EC 2.7.7.6) OS=Homo sapiens PE=2 SV=1 - [B7Z377_HUMAN]	21.94	8	2	2	3	3.3749	9.68	1	1	7.86927	21.94	2	2	155	17.4688	4.62744
B7Z2F4	T-complex protein 1 subunit delta OS=Homo sapiens PE=2 SV=1 - [B7Z2F4_HUMAN]	21.85	14	5	5	8	15.2527	15.17	3	4	13.927	18.77	4	4	389	42.2726	7.60596
F8VZ29	Ubiquitin-conjugating enzyme E2 N OS=Homo sapiens GN=UBE2N PE=1 SV=1 - [F8VZ29_HUMAN]	21.84	18	2	2	4	6.17273	21.84	2	2	8.16574	21.84	1	2	87	9.73792	7.88428
A0A081UY40	30S ribosomal protein S11 OS=Aeromonas hydrophila GN=rpsK PE=3 SV=1 - [A0A081UY40_AERHY]	21.71	11	2	2	6	9.93877	21.71	2	3	7.97906	9.3	1	3	129	13.8264	11.3706
G1U2Q5	Uncharacterized protein OS=Oryctolagus cuniculus PE=4 SV=1 - [G1U2Q5_RABIT]	21.71	17	2	2	5					12.898	21.71	2	5	152	17.225	9.83252
B4DP56	cDNA FLJ52237, highly similar to Creatine kinase B-type (EC 2.7.3.2) OS=Homo sapiens PE=2 SV=1 - [B4DP56_HUMAN]	21.68	16	5	5	9	9.17823	12.72	3	4	14.6077	17.05	4	5	346	38.6694	5.38916
C8CHJ6	Galactokinase (Fragment) OS=Homo sapiens GN=GALK PE=4 SV=1 - [C8CHJ6_HUMAN]	21.67	7	1	1	1					2.06582	21.67	1	1	60	6.74357	5.33838
P16152	Carbonyl reductase [NADPH] 1 OS=Homo sapiens GN=CBR1 PE=1 SV=3 - [CBR1_HUMAN]	21.66	23	5	5	8	14.5469	17.33	4	5	7.88647	14.08	3	3	277	30.3559	8.32373
I7G8U9	Macaca fascicularis brain cDNA clone: QmoA-12234, similar to human enolase 1, (alpha) (ENO1), mRNA, RefSeq: NM_001428.2 OS=Macaca fascicularis PE=2 SV=1 - [I7G8U9_MACFA]	21.66	46	6	6	10	11.9823	9.91	3	3	16.6477	15.9	4	7	434	47.1253	7.38623
H0V5B6	Uncharacterized protein OS=Cavia porcellus GN=EIF4E PE=3 SV=1 - [H0V5B6_CAVPO]	21.66	20	4	4	13	7.41238	21.66	4	6	12.2296	16.59	3	7	217	25.0745	6.15088
A4D0S8	Dedicator of cytokinesis 4 OS=Homo sapiens GN=DOCK4 PE=3 SV=1 - [A4D0S8_HUMAN]	21.62	30	26	26	44	132.766	21.62	26	43	1.64967	0.46	1	1	1966	225.078	7.59131
G2HJ20	Protein disulfide-isomerase A6 OS=Pan troglodytes GN=PDIA6 PE=2 SV=1 - [G2HJ20_PANTR]	21.59	5	5	5	6					20.5473	21.59	5	6	440	48.0613	5.08447
F5GYN4	Ubiquitin thioesterase OTUB1 OS=Homo sapiens GN=OTUB1 PE=1 SV=1 - [F5GYN4_HUMAN]	21.58	17	4	4	10	9.76487	21.58	4	4	17.5917	21.58	4	6	241	28.033	5.2876
Q5T7N0	60S ribosomal protein L5 (Fragment) OS=Homo sapiens GN=RPL5 PE=1 SV=2 - [Q5T7N0_HUMAN]	21.54	13	2	2	3	2.90382	13.85	1	1	5.39845	21.54	2	2	130	14.1052	7.78174
Q05BS0	Eukaryotic translation initiation factor 3 subunit A (Fragment) OS=Homo sapiens GN=EIF3A PE=2 SV=1 - [Q05BS0_HUMAN]	21.45	14	10	10	15	20.2654	16.88	8	8	19.4721	14.2	7	7	634	74.6201	8.49951
A0A0U1RQJ0	Probable ATP-dependent RNA helicase DDX17 (Fragment) OS=Homo sapiens GN=DDX17 PE=1 SV=1 - [A0A0U1RQJ0_HUMAN]	21.43	33	1	1	2	3.34825	21.43	1	1	3.22536	21.43	1	1	56	6.08304	8.23584
W2T064	Actin OS=Necator americanus GN=NECAME_03869 PE=3 SV=1 - [W2T064_NECAM]	21.35	53	1	7	102	141.442	21.35	7	53	140.718	17.97	5	49	384	42.9466	5.90967
G1U4A0	Uncharacterized protein OS=Oryctolagus cuniculus GN=FRMD8 PE=4 SV=2 - [G1U4A0_RABIT]	21.33	2	1	9	138	40.6051	4.89	2	13	331.482	21.33	9	125	450	49.7525	6.58057
F5GWF6	T-complex protein 1 subunit beta OS=Homo sapiens GN=CCT2 PE=1 SV=2 - [F5GWF6_HUMAN]	21.32	30	7	7	11	24.7131	19.06	6	7	12.7743	7.55	3	4	530	56.7708	6.44287
H0W8P7	Uncharacterized protein OS=Cavia porcellus GN=ZCCHC3 PE=4 SV=1 - [H0W8P7_CAVPO]	21.22	4	6	6	17	34.1618	21.22	6	10	22.4118	18.83	5	7	377	41.738	8.80713
A0A0C2IPD8	Actin beta/gamma 1 OS=Sporothrix brasiliensis 5110 GN=SPBR_00592 PE=3 SV=1 - [A0A0C2IPD8_9PEZI]	21.11	37	0	6	96	129.593	21.11	6	49	132.335	19.17	5	47	360	40.1202	6.23975
P62333	26S proteasome regulatory subunit 10B OS=Homo sapiens GN=PSMC6 PE=1 SV=1 - [PRS10_HUMAN]	21.08	14	4	7	16	25.2415	14.65	5	7	27.9843	20.31	6	9	389	44.1451	7.48877
G1P935	Uncharacterized protein (Fragment) OS=Myotis lucifugus PE=3 SV=1 - [G1P935_MYOLU]	21.05	19	4	4	10	17.3145	21.05	4	7	7.09916	11.18	2	3	152	17.7049	10.9897
P04181	Ornithine aminotransferase, mitochondrial OS=Homo sapiens GN=OAT PE=1 SV=1 - [OAT_HUMAN]	20.96	23	7	7	10	11.9253	16.4	5	5	14.2954	14.81	5	5	439	48.5042	7.03467
H0W5R1	Uncharacterized protein OS=Cavia porcellus GN=FBLL1 PE=3 SV=1 - [H0W5R1_CAVPO]	20.93	5	1	3	17	22.5221	8.53	2	7	34.4736	20.93	3	10	258	28.312	9.65674
P62136	Serine/threonine-protein phosphatase PP1-alpha catalytic subunit OS=Homo sapiens GN=PPP1CA PE=1 SV=1 - [PP1A_HUMAN]	20.91	90	2	5	13	17.9196	20.91	5	6	19.1604	20.91	5	7	330	37.4878	6.32861
H2R4K7	Uncharacterized protein OS=Pan troglodytes PE=4 SV=1 - [H2R4K7_PANTR]	20.91	9	2	2	3	5.22314	20.91	2	2	3.33505	12.73	1	1	110	12.4004	9.14404
B3KQ51	Serine/threonine-protein phosphatase OS=Homo sapiens PE=2 SV=1 - [B3KQ51_HUMAN]	20.9	31	3	3	7	8.26706	14.75	2	2	18.3585	20.9	3	5	244	28.0717	5.96045
B7Z4V2	cDNA FLJ51907, highly similar to Stress-70 protein, mitochondrial OS=Homo sapiens PE=2 SV=1 - [B7Z4V2_HUMAN]	20.9	25	12	12	26	64.6471	20.9	12	21	14.652	6.47	4	5	665	72.3561	5.93506
H7C123	60S ribosomal protein L10 (Fragment) OS=Homo sapiens GN=RPL10 PE=1 SV=1 - [H7C123_HUMAN]	20.88	29	2	2	8	3.342	12.09	1	1	15.6505	20.88	2	7	91	10.0215	11.8101
H2QQI6	Uncharacterized protein OS=Pan troglodytes GN=SLC25A4 PE=3 SV=1 - [H2QQI6_PANTR]	20.88	43	2	7	29	18.7526	9.43	2	7	57.3936	20.88	7	22	297	32.8871	9.72998
P50402	Emerin OS=Homo sapiens GN=EMD PE=1 SV=1 - [EMD_HUMAN]	20.87	3	5	5	18	16.6342	20.47	4	6	39.5272	20.87	5	12	254	28.9759	5.50342
A0A140TA69	Keratin, type I cuticular Ha4 OS=Homo sapiens GN=KRT34 PE=3 SV=1 - [A0A140TA69_HUMAN]	20.87	4	2	6	10	27.4993	20.87	6	10		0			436	49.3992	5.05908
Q86W42	THO complex subunit 6 homolog OS=Homo sapiens GN=THOC6 PE=1 SV=1 - [THOC6_HUMAN]	20.82	6	4	4	6	9.41464	20.82	4	4	4.70029	12.9	2	2	341	37.511	7.43018
G1NXX5	Uncharacterized protein OS=Myotis lucifugus GN=SF3B6 PE=4 SV=1 - [G1NXX5_MYOLU]	20.8	3	2	2	4	6.68425	20.8	2	2	6.13263	20.8	2	2	125	14.6206	9.24658
F6RFD5	Destrin OS=Homo sapiens GN=DSTN PE=1 SV=1 - [F6RFD5_HUMAN]	20.74	8	2	2	6	8.3575	20.74	2	3	7.72896	20.74	2	3	135	15.3869	8.5874
P55036	26S proteasome non-ATPase regulatory subunit 4 OS=Homo sapiens GN=PSMD4 PE=1 SV=1 - [PSMD4_HUMAN]	20.69	13	6	6	14	21.7102	5.57	2	5	32.3051	19.89	5	9	377	40.7112	4.79248
D6RG13	40S ribosomal protein S3a (Fragment) OS=Homo sapiens GN=RPS3A PE=1 SV=1 - [D6RG13_HUMAN]	20.63	28	5	5	13	30.8941	20.63	5	9	13.0706	17.04	4	4	223	25.5914	9.65674
A1L3B8	Proteasome (Prosome, macropain) 26S subunit, non-ATPase, 7 OS=Mus musculus GN=Psmd7 PE=1 SV=1 - [A1L3B8_MOUSE]	20.56	14	4	4	13	12.9251	16.82	3	4	34.4806	20.56	4	9	321	36.5172	6.771
G1PC40	Uncharacterized protein OS=Myotis lucifugus GN=POLDIP2 PE=4 SV=1 - [G1PC40_MYOLU]	20.44	13	6	6	8	13.229	14.17	4	4	13.1089	13.9	4	4	367	41.7971	8.63135
F1QTP1	Potassium voltage-gated channel, shaker-related subfamily, beta member 1 a OS=Danio rerio GN=kcnab1a PE=4 SV=2 - [F1QTP1_DANRE]	20.42	4	2	4	6	2.81833	6.31	2	3	0	14.11	2	3	333	37.263	8.51416
Q01804	OTU domain-containing protein 4 OS=Homo sapiens GN=OTUD4 PE=1 SV=4 - [OTUD4_HUMAN]	20.38	11	17	17	40	114.706	20.38	17	35	14.6853	6.82	5	5	1114	123.968	6.7124
P23526	Adenosylhomocysteinase OS=Homo sapiens GN=AHCY PE=1 SV=4 - [SAHH_HUMAN]	20.37	23	7	7	19	22.4763	12.73	5	9	29.5394	20.37	7	10	432	47.6852	6.34131
A0A024RAM4	Microtubule-associated protein 1B, isoform CRA_b OS=Homo sapiens GN=MAP1B PE=4 SV=1 - [A0A024RAM4_HUMAN]	20.3	31	30	30	50	165.412	20.3	30	49	2.41564	0.41	1	1	2468	270.454	4.80518
Q2LDF3	GltA (Fragment) OS=Bartonella vinsonii subsp. arupensis GN=gltA PE=4 SV=1 - [Q2LDF3_BARVI]	20.22	41	1	1	1	4.45143	20.22	1	1					89	9.70271	7.79639
G1P6A9	Uncharacterized protein OS=Myotis lucifugus GN=KRT10 PE=3 SV=1 - [G1P6A9_MYOLU]	20.18	55	1	13	170	228.856	20.18	13	92	214.073	14.56	10	78	570	58.3476	5.12256
H0UZS5	Uncharacterized protein OS=Cavia porcellus GN=USP7 PE=3 SV=1 - [H0UZS5_CAVPO]	20.09	19	16	16	24	4.49244	2.03	1	1	58.1794	20.09	16	23	1085	126.275	5.71924
P05787	Keratin, type II cytoskeletal 8 OS=Homo sapiens GN=KRT8 PE=1 SV=7 - [K2C8_HUMAN]	20.08	59	6	9	101	93.2583	6.63	3	40	149.402	17.6	8	61	483	53.6711	5.59229
A0A1U9X977	PRRC2A OS=Homo sapiens PE=4 SV=1 - [A0A1U9X977_HUMAN]	20.07	28	23	25	81	117.507	16.83	20	40	130.946	14.97	20	41	2157	228.682	9.43701
K7EQ16	UV excision repair protein RAD23 homolog A (Fragment) OS=Homo sapiens GN=RAD23A PE=1 SV=1 - [K7EQ16_HUMAN]	20	8	1	1	1	4.09335	20	1	1					150	16.6992	4.04346
G1Q5S2	Uncharacterized protein OS=Myotis lucifugus PE=4 SV=1 - [G1Q5S2_MYOLU]	20	1	1	1	1		0			0	20	1	1	55	6.54126	10.1255
A6MK65	Staphylococcal nuclease domain containing protein 1-like protein (Fragment) OS=Callithrix jacchus PE=2 SV=1 - [A6MK65_CALJA]	20	12	1	1	1					0	20	1	1	65	7.42377	5.45264
B4DE30	cDNA FLJ51711, highly similar to T-complex protein 1 subunit epsilon OS=Homo sapiens PE=2 SV=1 - [B4DE30_HUMAN]	19.96	21	4	4	11	25.444	19.96	4	7	13.8583	3.65	1	4	466	51.5117	5.52881
Q96AG4	Leucine-rich repeat-containing protein 59 OS=Homo sapiens GN=LRRC59 PE=1 SV=1 - [LRC59_HUMAN]	19.87	6	4	4	10	9.51678	13.03	3	4	13.8259	19.87	4	6	307	34.9089	9.56885
A0A024L7Z4	Aspartokinase OS=Escherichia coli GN=lysC PE=3 SV=1 - [A0A024L7Z4_ECOLX]	19.82	16	7	7	31	22.5496	7.8	2	7	87.6356	19.82	7	24	449	48.5015	5.10986
F5H8H2	Mevalonate kinase OS=Homo sapiens GN=MVK PE=1 SV=1 - [F5H8H2_HUMAN]	19.77	13	4	4	6	9.76021	13.66	3	3	10.3637	12.79	3	3	344	37.1486	7.07861
B2R7W0	cDNA, FLJ93628, Homo sapiens methylene tetrahydrofolate dehydrogenase (NAD+dependent), methenyltetrahydrofolate cyclohydrolase (MTHFD2),nuclear gene encoding mitochondrial protein, mRNA OS=Homo sapiens PE=1 SV=1 - [B2R7W0_HUMAN]	19.77	17	4	4	7	15.1105	13.08	3	4	10.0359	13.37	3	3	344	37.2969	8.73389
Q01082	Spectrin beta chain, non-erythrocytic 1 OS=Homo sapiens GN=SPTBN1 PE=1 SV=2 - [SPTB2_HUMAN]	19.71	44	33	33	51	135.894	19.33	32	44	17.7482	4.4	7	7	2364	274.439	5.56689
C9JGM0	Fumarylacetoacetate hydrolase domain-containing protein 2A (Fragment) OS=Homo sapiens GN=FAHD2A PE=1 SV=1 - [C9JGM0_HUMAN]	19.69	7	2	2	2	2.88044	11.02	1	1	3.3699	8.66	1	1	127	14.0125	9.83252
B4DWQ5	cDNA FLJ51655, highly similar to Actin-like protein 2 OS=Homo sapiens PE=2 SV=1 - [B4DWQ5_HUMAN]	19.67	35	4	5	6	5.91629	12.13	3	3	6.57477	12.13	3	3	305	34.4859	5.71924
G7YXS0	Actin beta/gamma 1 OS=Clonorchis sinensis GN=CLF_113153 PE=3 SV=1 - [G7YXS0_CLOSI]	19.66	9	1	4	47	62.5486	19.66	4	24	63.233	10.68	3	23	234	26.5001	5.04639
U4V0R6	Nitrogen regulatory protein P-II 1 OS=Ochrobactrum intermedium 229E GN=Q644_10335 PE=3 SV=1 - [U4V0R6_9RHIZ]	19.64	7	1	2	3	5.31433	19.64	2	2	2.79255	9.82	1	1	112	12.2747	5.60498
X6R5E5	Ubiquitin-associated domain-containing protein 2 (Fragment) OS=Homo sapiens GN=UBAC2 PE=1 SV=1 - [X6R5E5_HUMAN]	19.61	5	3	3	4	2.64496	8.82	1	1	7.91449	19.61	3	3	204	23.0596	8.66064
E9QIF2	Proteasome subunit alpha type (Fragment) OS=Danio rerio GN=psma5 PE=1 SV=1 - [E9QIF2_DANRE]	19.58	26	3	3	6	14.3944	14.17	2	4	5.86521	13.33	2	2	240	26.2771	4.81787
Q00610	Clathrin heavy chain 1 OS=Homo sapiens GN=CLTC PE=1 SV=5 - [CLH1_HUMAN]	19.52	38	24	24	48	55.9742	10.75	14	19	91.5069	17.19	20	29	1675	191.493	5.69385
H0YB39	Heterogeneous nuclear ribonucleoprotein H (Fragment) OS=Homo sapiens GN=HNRNPH1 PE=1 SV=1 - [H0YB39_HUMAN]	19.49	26	2	3	19	37.0589	12.27	2	9	40.1596	19.49	3	10	277	30.4745	8.01611
G3V4X5	Proteasome endopeptidase complex OS=Homo sapiens GN=PSMA3 PE=1 SV=1 - [G3V4X5_HUMAN]	19.44	7	3	3	9	7.61976	7.78	1	3	15.7383	19.44	3	6	180	20.275	5.09717
G1TRG8	Uncharacterized protein OS=Oryctolagus cuniculus GN=GNAI2 PE=4 SV=1 - [G1TRG8_RABIT]	19.44	101	2	5	15	11.9652	11.55	3	5	29.1256	15.21	4	10	355	40.4551	5.5415
B5ABI3	YB1 OS=Cavia porcellus GN=YB1 PE=2 SV=1 - [B5ABI3_CAVPO]	19.44	14	1	3	33	59.121	19.44	3	16	70.7217	19.44	3	17	324	35.9637	9.87646
H0VH21	Uncharacterized protein OS=Cavia porcellus GN=VDAC3 PE=4 SV=1 - [H0VH21_CAVPO]	19.43	11	4	5	17	27.0899	19.43	5	8	28.6911	19.43	5	9	283	30.5233	8.77783
B4DL87	cDNA FLJ52243, highly similar to Heat-shock protein beta-1 OS=Homo sapiens PE=2 SV=1 - [B4DL87_HUMAN]	19.41	5	2	2	3	7.0428	19.41	2	2	3.49839	9.41	1	1	170	18.5245	6.94678
B4DJ75	Serine/threonine-protein phosphatase OS=Homo sapiens PE=2 SV=1 - [B4DJ75_HUMAN]	19.4	89	1	4	11	14.9336	19.4	4	5	16.7131	19.4	4	6	299	34.099	6.16357
Q99848	Probable rRNA-processing protein EBP2 OS=Homo sapiens GN=EBNA1BP2 PE=1 SV=2 - [EBP2_HUMAN]	19.28	10	4	4	10	10.757	12.09	3	4	17.4674	19.28	4	6	306	34.8304	10.0962
T1QA01	Ribulose bisphosphate carboxylase large chain (Fragment) OS=Brabejum stellatifolium GN=rbcL PE=3 SV=1 - [T1QA01_9MAGN]	19.19	342	3	3	6					12.3881	19.19	3	6	172	18.9487	6.56592
B4DN39	cDNA FLJ53065, highly similar to T-complex protein 1 subunit zeta OS=Homo sapiens PE=2 SV=1 - [B4DN39_HUMAN]	19.02	11	5	5	8	13.7827	19.02	4	4	7.54211	16.97	4	4	389	42.8875	6.62451
H3BP14	Protein spinster homolog 1 (Fragment) OS=Homo sapiens GN=SPNS1 PE=1 SV=1 - [H3BP14_HUMAN]	19.01	9	1	1	1					0	19.01	1	1	142	15.4179	5.37646
B0S610	Heat shock cognate 70-kd protein,-like OS=Danio rerio GN=hsp70l PE=3 SV=1 - [B0S610_DANRE]	18.97	66	2	9	38	54.3163	12.29	6	17	64.2629	14.77	8	21	643	70.498	5.65576
B0AZT7	cDNA, FLJ79527, moderately similar to Uroporphyrinogen decarboxylase OS=Homo sapiens PE=2 SV=1 - [B0AZT7_HUMAN]	18.97	8	1	1	1	2.96042	18.97	1	1		0			116	12.9318	9.45166
F8W493	14-3-3 protein beta/alpha-B OS=Danio rerio GN=ywhabb PE=1 SV=1 - [F8W493_DANRE]	18.97	119	1	3	7	4.74664	9.23	2	2	11.7996	14.87	2	5	195	21.8847	4.61475
Q08211	ATP-dependent RNA helicase A OS=Homo sapiens GN=DHX9 PE=1 SV=4 - [DHX9_HUMAN]	18.9	11	17	17	41	49.9586	13.7	13	17	75.1805	17.09	15	24	1270	140.869	6.84424
G1QC47	Uncharacterized protein OS=Myotis lucifugus GN=RHOG PE=3 SV=1 - [G1QC47_MYOLU]	18.85	5	2	2	2	2.84434	9.95	1	1	2.06839	8.9	1	1	191	21.2669	8.11865
C9JFR7	Cytochrome c (Fragment) OS=Homo sapiens GN=CYCS PE=1 SV=1 - [C9JFR7_HUMAN]	18.81	14	2	2	2					3.94561	18.81	2	2	101	11.326	9.65674
G3XAN0	40S ribosomal protein S20 OS=Homo sapiens GN=RPS20 PE=1 SV=1 - [G3XAN0_HUMAN]	18.75	10	1	1	7	11.7673	18.75	1	4	9.58679	18.75	1	3	64	7.24285	8.92432
A0A140VJS7	Testicular tissue protein Li 153 OS=Homo sapiens PE=2 SV=1 - [A0A140VJS7_HUMAN]	18.75	6	2	2	5	6.27281	8.75	1	2	10.2709	18.75	2	3	160	17.7705	7.23975
B2R7M3	cDNA, FLJ93510, highly similar to Homo sapiens JTV1 gene (JTV1), mRNA OS=Homo sapiens PE=2 SV=1 - [B2R7M3_HUMAN]	18.75	8	4	4	8	17.1212	18.75	4	5	8.2016	10.63	2	3	320	35.4254	8.41162
A0A0S2Z3S5	GNAS complex locus isoform 2 (Fragment) OS=Homo sapiens GN=GNAS PE=2 SV=1 - [A0A0S2Z3S5_HUMAN]	18.68	97	6	7	17	13.8636	7.89	3	5	29.5259	18.68	7	12	380	44.2383	6.29053
B1AQ78	Keratin 19 OS=Mus musculus GN=Krt19 PE=1 SV=1 - [B1AQ78_MOUSE]	18.61	53	1	8	27	24.3641	11.17	6	15	27.1396	13.65	5	12	403	44.5147	5.38916
D6R9P3	Heterogeneous nuclear ribonucleoprotein A/B OS=Homo sapiens GN=HNRNPAB PE=1 SV=1 - [D6R9P3_HUMAN]	18.57	17	3	4	11	8.33714	8.57	2	3	25.3077	18.57	4	8	280	30.284	7.91357
B4DXP9	cDNA FLJ52800, highly similar to Alpha-centractin OS=Homo sapiens PE=2 SV=1 - [B4DXP9_HUMAN]	18.54	25	3	4	4	7.35715	13.37	3	3	3.15183	5.17	1	1	329	37.4573	6.37939
H7C3I1	Hsc70-interacting protein (Fragment) OS=Homo sapiens GN=ST13 PE=1 SV=1 - [H7C3I1_HUMAN]	18.49	19	3	3	3	4.68761	9.59	1	1	3.8717	15.75	2	2	146	16.3191	4.88135
P26373	60S ribosomal protein L13 OS=Homo sapiens GN=RPL13 PE=1 SV=4 - [RL13_HUMAN]	18.48	13	4	4	6	2.94417	4.74	1	1	12.3014	18.48	4	5	211	24.2465	11.6489
A1AGJ7	50S ribosomal protein L5 OS=Escherichia coli O1:K1 / APEC GN=rplE PE=3 SV=1 - [RL5_ECOK1]	18.44	3	2	2	2	5.02615	18.44	2	2					179	20.2887	9.48096
A0A161HXV9	Molecular chaperone DnaJ OS=Anaplasma phagocytophilum str. Norway variant2 GN=P029_00300 PE=4 SV=1 - [A0A161HXV9_ANAPH]	18.42	3	1	1	1					2.30259	18.42	1	1	76	8.27716	9.99365
G1PPJ2	Uncharacterized protein OS=Myotis lucifugus GN=SNRPA1 PE=4 SV=1 - [G1PPJ2_MYOLU]	18.4	13	5	5	8	7.79353	14.8	3	3	14.3518	14.8	4	5	250	27.7768	8.63135
H2Q2D5	Arginine vasopressin-induced 1 OS=Pan troglodytes GN=AVPI1 PE=2 SV=1 - [H2Q2D5_PANTR]	18.37	1	1	1	1					3.44535	18.37	1	1	147	16.7758	10.6235
J3QT28	Mitotic checkpoint protein BUB3 (Fragment) OS=Homo sapiens GN=BUB3 PE=1 SV=1 - [J3QT28_HUMAN]	18.35	16	4	4	10	14.0957	18.35	4	5	14.4617	18.35	4	5	278	31.6837	8.1626
M0R2L9	40S ribosomal protein S19 (Fragment) OS=Homo sapiens GN=RPS19 PE=1 SV=1 - [M0R2L9_HUMAN]	18.31	8	1	1	2	3.12797	18.31	1	1	3.23935	18.31	1	1	71	8.18427	8.88037
C9JLU1	DNA-directed RNA polymerases I, II, and III subunit RPABC3 (Fragment) OS=Homo sapiens GN=POLR2H PE=1 SV=8 - [C9JLU1_HUMAN]	18.24	4	1	1	1					3.70879	18.24	1	1	148	16.9143	4.67822
H0YHS6	Tyrosine--tRNA ligase (Fragment) OS=Homo sapiens GN=YARS2 PE=1 SV=1 - [H0YHS6_HUMAN]	18.21	4	3	3	3		0			11.0864	18.21	3	3	291	32.1645	8.39697
Q86TY5	Galectin OS=Homo sapiens PE=2 SV=1 - [Q86TY5_HUMAN]	18.18	11	2	2	3	2.50708	9.09	1	1	5.74599	18.18	2	2	121	13.8882	9.15869
A0A1V2G3Z9	Elongation factor Tu (Fragment) OS=Escherichia coli GN=BXT93_23780 PE=4 SV=1 - [A0A1V2G3Z9_ECOLX]	18.15	36	4	5	15	19.1867	18.15	5	6	29.3645	18.15	4	9	336	37.275	4.93213
H0YL52	Tropomyosin alpha-1 chain (Fragment) OS=Homo sapiens GN=TPM1 PE=1 SV=1 - [H0YL52_HUMAN]	18.11	88	4	9	21	34.7109	18.11	8	12	26.3991	13.96	5	9	265	30.4724	4.69092
D6RGZ2	THO complex subunit 3 OS=Homo sapiens GN=THOC3 PE=1 SV=1 - [D6RGZ2_HUMAN]	18.1	8	2	2	3	2.49846	8.57	1	1	4.56681	18.1	2	2	105	11.0546	10.1548
B4E1H9	Phosphoglycerate kinase OS=Homo sapiens PE=2 SV=1 - [B4E1H9_HUMAN]	18.04	24	4	4	10	6.98783	8.26	2	2	24.3793	18.04	4	8	327	35.0231	8.32373
G1TXF5	Uncharacterized protein OS=Oryctolagus cuniculus PE=3 SV=1 - [G1TXF5_RABIT]	18.03	12	2	2	12	3.39527	10.66	1	1	17.6643	18.03	2	11	122	14.3232	10.6235
K9IL73	Putative actin OS=Desmodus rotundus PE=2 SV=1 - [K9IL73_DESRO]	18.01	30	4	4	5					16.302	18.01	4	5	472	53.8949	5.50342
A0A0A8U936	4-hydroxy-tetrahydrodipicolinate reductase OS=Escherichia coli O26:H11 GN=dapB PE=3 SV=1 - [A0A0A8U936_ECOLX]	17.95	16	3	3	9	8.75399	11.36	2	3	21.7585	17.95	3	6	273	28.7116	5.75732
H0VAM9	Uncharacterized protein OS=Cavia porcellus GN=CAPZA2 PE=3 SV=1 - [H0VAM9_CAVPO]	17.92	15	2	3	8	15.7004	17.92	3	4	10.986	17.92	3	4	279	32.1733	5.8335
H3BMQ1	Prefoldin subunit 5 OS=Homo sapiens GN=PFDN5 PE=1 SV=1 - [H3BMQ1_HUMAN]	17.86	5	1	1	1					2.04356	17.86	1	1	84	9.52892	8.45557
P15924	Desmoplakin OS=Homo sapiens GN=DSP PE=1 SV=3 - [DESP_HUMAN]	17.83	14	33	33	73	79.3178	9.86	19	26	150.974	14.66	27	47	2871	331.569	6.81494
C7BI65	Peptidyl-prolyl cis-trans isomerase OS=Photorhabdus asymbiotica subsp. asymbiotica (strain ATCC 43949 / 3105-77) GN=slyD PE=3 SV=1 - [C7BI65_PHOAA]	17.82	1	1	1	1					0	17.82	1	1	202	21.5881	4.94482
Q2YS46	C447E6.1 (Nucleotide binding protein 1 (E.coli MinD like) ) (Fragment) OS=Homo sapiens GN=NUBP1 PE=3 SV=1 - [Q2YS46_HUMAN]	17.74	13	3	3	3					7.16309	17.74	3	3	265	28.2046	6.29053
A0A087X1A9	Vesicle-trafficking protein SEC22b (Fragment) OS=Homo sapiens GN=SEC22B PE=1 SV=1 - [A0A087X1A9_HUMAN]	17.72	5	1	1	1	3.43358	17.72	1	1					79	8.77644	5.18604
H0V1T2	Uncharacterized protein OS=Cavia porcellus GN=S100A10 PE=3 SV=1 - [H0V1T2_CAVPO]	17.71	6	1	1	2					6.92396	17.71	1	2	96	11.1734	7.29834
A5D904	RPS9 protein (Fragment) OS=Homo sapiens GN=RPS9 PE=2 SV=1 - [A5D904_HUMAN]	17.7	30	2	2	3	4.30749	17.7	2	2	1.99941	7.96	1	1	113	13.1533	10.4478
D6RAW1	General transcription factor IIH subunit 2 OS=Homo sapiens GN=GTF2H2C PE=4 SV=1 - [D6RAW1_HUMAN]	17.65	17	1	1	2	1.87891	17.65	1	1	2.1116	17.65	1	1	51	6.19207	5.45264
K9IK75	Putative ferm domain-containing protein krit1 OS=Desmodus rotundus PE=2 SV=1 - [K9IK75_DESRO]	17.63	2	1	7	37	1.96507	1.72	1	1	55.0447	17.63	7	36	465	51.8012	6.32861
A1AIF7	50S ribosomal protein L10 OS=Escherichia coli O1:K1 / APEC GN=rplJ PE=3 SV=1 - [RL10_ECOK1]	17.58	4	2	2	2	6.01868	17.58	2	2		0			165	17.7004	8.98291
H0VE17	Uncharacterized protein OS=Cavia porcellus GN=PSMD2 PE=4 SV=1 - [H0VE17_CAVPO]	17.58	17	10	10	19	48.8782	17.58	10	15	14.2517	5.49	3	4	893	98.1537	5.12256
G1NZV9	Uncharacterized protein OS=Myotis lucifugus GN=ACTBL2 PE=3 SV=1 - [G1NZV9_MYOLU]	17.57	50	0	4	78	173.876	17.57	4	44	133.432	15.95	3	34	370	40.7545	5.96045
E9PNS3	Toll-interacting protein OS=Homo sapiens GN=TOLLIP PE=1 SV=1 - [E9PNS3_HUMAN]	17.5	7	1	1	1	4.21382	17.5	1	1					80	8.65242	8.35303
E9QGU5	Potassium voltage-gated channel, shaker-related subfamily, beta member 2 b OS=Danio rerio GN=kcnab2b PE=4 SV=1 - [E9QGU5_DANRE]	17.48	4	1	7	59	100.69	17.48	7	30	97.7923	15.53	6	29	412	45.8583	8.89502
A0A0D3QIG7	Recombinase (Fragment) OS=Yersinia aldovae GN=recA PE=3 SV=1 - [A0A0D3QIG7_YERAL]	17.47	83	1	2	2	5.22687	17.47	2	2					166	17.46	5.021
G1NTE8	Uncharacterized protein OS=Myotis lucifugus GN=HOXC6 PE=3 SV=1 - [G1NTE8_MYOLU]	17.45	7	2	2	2	6.04346	17.45	2	2					235	26.8681	9.1001
B4DUR8	T-complex protein 1 subunit gamma OS=Homo sapiens GN=CCT3 PE=1 SV=1 - [B4DUR8_HUMAN]	17.4	14	7	7	8	22.0151	15.2	6	6	6.28884	4.4	2	2	500	55.6387	5.64307
G1TDN6	Uncharacterized protein OS=Oryctolagus cuniculus GN=KRT5 PE=3 SV=1 - [G1TDN6_RABIT]	17.35	11	0	12	110	178.241	15.65	11	64	134.807	14.97	9	46	588	62.2429	7.81104
J3KNJ2	Eukaryotic translation initiation factor 3 subunit M (Fragment) OS=Homo sapiens GN=EIF3M PE=1 SV=1 - [J3KNJ2_HUMAN]	17.28	7	2	2	2	3.43012	10.47	1	1	0	6.81	1	1	191	21.6785	7.76709
H0VI16	Uncharacterized protein OS=Cavia porcellus GN=NEDD8 PE=4 SV=1 - [H0VI16_CAVPO]	17.28	3	1	1	1	2.92027	17.28	1	1					81	9.05295	7.25439
B3KUZ8	Aspartate aminotransferase OS=Homo sapiens PE=2 SV=1 - [B3KUZ8_HUMAN]	17.25	10	4	4	4	2.86168	3.23	1	1	9.19562	14.02	3	3	371	41.3001	8.83643
Q3B7I9	eIF2S2 protein (Fragment) OS=Homo sapiens GN=EIF2S2 PE=2 SV=1 - [Q3B7I9_HUMAN]	17.24	9	1	1	1					2.94655	17.24	1	1	87	10.223	5.14795
G1PHA5	Uncharacterized protein OS=Myotis lucifugus GN=PDZD11 PE=4 SV=1 - [G1PHA5_MYOLU]	17.14	4	1	1	1					5.494	17.14	1	1	140	16.1453	7.13721
P78527	DNA-dependent protein kinase catalytic subunit OS=Homo sapiens GN=PRKDC PE=1 SV=3 - [PRKDC_HUMAN]	17.13	12	52	52	100	29.206	4.34	12	13	256.67	16.86	51	87	4128	468.788	7.12256
A0A0G2JIJ7	TCF19 OS=Homo sapiens GN=TCF19 PE=1 SV=1 - [A0A0G2JIJ7_HUMAN]	17.1	9	4	4	5					17.453	17.1	4	5	345	37.1177	8.32373
Q9Y2W1	Thyroid hormone receptor-associated protein 3 OS=Homo sapiens GN=THRAP3 PE=1 SV=2 - [TR150_HUMAN]	17.07	11	14	15	158	225.997	15.6	14	67	302.671	12.57	11	91	955	108.601	10.1548
I7GA56	Macaca fascicularis brain cDNA clone: QorA-14289, similar to human proteasome (prosome, macropain) 26S subunit, non-ATPase,11 (PSMD11), mRNA, RefSeq: NM_002815.2 OS=Macaca fascicularis PE=2 SV=1 - [I7GA56_MACFA]	17.06	10	4	4	4		0			12.417	17.06	4	4	293	32.611	6.56592
H2QIN2	MKI67 (FHA domain) interacting nucleolar phosphoprotein OS=Pan troglodytes GN=NIFK PE=2 SV=1 - [H2QIN2_PANTR]	17.06	7	5	5	9	0	7.85	1	2	22.2997	17.06	5	7	293	34.2532	9.979
Q0QF37	Malate dehydrogenase (Fragment) OS=Homo sapiens GN=MDH2 PE=2 SV=1 - [Q0QF37_HUMAN]	17.05	23	3	3	6	4.79517	7.21	1	1	21.9788	17.05	3	5	305	31.9488	7.88428
Q15050	Ribosome biogenesis regulatory protein homolog OS=Homo sapiens GN=RRS1 PE=1 SV=2 - [RRS1_HUMAN]	16.99	4	5	5	10	8.83339	7.95	2	3	21.5676	16.99	5	7	365	41.1682	10.6968
P62861	40S ribosomal protein S30 OS=Homo sapiens GN=FAU PE=1 SV=1 - [RS30_HUMAN]	16.95	13	1	1	2		0			5.36311	16.95	1	2	59	6.64382	12.147
M0QZC5	40S ribosomal protein S11 OS=Homo sapiens GN=RPS11 PE=1 SV=1 - [M0QZC5_HUMAN]	16.95	9	2	2	4		0			2.66515	16.95	2	4	118	13.9885	10.3159
G1P830	Uncharacterized protein OS=Myotis lucifugus GN=KRT5 PE=3 SV=1 - [G1P830_MYOLU]	16.94	13	0	13	137	213.308	15.3	12	76	179.335	14.97	11	61	608	64.2497	7.85498
B1AK87	Capping protein (Actin filament) muscle Z-line, beta, isoform CRA_a OS=Homo sapiens GN=CAPZB PE=1 SV=1 - [B1AK87_HUMAN]	16.92	15	4	4	10	19.7987	16.92	4	6	13.4554	16.92	3	4	260	29.2768	6.91748
A0A0K0K1L1	Epididymis secretory protein Li 282 OS=Homo sapiens GN=HEL-S-282 PE=2 SV=1 - [A0A0K0K1L1_HUMAN]	16.92	9	3	3	3	2.37873	6.15	1	1	5.05777	10.77	2	2	260	29.1579	7.73779
P01966	Hemoglobin subunit alpha OS=Bos taurus GN=HBA PE=1 SV=2 - [HBA_BOVIN]	16.9	6	1	2	4	2.5991	6.34	1	1	8.87113	16.9	2	3	142	15.1749	8.44092
Q7Z759	CCT8 protein OS=Homo sapiens GN=CCT8 PE=2 SV=1 - [Q7Z759_HUMAN]	16.9	12	8	8	13	26.0867	12.88	6	8	13.3506	9.86	4	5	497	54.0717	5.31299
G1PE64	Uncharacterized protein OS=Myotis lucifugus GN=RCL1 PE=4 SV=1 - [G1PE64_MYOLU]	16.89	9	6	6	13	18.3691	10.46	3	7	12.8382	13.67	5	6	373	40.9587	9.27588
O75821	Eukaryotic translation initiation factor 3 subunit G OS=Homo sapiens GN=EIF3G PE=1 SV=2 - [EIF3G_HUMAN]	16.88	15	5	5	14	20.6437	16.88	4	7	19.7371	16.88	5	7	320	35.5889	6.12549
A0A0A8UFY8	Fructose-bisphosphate aldolase class I OS=Escherichia coli O26:H11 GN=fbaB PE=4 SV=1 - [A0A0A8UFY8_ECOLX]	16.86	11	4	4	7	10.9012	10	2	3	9.82573	16.86	4	4	350	38.0852	6.72705
A0A0D8J3G5	Methyltransferase OS=Ruthenibacterium lactatiformans GN=TQ39_01470 PE=3 SV=1 - [A0A0D8J3G5_9FIRM]	16.86	1	1	1	1					0	16.86	1	1	261	28.8646	8.92432
Q96GD7	CSDA protein OS=Homo sapiens PE=2 SV=1 - [Q96GD7_HUMAN]	16.83	1	3	3	6	7.69494	11.88	2	3	6.70164	10.56	2	3	303	31.912	9.65674
E0VFQ2	26S protease regulatory subunit S10B, putative OS=Pediculus humanus subsp. corporis GN=8236600 PE=3 SV=1 - [E0VFQ2_PEDHC]	16.71	5	1	4	8	3.3631	2.78	1	1	18.4243	16.71	4	7	395	44.7815	8.30908
Q1JIV2	Uncharacterized protein OS=Streptococcus pyogenes serotype M2 (strain MGAS10270) GN=MGAS10270_Spy0156 PE=4 SV=1 - [Q1JIV2_STRPD]	16.67	2	1	1	1	2.15075	16.67	1	1					48	5.68789	4.80518
B1AK13	3-hydroxymethyl-3-methylglutaryl-Coenzyme A lyase (Hydroxymethylglutaricaciduria), isoform CRA_b OS=Homo sapiens GN=HMGCL PE=2 SV=1 - [B1AK13_HUMAN]	16.67	4	3	3	5	9.72766	16.67	3	4	4.2952	4.67	1	1	300	31.7143	7.60596
K9IVQ9	Putative dna replication helicase (Fragment) OS=Desmodus rotundus PE=2 SV=1 - [K9IVQ9_DESRO]	16.63	35	12	12	19	34.0046	11.41	9	10	27.1848	10.74	7	9	1052	116.561	7.44482
A8E578	Rab14 protein OS=Danio rerio GN=rab14 PE=2 SV=1 - [A8E578_DANRE]	16.56	353	1	2	2	2.44875	9.55	1	1	2.58158	7.01	1	1	157	17.3526	5.57959
B2R6F9	cDNA, FLJ92932, highly similar to Homo sapiens serine/threonine kinase 38 (STK38), mRNA OS=Homo sapiens PE=2 SV=1 - [B2R6F9_HUMAN]	16.56	14	6	6	7	20.2232	16.56	6	7					465	54.2044	7.15186
Q8N1N4	Keratin, type II cytoskeletal 78 OS=Homo sapiens GN=KRT78 PE=1 SV=2 - [K2C78_HUMAN]	16.54	4	8	8	16	24.561	11.92	6	9	21.604	13.85	6	7	520	56.8305	6.02393
A0A024R609	Pyruvate kinase OS=Homo sapiens GN=PKM2 PE=3 SV=1 - [A0A024R609_HUMAN]	16.52	38	3	3	4	7.12215	13.33	2	2	4.83069	3.19	1	2	345	37.5343	6.39209
Q9P1D9	PRO2242 OS=Homo sapiens PE=2 SV=1 - [Q9P1D9_HUMAN]	16.44	10	1	1	2	2.24261	16.44	1	1	2.38143	16.44	1	1	73	8.42997	5.33838
W6KG47	Uncharacterized protein OS=Phytomonas sp. isolate EM1 GN=GSEM1_T00000527001 PE=4 SV=1 - [W6KG47_9TRYP]	16.38	1	1	1	2	0	16.38	1	2					116	13.4801	10.3159
B4DNK3	cDNA FLJ52127, highly similar to Multisynthetase complex auxiliary component p43 OS=Homo sapiens PE=2 SV=1 - [B4DNK3_HUMAN]	16.36	9	3	3	4	6.52111	11.9	2	2	5.93784	10.78	2	2	269	29.7268	9.0708
F8WBS5	60S ribosomal protein L35a OS=Homo sapiens GN=RPL35A PE=1 SV=1 - [F8WBS5_HUMAN]	16.36	10	1	1	1					1.95243	16.36	1	1	55	6.46844	9.99365
M0QZG7	U1 small nuclear ribonucleoprotein A (Fragment) OS=Homo sapiens GN=SNRPA PE=1 SV=1 - [M0QZG7_HUMAN]	16.3	5	1	1	1	3.7383	16.3	1	1		0			184	20.1232	9.87646
P14106	Complement C1q subcomponent subunit B OS=Mus musculus GN=C1qb PE=1 SV=2 - [C1QB_MOUSE]	16.21	9	3	3	8	11.6922	16.21	3	4	12.2083	16.21	3	4	253	26.7006	8.14795
E9PKU4	60S ribosomal protein L8 (Fragment) OS=Homo sapiens GN=RPL8 PE=1 SV=1 - [E9PKU4_HUMAN]	16.17	13	2	2	6	6.33637	16.17	2	4	7.05569	11.06	1	2	235	25.5779	11.0044
A0A1Q6BBD5	Bifunctional hydroxymethylpyrimidine kinase/phosphomethylpyrimidine kinase OS=Escherichia coli GN=AWP75_11010 PE=4 SV=1 - [A0A1Q6BBD5_ECOLX]	16.17	2	1	2	21	31.7364	16.17	2	8	51.2382	16.17	2	13	266	28.6206	5.78271
A0A0A8UA55	Bifunctional hydroxy-methylpyrimidine kinase and hydroxy-phosphomethylpyrimidine kinase OS=Escherichia coli O26:H11 GN=thiD PE=4 SV=1 - [A0A0A8UA55_ECOLX]	16.17	9	1	2	42	63.0557	16.17	2	16	107.879	16.17	2	26	266	28.6007	6.15088
B4DJK0	Serine/arginine-rich-splicing factor 5 OS=Homo sapiens GN=SRSF5 PE=1 SV=1 - [B4DJK0_HUMAN]	16.13	45	2	2	5	6.42743	16.13	2	3	4.55844	7.26	1	2	124	14.4283	10.0815
P12004	Proliferating cell nuclear antigen OS=Homo sapiens GN=PCNA PE=1 SV=1 - [PCNA_HUMAN]	16.09	9	2	2	4	6.6046	16.09	2	2	7.19842	16.09	2	2	261	28.7503	4.69092
A0A075B746	28S ribosomal protein S21, mitochondrial OS=Homo sapiens GN=MRPS21 PE=1 SV=1 - [A0A075B746_HUMAN]	16.09	2	1	1	1	1.60086	16.09	1	1					87	10.6814	9.92041
A0A1V2G7X9	ATP synthase subunit beta OS=Escherichia coli GN=atpD PE=3 SV=1 - [A0A1V2G7X9_ECOLX]	16.09	48	1	5	5	7.75382	6.67	2	2	9.01285	9.43	3	3	435	47.7054	5.021
I7GP06	Macaca fascicularis brain cDNA clone: QtrA-18843, similar to human general transcription factor IIF, polypeptide 2 (30kDsubunit) (GTF2F2), mRNA, RefSeq: NM_004128.1 OS=Macaca fascicularis PE=2 SV=1 - [I7GP06_MACFA]	16	7	1	1	1	3.1417	16	1	1					125	14.7787	8.96826
Q4R3K9	Testis cDNA clone: QtsA-16241, similar to human golgi phosphoprotein 3 (coat-protein) (GOLPH3) OS=Macaca fascicularis PE=2 SV=1 - [Q4R3K9_MACFA]	16	7	1	1	1					0	16	1	1	100	11.5281	6.78564
Q4R5U4	Testis cDNA, clone: QtsA-20748, similar to human ribonuclease P/MRP 30kDa subunit (RPP30) OS=Macaca fascicularis PE=2 SV=1 - [Q4R5U4_MACFA]	16	7	1	1	1					2.18385	16	1	1	125	13.466	8.71924
H2QA12	Mitochondrial ribosomal protein S11 OS=Pan troglodytes GN=MRPS11 PE=2 SV=1 - [H2QA12_PANTR]	15.98	6	2	2	2					4.98179	15.98	2	2	194	20.6609	10.6528
G7YYJ7	Acetylornithine deacetylase (Fragment) OS=Clonorchis sinensis GN=CLF_113461 PE=4 SV=1 - [G7YYJ7_CLOSI]	15.97	10	3	3	13	22.3159	13.69	2	7	17.5053	15.97	3	6	263	29.0958	6.12549
W1MUB7	ATP synthase subunit beta OS=Pseudomonas aeruginosa VRFPA03 GN=atpD PE=3 SV=1 - [W1MUB7_PSEAI]	15.94	46	1	5	5	10.5462	10.48	3	3	4.46969	5.46	2	2	458	49.4686	5.10986
Q86SX6	Glutaredoxin-related protein 5, mitochondrial OS=Homo sapiens GN=GLRX5 PE=1 SV=2 - [GLRX5_HUMAN]	15.92	1	2	2	5	9.13853	15.92	2	3	3.68818	15.92	2	2	157	16.6175	6.78564
B4DP61	Survival motor neuron protein OS=Homo sapiens GN=SMN2 PE=1 SV=1 - [B4DP61_HUMAN]	15.86	24	2	2	2	3.18758	7.93	1	1	2.72465	7.93	1	1	227	24.365	8.6167
B4DF70	cDNA FLJ60461, highly similar to Peroxiredoxin-2 (EC 1.11.1.15) OS=Homo sapiens PE=2 SV=1 - [B4DF70_HUMAN]	15.85	11	2	3	6	12.7119	15.85	3	5	3.80435	9.84	1	1	183	20.0946	8.77783
A0A086BTM2	RNA-binding protein Hfq OS=Pseudomonas aeruginosa VRFPA01 GN=hfq PE=3 SV=1 - [A0A086BTM2_PSEAI]	15.85	2	1	1	1					3.23797	15.85	1	1	82	9.09784	9.5249
A0A093EEI6	Chorismate mutase OS=Escherichia coli GN=pheA PE=4 SV=1 - [A0A093EEI6_ECOLX]	15.8	11	3	3	8	16.516	15.8	3	5	5.28425	5.7	1	3	386	43.0723	6.58057
Q3MHC5	Uncharacterized protein (Fragment) OS=Homo sapiens PE=2 SV=1 - [Q3MHC5_HUMAN]	15.79	8	1	1	1		0			1.81261	15.79	1	1	57	6.63782	11.6636
B4DYY5	cDNA FLJ55671, highly similar to Ubiquitin-associated protein 2-like OS=Homo sapiens PE=2 SV=1 - [B4DYY5_HUMAN]	15.77	20	9	9	22	38.8364	10.48	6	11	40.2248	13.54	8	11	1078	113.491	6.68311
Q96H44	GTPBP3 protein (Fragment) OS=Homo sapiens GN=GTPBP3 PE=2 SV=3 - [Q96H44_HUMAN]	15.76	4	3	3	5					17.8708	15.76	3	5	349	36.9833	5.66846
Q9NZT1	Calmodulin-like protein 5 OS=Homo sapiens GN=CALML5 PE=1 SV=2 - [CALL5_HUMAN]	15.75	1	1	1	1	2.46906	15.75	1	1					146	15.8828	4.43701
A4D1R6	Similar to 60S ribosomal protein L17 (L23) (Amino acid starvation-induced protein) (ASI) OS=Homo sapiens GN=LOC402695 PE=3 SV=1 - [A4D1R6_HUMAN]	15.69	27	1	1	4	7.38859	15.69	1	2	5.76377	15.69	1	2	102	11.8952	9.23193
A0A024R4P4	Zinc finger protein 444, isoform CRA_a OS=Homo sapiens GN=ZNF444 PE=4 SV=1 - [A0A024R4P4_HUMAN]	15.64	4	3	3	8	10.8999	15.03	2	4	14.5011	6.75	2	4	326	35.1107	8.55811
K7ELV2	Nucleoporin SEH1 (Fragment) OS=Homo sapiens GN=SEH1L PE=1 SV=1 - [K7ELV2_HUMAN]	15.59	10	3	3	8	10.6728	11.41	2	4	11.2273	7.98	2	4	263	29.5225	7.79639
E9PFW8	Sequestosome-1 (Fragment) OS=Homo sapiens GN=SQSTM1 PE=1 SV=1 - [E9PFW8_HUMAN]	15.57	6	1	1	2	6.2944	15.57	1	1	6.80725	15.57	1	1	167	18.3669	8.48486
H0VKX7	Uncharacterized protein OS=Cavia porcellus GN=QPCT PE=4 SV=1 - [H0VKX7_CAVPO]	15.53	6	1	2	4	6.15529	15.53	2	3	3.05823	4.35	1	1	322	37.0288	6.48096
Q05DL3	CSNK1A1 protein (Fragment) OS=Homo sapiens GN=CSNK1A1 PE=2 SV=1 - [Q05DL3_HUMAN]	15.52	35	3	3	6	7.82899	15.52	3	3	7.12446	15.52	3	3	232	26.685	9.74463
Q86W20	Protease serine 1 (Fragment) OS=Homo sapiens GN=PRSS1 PE=4 SV=1 - [Q86W20_HUMAN]	15.48	6	1	1	3	4.35778	15.48	1	2	3.0358	15.48	1	1	84	9.16094	10.272
B4DE78	cDNA FLJ52141, highly similar to 14-3-3 protein gamma OS=Homo sapiens PE=2 SV=1 - [B4DE78_HUMAN]	15.46	113	1	3	7	4.74664	8.7	2	2	12.7581	11.59	2	5	207	23.4876	4.81787
G1SUH8	Uncharacterized protein OS=Oryctolagus cuniculus GN=KRT2 PE=3 SV=1 - [G1SUH8_RABIT]	15.37	8	1	8	105	145.248	15.37	8	52	134.327	15.37	8	53	618	63.2473	8.80713
E7EU96	Casein kinase II subunit alpha OS=Homo sapiens GN=CSNK2A1 PE=1 SV=1 - [E7EU96_HUMAN]	15.32	16	3	3	4	8.7788	10.13	2	2	5.13928	10.65	2	2	385	45.2819	7.94287
Q3ZCQ8	Mitochondrial import inner membrane translocase subunit TIM50 OS=Homo sapiens GN=TIMM50 PE=1 SV=2 - [TIM50_HUMAN]	15.3	12	4	4	10	13.2045	12.46	3	4	21.6908	12.18	3	6	353	39.6215	8.36768
D6RAW0	Ubiquitin-conjugating enzyme E2 D3 (Fragment) OS=Homo sapiens GN=UBE2D3 PE=3 SV=1 - [D6RAW0_HUMAN]	15.28	23	1	1	2	2.55424	15.28	1	1	2.53094	15.28	1	1	72	8.20811	8.88037
G1SEJ8	Uncharacterized protein OS=Oryctolagus cuniculus GN=GNAI1 PE=4 SV=1 - [G1SEJ8_RABIT]	15.25	102	1	4	12	8.36696	7.34	2	4	21.6113	11.02	3	8	354	40.3212	5.97314
Q6DRA6	Putative histone H2B type 2-D OS=Homo sapiens GN=HIST2H2BD PE=5 SV=3 - [H2B2D_HUMAN]	15.24	2	1	3	25	11.5901	14.63	2	5	58.1853	15.24	3	20	164	18.0065	10.5796
G1U9I8	Uncharacterized protein OS=Oryctolagus cuniculus GN=KRT1 PE=3 SV=2 - [G1U9I8_RABIT]	15.22	48	0	11	223	278.919	13.58	10	104	316.058	15.22	11	119	611	64.1944	8.47021
H2Q7G5	Mitochondrial ribosomal protein S31 OS=Pan troglodytes GN=MRPS31 PE=2 SV=1 - [H2Q7G5_PANTR]	15.19	2	3	3	5	11.0117	15.19	3	4	1.83568	3.8	1	1	395	45.2014	9.23193
A0A024R1X8	Junction plakoglobin, isoform CRA_a OS=Homo sapiens GN=JUP PE=4 SV=1 - [A0A024R1X8_HUMAN]	15.17	15	8	8	13	22.8354	12.48	7	7	18.073	6.71	3	6	745	81.6748	6.13818
W0AVH6	50S ribosomal protein L28 OS=Escherichia albertii KF1 GN=rpmB PE=4 SV=1 - [W0AVH6_9ESCH]	15.15	2	1	1	1	3.02632	15.15	1	1					66	7.69015	11.2534
Q96P63	Serpin B12 OS=Homo sapiens GN=SERPINB12 PE=1 SV=1 - [SPB12_HUMAN]	15.06	3	5	5	11	15.7673	15.06	5	7	9.28636	8.4	3	4	405	46.2471	5.52881
A0A0H2WVA6	Transcription termination factor Rho OS=Salmonella paratyphi A (strain ATCC 9150 / SARB42) GN=rho PE=3 SV=1 - [A0A0H2WVA6_SALPA]	15.04	10	2	4	7	10.3566	15.04	4	4	7.21537	9.31	2	3	419	46.9636	7.25439
Q9NZB2	Constitutive coactivator of PPAR-gamma-like protein 1 OS=Homo sapiens GN=FAM120A PE=1 SV=2 - [F120A_HUMAN]	15.03	8	13	13	25	40.6474	10.2	9	13	37.8823	12.88	10	12	1118	121.811	8.88037
P17096	High mobility group protein HMG-I/HMG-Y OS=Homo sapiens GN=HMGA1 PE=1 SV=3 - [HMGA1_HUMAN]	14.95	5	2	2	4					13.1513	14.95	2	4	107	11.6691	10.3159
Q5JR95	40S ribosomal protein S8 OS=Homo sapiens GN=RPS8 PE=1 SV=1 - [Q5JR95_HUMAN]	14.89	14	2	2	3	2.49498	6.91	1	1	7.30687	14.89	2	2	188	21.866	10.3599
B7Z4G0	cDNA FLJ51993, highly similar to Ribosomal protein L7-like 1 OS=Homo sapiens PE=2 SV=1 - [B7Z4G0_HUMAN]	14.89	8	2	2	3	2.12332	7.09	1	1	5.0897	14.89	2	2	141	16.5766	10.9458
A0A0M5KS39	B2 18-5 anti-human butyrylcholinesterase (BChE) light chain variable region (Fragment) OS=Mus musculus PE=2 SV=1 - [A0A0M5KS39_MOUSE]	14.81	1	1	1	3	7.04182	14.81	1	2	3.41343	14.81	1	1	108	11.8598	5.36377
B4DZP5	cDNA FLJ51165, highly similar to DNA damage-binding protein 1 OS=Homo sapiens PE=2 SV=1 - [B4DZP5_HUMAN]	14.77	19	9	9	14	18.1885	9.69	5	5	30.898	11.62	7	9	826	91.9275	5.30029
H2QH00	Uncharacterized protein OS=Pan troglodytes PE=4 SV=1 - [H2QH00_PANTR]	14.77	8	2	2	2					3.96459	14.77	2	2	149	16.3319	6.80029
W1XQ89	Cell division protein ftsZ (Fragment) OS=human gut metagenome GN=Q604_UNBC13884G0001 PE=4 SV=1 - [W1XQ89_9ZZZZ]	14.77	8	1	1	1					2.43782	14.77	1	1	88	9.00486	7.25439
G7YYK4	Glutamate-ammonia-ligase adenylyltransferase (Fragment) OS=Clonorchis sinensis GN=CLF_113468 PE=4 SV=1 - [G7YYK4_CLOSI]	14.76	21	4	4	4					14.1765	14.76	4	4	393	44.7834	5.24951
Q5TEC6	Histone H3 OS=Homo sapiens GN=HIST2H3PS2 PE=1 SV=1 - [Q5TEC6_HUMAN]	14.71	10	1	2	7		0			20.6283	14.71	2	7	136	15.4206	11.2681
K9J106	Putative conserved plasma membrane protein (Fragment) OS=Desmodus rotundus PE=2 SV=1 - [K9J106_DESRO]	14.71	4	1	1	1					2.55468	14.71	1	1	68	7.80501	8.1333
H6C5B1	Putative uncharacterized protein OS=Exophiala dermatitidis (strain ATCC 34100 / CBS 525.76 / NIH/UT8656) GN=HMPREF1120_06960 PE=4 SV=1 - [H6C5B1_EXODN]	14.7	1	1	1	1					0	14.7	1	1	279	30.9199	7.56201
G1P4P2	Uncharacterized protein OS=Myotis lucifugus GN=KRT1 PE=3 SV=1 - [G1P4P2_MYOLU]	14.68	1	0	11	177	275.181	14.68	11	99	231.664	11.91	9	78	613	63.3928	8.07471
S6B2A1	IgG L chain OS=Homo sapiens PE=2 SV=1 - [S6B2A1_HUMAN]	14.67	23	1	2	8	9.92661	14.67	2	4	10.8055	14.67	2	4	184	20.3602	5.51611
G1T6X1	Uncharacterized protein OS=Oryctolagus cuniculus GN=KRT31 PE=3 SV=1 - [G1T6X1_RABIT]	14.66	43	0	5	13	28.9608	12.02	4	12	1.87992	2.64	1	1	416	47.1519	4.85596
P12725	Alpha-1-antiproteinase OS=Ovis aries PE=1 SV=1 - [A1AT_SHEEP]	14.66	1	5	5	31	12.8186	9.38	3	4	77.9203	14.66	5	27	416	45.9557	6.26514
H3BLU7	Aflatoxin B1 aldehyde reductase member 2 (Fragment) OS=Homo sapiens GN=AKR7A2 PE=1 SV=1 - [H3BLU7_HUMAN]	14.65	8	3	3	7	15.3879	14.65	3	4	11.7518	10.83	2	3	314	34.6622	7.18115
H2Q6P4	Uncharacterized protein OS=Pan troglodytes GN=SCYL2 PE=4 SV=1 - [H2Q6P4_PANTR]	14.64	14	9	9	11	32.9143	14.64	9	11		0			929	103.61	8.30908
B4E138	cDNA FLJ50940, highly similar to PHD finger protein 6 OS=Homo sapiens PE=2 SV=1 - [B4E138_HUMAN]	14.63	3	1	1	1		0			3.22464	14.63	1	1	123	14.0378	7.6792
G1TIT3	Uncharacterized protein OS=Oryctolagus cuniculus GN=C1orf35 PE=4 SV=2 - [G1TIT3_RABIT]	14.62	7	4	4	5	8.37479	10.77	3	3	5.20417	7.69	2	2	260	29.0249	10.1108
Q4V8Q5	Serine/arginine-rich-splicing factor 7b OS=Danio rerio GN=srsf7b PE=1 SV=1 - [Q4V8Q5_DANRE]	14.61	4	1	2	4	6.26294	9.55	1	2	6.00926	14.61	2	2	178	20.4423	9.83252
H0YJH9	Polyadenylate-binding protein 2 (Fragment) OS=Homo sapiens GN=PABPN1 PE=1 SV=1 - [H0YJH9_HUMAN]	14.58	15	1	1	1	2.93528	14.58	1	1		0			96	11.0747	11.2681
H3JXB1	Isocitrate dehydrogenase (Fragment) OS=Escherichia albertii GN=icd PE=4 SV=1 - [H3JXB1_9ESCH]	14.53	30	2	2	3	6.23141	14.53	2	2	3.26419	6.98	1	1	172	19.4811	6.07471
Q5JXM0	Putative uncharacterized protein DKFZp564C0482 OS=Homo sapiens GN=DKFZp564C0482 PE=4 SV=1 - [Q5JXM0_HUMAN]	14.52	6	2	2	2	1.66829	14.52	2	2					248	27.0939	5.52881
H2PYH2	Regulator of chromosome condensation 1 OS=Pan troglodytes GN=RCC1 PE=2 SV=1 - [H2PYH2_PANTR]	14.49	16	4	4	10	3.44513	4.51	1	2	25.209	14.49	4	8	421	44.9106	7.51807
Q9NXS2	Glutaminyl-peptide cyclotransferase-like protein OS=Homo sapiens GN=QPCTL PE=1 SV=2 - [QPCTL_HUMAN]	14.4	4	4	4	7	10.4936	14.4	4	4	8.62822	3.66	2	3	382	42.8971	9.81787
B4DH12	cDNA FLJ60514, highly similar to Fructosamine-3-kinase (EC 2.7.1.-) OS=Homo sapiens PE=2 SV=1 - [B4DH12_HUMAN]	14.36	6	2	2	4	2.21886	5.94	1	1	7.77803	14.36	2	3	202	22.3145	8.70459
Q08EK5	Keratin 77 OS=Mus musculus GN=Krt77 PE=1 SV=1 - [Q08EK5_MOUSE]	14.34	8	1	5	47	70.0801	12.59	4	24	60.7838	12.24	4	23	572	61.3216	8.01611
A1AH17	Nickel-responsive regulator OS=Escherichia coli O1:K1 / APEC GN=nikR PE=3 SV=1 - [NIKR_ECOK1]	14.29	2	1	1	1	2.69977	14.29	1	1					133	15.0845	6.23975
H0Y723	DNA-directed RNA polymerases I and III subunit RPAC1 (Fragment) OS=Homo sapiens GN=POLR1C PE=1 SV=1 - [H0Y723_HUMAN]	14.29	11	2	2	2	2.05574	6.43	1	1	2.32048	7.86	1	1	140	16.053	5.14795
C9J4S4	Ras-related protein Rab-7a OS=Homo sapiens GN=RAB7A PE=1 SV=1 - [C9J4S4_HUMAN]	14.29	8	1	1	1	3.87815	14.29	1	1					98	10.9547	8.77783
B4DLR3	cDNA FLJ54020, highly similar to Heterogeneous nuclear ribonucleoprotein U OS=Homo sapiens PE=2 SV=1 - [B4DLR3_HUMAN]	14.29	27	7	7	44	86.7024	13.9	6	25	63.9155	14.29	7	19	784	86.8064	6.43018
G1QF48	Uncharacterized protein OS=Myotis lucifugus GN=NXT1 PE=4 SV=1 - [G1QF48_MYOLU]	14.29	3	1	1	1	0	14.29	1	1					140	15.8777	5.03369
D3VVE7	Ataxin 3 variant r OS=Homo sapiens GN=ATXN3 PE=2 SV=1 - [D3VVE7_HUMAN]	14.29	170	1	1	1	3.77396	14.29	1	1					91	10.6674	5.12256
A0A0X9V9B3	MS-F1 light chain variable region (Fragment) OS=Homo sapiens PE=2 SV=1 - [A0A0X9V9B3_HUMAN]	14.29	1	1	1	5	8.49577	14.29	1	3	6.47148	14.29	1	2	112	12.1	5.96045
Q9H2R7	NPD011 OS=Homo sapiens GN=NPD011 PE=2 SV=1 - [Q9H2R7_HUMAN]	14.22	10	2	2	2					6.36215	14.22	2	2	211	24.3385	5.96045
P03246	E1B protein, small T-antigen OS=Human adenovirus C serotype 5 PE=1 SV=1 - [E1BS_ADE05]	14.2	3	1	1	1	5.70402	14.2	1	1					176	20.6015	6.55127
I7G2Y3	Macaca fascicularis brain cDNA clone: QmoA-12514, similar to human non-POU domain containing, octamer-binding (NONO), mRNA, RefSeq: NM_007363.3 OS=Macaca fascicularis PE=2 SV=1 - [I7G2Y3_MACFA]	14.2	9	1	1	4	5.7381	14.2	1	2	5.89573	14.2	1	2	162	18.4783	6.34131
Q7Z612	Acidic ribosomal phosphoprotein P1 OS=Homo sapiens PE=2 SV=1 - [Q7Z612_HUMAN]	14.16	7	1	1	7	10.0788	14.16	1	3	14.0388	14.16	1	4	113	11.3917	4.36084
A0N7G5	H2 (Fragment) OS=Mus sp. GN=Ig VH PE=2 SV=1 - [A0N7G5_9MURI]	14.16	1	1	1	2					4.39239	14.16	1	2	113	12.4451	8.85107
E9PN04	Zinc finger protein ubi-d4 OS=Homo sapiens GN=DPF2 PE=1 SV=1 - [E9PN04_HUMAN]	14.15	8	1	1	1					3.78706	14.15	1	1	106	12.3102	9.86182
E9PJ81	UBX domain-containing protein 1 (Fragment) OS=Homo sapiens GN=UBXN1 PE=1 SV=1 - [E9PJ81_HUMAN]	14.14	12	2	2	3	2.67968	14.14	2	2	3.04492	4.14	1	1	290	32.5916	5.13525
A0A0G2R294	E1B large T antigen OS=Human mastadenovirus C GN=E1B PE=4 SV=1 - [A0A0G2R294_9ADEN]	14.11	16	5	5	15	10.0549	7.06	3	4	33.5132	14.11	5	11	496	54.9169	7.44482
A0A024R201	Proteasome (Prosome, macropain) 26S subunit, non-ATPase, 13, isoform CRA_a OS=Homo sapiens GN=PSMD13 PE=4 SV=1 - [A0A024R201_HUMAN]	14.1	23	4	4	5	2.16871	2.39	1	1	7.23782	11.7	3	4	376	42.8911	5.80811
Q14966	Zinc finger protein 638 OS=Homo sapiens GN=ZNF638 PE=1 SV=2 - [ZN638_HUMAN]	14.05	17	20	20	34	57.4647	11.93	17	21	32.962	8.39	11	13	1978	220.488	6.37939
A0A0G4CRQ0	60kDa chaperonin (Fragment) OS=Escherichia albertii GN=cpn60 PE=4 SV=1 - [A0A0G4CRQ0_9ESCH]	14.05	22	1	1	1					0	14.05	1	1	185	19.3363	4.66553
B1AQ77	Keratin 15, isoform CRA_a OS=Mus musculus GN=Krt15 PE=1 SV=1 - [B1AQ77_MOUSE]	14.04	50	1	7	29	39.0478	9.87	6	19	24.7761	10.09	4	10	456	49.4633	4.85596
A0A125MH78	Uncharacterized protein OS=Bacteroides cellulosilyticus GN=AA416_00541 PE=3 SV=1 - [A0A125MH78_9BACE]	14.04	2	1	1	1					0	14.04	1	1	228	25.6603	6.69775
Q53T70	Putative uncharacterized protein RAB10 (Fragment) OS=Homo sapiens GN=RAB10 PE=4 SV=1 - [Q53T70_HUMAN]	14.01	353	1	2	2	2.60793	7.01	1	1	2.58158	7.01	1	1	157	17.7991	8.25049
Q5ZEZ4	Alpha-actinin 1 (Fragment) OS=Homo sapiens GN=ACTN1 PE=2 SV=1 - [Q5ZEZ4_HUMAN]	13.95	34	1	1	1	3.06539	13.95	1	1					86	10.1891	5.69385
A0A086C294	50S ribosomal protein L14 OS=Pseudomonas aeruginosa VRFPA01 GN=rplN PE=3 SV=1 - [A0A086C294_PSEAI]	13.93	1	1	1	1	1.9424	13.93	1	1		0			122	13.4034	10.7554
K9IRZ5	S-adenosylmethionine synthase (Fragment) OS=Desmodus rotundus PE=2 SV=1 - [K9IRZ5_DESRO]	13.93	41	5	5	8	12.3271	13.93	4	5	7.04388	10.66	3	3	366	40.5879	7.07861
H7C306	Remodeling and spacing factor 1 (Fragment) OS=Homo sapiens GN=RSF1 PE=1 SV=1 - [H7C306_HUMAN]	13.86	11	2	2	2					6.04919	13.86	2	2	202	22.9073	4.70361
P53004	Biliverdin reductase A OS=Homo sapiens GN=BLVRA PE=1 SV=2 - [BIEA_HUMAN]	13.85	6	3	3	4	8.74689	13.85	3	3	2.6718	3.38	1	1	296	33.4073	6.44287
Q5K634	SCCA2/SCCA1 fusion protein isoform 1 OS=Homo sapiens PE=2 SV=1 - [Q5K634_HUMAN]	13.85	2	3	4	6	13.2971	13.85	4	5	2.28071	2.56	1	1	390	44.6205	6.39209
E9PBS1	Multifunctional protein ADE2 (Fragment) OS=Homo sapiens GN=PAICS PE=1 SV=1 - [E9PBS1_HUMAN]	13.8	13	4	4	7	2.98502	3.39	1	1	21.1086	13.8	4	6	413	45.6224	6.68311
E9PRR7	Protein FRG1 (Fragment) OS=Homo sapiens GN=FRG1 PE=1 SV=1 - [E9PRR7_HUMAN]	13.79	7	1	1	2	1.88379	13.79	1	1	1.62763	13.79	1	1	116	12.5082	5.24951
W2TLT6	Uncharacterized protein (Fragment) OS=Necator americanus GN=NECAME_07834 PE=4 SV=1 - [W2TLT6_NECAM]	13.74	1	1	1	2					0	13.74	1	2	211	24.8033	8.67529
I7GNF0	Macaca fascicularis brain cDNA clone: QtrA-15302, similar to human U5 snRNP-specific 40 kDa protein (hPrp8-binding)(HPRP8BP), mRNA, RefSeq: NM_004814.1 OS=Macaca fascicularis PE=2 SV=1 - [I7GNF0_MACFA]	13.73	10	4	4	6	11.905	13.73	4	5	3.10712	3.36	1	1	357	39.3177	8.104
D6RCB3	Eukaryotic peptide chain release factor subunit 1 OS=Homo sapiens GN=ETF1 PE=1 SV=1 - [D6RCB3_HUMAN]	13.68	10	1	1	1	2.12567	13.68	1	1					95	10.4757	10.228
F8WEG8	Interferon-inducible double-stranded RNA-dependent protein kinase activator A OS=Homo sapiens GN=PRKRA PE=1 SV=1 - [F8WEG8_HUMAN]	13.68	6	1	1	1	2.91783	13.68	1	1					95	10.4073	9.01221
Q505N9	Igh protein OS=Mus musculus GN=Igh PE=1 SV=1 - [Q505N9_MOUSE]	13.68	1	6	6	20	30.0757	13.03	5	9	29.6354	10.04	5	11	468	51.6387	6.771
A0A0C4DGS1	Dolichyl-diphosphooligosaccharide--protein glycosyltransferase 48 kDa subunit OS=Homo sapiens GN=DDOST PE=1 SV=1 - [A0A0C4DGS1_HUMAN]	13.67	12	4	4	7	8.80419	7.06	3	3	12.4513	13.67	4	4	439	48.769	5.69385
I7GL66	Macaca fascicularis brain cDNA clone: QorA-11466, similar to human proteasome (prosome, macropain) 26S subunit, ATPase, 1(PSMC1), mRNA, RefSeq: NM_002802.2 OS=Macaca fascicularis PE=2 SV=1 - [I7GL66_MACFA]	13.66	176	1	2	2	3.73284	8.37	1	1	3.12333	5.29	1	1	227	25.3304	8.04541
X1WH05	Synaptotagmin-binding, cytoplasmic RNA-interacting protein,-like (Fragment) OS=Danio rerio GN=syncripl PE=1 SV=1 - [X1WH05_DANRE]	13.59	31	2	2	2	2.46298	7.07	1	1	2.80133	6.52	1	1	184	20.3646	8.74854
A0A125U0U7	MS-C1 heavy chain variable region (Fragment) OS=Homo sapiens PE=2 SV=1 - [A0A125U0U7_HUMAN]	13.56	3	1	1	3	4.11099	13.56	1	1	6.72901	13.56	1	2	118	13.0884	6.07471
B3KME8	cDNA FLJ10827 fis, clone NT2RP4001117, highly similar to Protein transport protein Sec61 subunit alpha isoform 1 OS=Homo sapiens PE=2 SV=1 - [B3KME8_HUMAN]	13.53	7	1	1	1					2.65102	13.53	1	1	170	18.1642	5.79541
H2QK75	Uncharacterized protein OS=Pan troglodytes GN=CHMP4B PE=3 SV=1 - [H2QK75_PANTR]	13.51	10	2	2	3	7.79607	13.51	2	2	4.20182	7.21	1	1	222	24.7004	4.81787
C9JJ34	Ran-specific GTPase-activating protein (Fragment) OS=Homo sapiens GN=RANBP1 PE=1 SV=1 - [C9JJ34_HUMAN]	13.5	18	2	2	3	2.15887	6.75	1	1	5.55189	13.5	2	2	163	18.7502	5.21143
H2Q1A0	Uncharacterized protein OS=Pan troglodytes GN=IBA57 PE=4 SV=1 - [H2Q1A0_PANTR]	13.48	2	3	3	6	8.50128	13.48	2	3	3.48889	12.92	2	3	356	38.106	9.61279
P05545	Serine protease inhibitor A3K OS=Rattus norvegicus GN=Serpina3k PE=1 SV=3 - [SPA3K_RAT]	13.46	1	2	2	2	6.50403	13.46	2	2		0			416	46.5321	5.43994
W2TUZ4	Histone H4 OS=Necator americanus GN=NECAME_16752 PE=3 SV=1 - [W2TUZ4_NECAM]	13.46	1	1	1	1	2.24422	13.46	1	1		0			104	11.6124	11.0044
A0A0G2JDE1	Immunoglobulin heavy variable V8-12 (Fragment) OS=Mus musculus GN=Ighv8-12 PE=4 SV=1 - [A0A0G2JDE1_MOUSE]	13.45	1	1	1	3	6.47671	13.45	1	2	2.41732	13.45	1	1	119	13.2548	9.17334
F8WEA6	Mitochondrial-processing peptidase subunit beta OS=Homo sapiens GN=PMPCB PE=1 SV=1 - [F8WEA6_HUMAN]	13.45	13	1	1	1					3.3836	13.45	1	1	119	12.8636	9.49561
I7GHC9	Macaca fascicularis brain cDNA clone: QmoA-12491, similar to human heterogeneous nuclear ribonucleoprotein D-like (HNRPDL),transcript variant 2, mRNA, RefSeq: NM_031372.1 OS=Macaca fascicularis PE=2 SV=1 - [I7GHC9_MACFA]	13.42	18	1	3	5	2.81181	4.33	1	1	10.2318	13.42	3	4	231	26.2242	7.73779
E7ERH2	S-phase kinase-associated protein 1 (Fragment) OS=Homo sapiens GN=SKP1 PE=1 SV=1 - [E7ERH2_HUMAN]	13.38	13	1	1	1					0	13.38	1	1	142	16.0241	4.64014
Q6TGS5	Tubulin alpha chain OS=Danio rerio GN=tuba4l PE=1 SV=1 - [Q6TGS5_DANRE]	13.36	19	1	3	8	3.33954	4.68	1	1	20.5412	13.36	3	7	449	50.1824	5.09717
H2QTR0	Arginase OS=Pan troglodytes GN=ARG1 PE=3 SV=1 - [H2QTR0_PANTR]	13.35	3	3	3	4	10.5233	13.35	3	4		0			322	34.7713	6.7417
Q9H2J8	DC36 OS=Homo sapiens PE=2 SV=1 - [Q9H2J8_HUMAN]	13.33	33	1	1	1					3.47257	13.33	1	1	105	11.4458	4.77979
A0A1B8VG01	Ketol-acid reductoisomerase (NADP(+)) OS=Pseudomonas sp. AU11447 GN=ilvC PE=3 SV=1 - [A0A1B8VG01_9PSED]	13.31	4	3	3	5	5.46029	10.06	2	3	5.75514	8.88	2	2	338	36.3832	5.68115
Q9H7N7	FLJ00031 protein (Fragment) OS=Homo sapiens GN=FLJ00031 PE=2 SV=1 - [Q9H7N7_HUMAN]	13.3	6	1	1	2	3.6841	13.3	1	1	4.16388	13.3	1	1	188	21.2116	8.45557
A0A0A0MRF4	39S ribosomal protein L19, mitochondrial OS=Homo sapiens GN=MRPL19 PE=1 SV=1 - [A0A0A0MRF4_HUMAN]	13.29	9	2	2	3	5.06899	13.29	2	2	3.12848	8.09	1	1	173	19.1192	10.4331
B2R894	Mitochondrial ribosomal protein L38, isoform CRA_b OS=Homo sapiens GN=MRPL38 PE=1 SV=1 - [B2R894_HUMAN]	13.29	8	5	5	8	14.9603	13.29	5	6	5.54081	5.78	2	2	346	40.7314	6.66846
H2PXT8	Uncharacterized protein OS=Pan troglodytes PE=4 SV=1 - [H2PXT8_PANTR]	13.25	6	1	1	1					2.51637	13.25	1	1	83	9.24098	9.48096
F8W2R0	Ribosomal protein S10 (Fragment) OS=Danio rerio GN=rps10 PE=1 SV=1 - [F8W2R0_DANRE]	13.24	13	1	1	3	2.76864	13.24	1	1	5.12068	13.24	1	2	68	7.99621	9.65674
I7GNX4	Macaca fascicularis brain cDNA clone: QtrA-18347, similar to human protein kinase, AMP-activated, gamma 1 non-catalyticsubunit (PRKAG1), mRNA, RefSeq: NM_002733.2 OS=Macaca fascicularis PE=2 SV=1 - [I7GNX4_MACFA]	13.21	11	2	2	4		0			5.67496	13.21	2	4	280	31.8852	8.57275
A0A086C2A9	DNA-directed RNA polymerase subunit alpha OS=Pseudomonas aeruginosa VRFPA01 GN=rpoA PE=3 SV=1 - [A0A086C2A9_PSEAI]	13.21	15	4	4	6	9.17973	9.91	3	3	9.49574	10.81	3	3	333	36.6273	5.0083
E9PLD3	Uncharacterized protein OS=Homo sapiens PE=4 SV=1 - [E9PLD3_HUMAN]	13.13	6	1	1	1	3.86393	13.13	1	1					99	11.5928	12.2349
C9JG87	39S ribosomal protein L39, mitochondrial (Fragment) OS=Homo sapiens GN=MRPL39 PE=1 SV=1 - [C9JG87_HUMAN]	13.13	5	4	4	7	6.33243	8.75	2	2	14.1957	13.13	4	5	297	34.0104	8.14795
O95248	Myotubularin-related protein 5 OS=Homo sapiens GN=SBF1 PE=1 SV=3 - [MTMR5_HUMAN]	13.12	24	15	15	32	66.54	11.57	13	20	32.6258	8.14	10	12	1867	208.184	6.90283
B3KM80	Nucleolin, isoform CRA_c OS=Homo sapiens GN=NCL PE=2 SV=1 - [B3KM80_HUMAN]	13.06	10	4	4	6	17.0574	13.06	4	5	2.96104	3.36	1	1	536	58.5193	4.66553
H7C5J3	Ubiquitin carboxyl-terminal hydrolase 13 (Fragment) OS=Homo sapiens GN=USP13 PE=1 SV=1 - [H7C5J3_HUMAN]	13.04	10	2	4	8	10.2939	7.36	3	4	6.72655	12.71	3	4	299	34.2073	5.47803
G1Q0T7	Uncharacterized protein OS=Myotis lucifugus PE=3 SV=1 - [G1Q0T7_MYOLU]	13.04	1	1	1	1	1.72305	13.04	1	1					138	14.5945	8.51416
W1YTS6	Translation elongation factor Tu (Fragment) OS=human gut metagenome GN=Q604_UNBC00076G0001 PE=4 SV=1 - [W1YTS6_9ZZZZ]	13.04	1	1	1	1	2.48249	13.04	1	1					69	7.53671	4.34814
P82673	28S ribosomal protein S35, mitochondrial OS=Homo sapiens GN=MRPS35 PE=1 SV=1 - [RT35_HUMAN]	13	7	3	3	3	7.43436	13	3	3					323	36.8211	8.23584
Q9P035	Very-long-chain (3R)-3-hydroxyacyl-CoA dehydratase 3 OS=Homo sapiens GN=HACD3 PE=1 SV=2 - [HACD3_HUMAN]	12.98	10	4	4	7	8.1672	9.67	2	3	10.0268	7.18	3	4	362	43.1316	8.93896
Q5S4N1	Putative uncharacterized protein (Fragment) OS=Homo sapiens PE=2 SV=1 - [Q5S4N1_HUMAN]	12.98	26	2	4	12	16.9814	12.98	4	6	16.328	9.67	3	6	362	40.1621	7.88428
G1SKQ8	KRR1 small subunit processome component OS=Oryctolagus cuniculus GN=KRR1 PE=3 SV=1 - [G1SKQ8_RABIT]	12.89	10	3	3	4					11.5872	12.89	3	4	380	43.2895	9.81787
D2QB59	ATP-binding protein of ABC transporter system OS=Bifidobacterium dentium (strain ATCC 27534 / DSM 20436 / JCM 1195 / Bd1) GN=BDP_1438 PE=4 SV=1 - [D2QB59_BIFDB]	12.88	1	1	1	1		0			0	12.88	1	1	326	36.0016	5.5542
H7BXY3	Putative ATP-dependent RNA helicase DHX30 OS=Homo sapiens GN=DHX30 PE=1 SV=1 - [H7BXY3_HUMAN]	12.86	7	11	11	20	34.303	9.95	8	10	29.7636	6.35	6	10	1166	130.469	8.55811
G7YIU3	Large subunit ribosomal protein L23e OS=Clonorchis sinensis GN=CLF_109027 PE=3 SV=1 - [G7YIU3_CLOSI]	12.86	1	1	1	14	3.53636	12.86	1	5	8.60167	12.86	1	9	140	14.9711	10.3159
H0VAR5	Uncharacterized protein OS=Cavia porcellus GN=KRT1 PE=3 SV=1 - [H0VAR5_CAVPO]	12.83	34	1	8	146	157.046	11.05	7	66	201.236	12.83	8	80	561	59.6912	5.73193
Q4V914	Core histone macro-H2A OS=Danio rerio GN=h2afy2 PE=1 SV=1 - [Q4V914_DANRE]	12.81	4	1	3	14	9.15142	12.81	3	8	8.91101	12.81	3	6	367	39.8394	9.83252
B4DJV2	Citrate synthase OS=Homo sapiens GN=CS PE=1 SV=1 - [B4DJV2_HUMAN]	12.8	31	5	5	8	2.00742	2.21	1	1	19.9521	12.8	5	7	453	50.3997	7.89893
E7ERC8	Protein SEC13 homolog (Fragment) OS=Homo sapiens GN=SEC13 PE=1 SV=1 - [E7ERC8_HUMAN]	12.79	10	1	1	2	3.15167	12.79	1	1	3.38451	12.79	1	1	86	9.62462	6.50732
K9J4V9	Putative translation initiation factor 3 subunit g eif-3g (Fragment) OS=Desmodus rotundus PE=2 SV=1 - [K9J4V9_DESRO]	12.78	7	2	2	2	5.23819	12.78	2	2					180	20.6644	11.4438
G1U738	Uncharacterized protein OS=Oryctolagus cuniculus GN=LOC100355015 PE=4 SV=1 - [G1U738_RABIT]	12.75	8	2	2	3	2.6369	4.64	1	1	7.79201	12.75	2	2	345	38.8369	7.07861
Z4YIP7	OTU domain-containing protein 5-A (Fragment) OS=Danio rerio GN=otud5a PE=4 SV=1 - [Z4YIP7_DANRE]	12.72	12	2	2	2	3.99339	6.01	1	1	2.03019	6.71	1	1	283	31.4582	6.99072
H7C2P7	39S ribosomal protein L23, mitochondrial (Fragment) OS=Homo sapiens GN=MRPL23 PE=1 SV=1 - [H7C2P7_HUMAN]	12.71	7	1	1	2	2.65147	12.71	1	1	3.3514	12.71	1	1	118	13.7704	10.4185
A8K813	cDNA FLJ77763, highly similar to Homo sapiens prolactin regulatory element binding (PREB), mRNA OS=Homo sapiens PE=2 SV=1 - [A8K813_HUMAN]	12.71	13	3	3	4	2.22449	6.47	1	1	6.91569	6.24	2	3	417	45.4537	8.04541
M0R128	DnaJ homolog subfamily B member 1 (Fragment) OS=Homo sapiens GN=DNAJB1 PE=1 SV=8 - [M0R128_HUMAN]	12.66	15	1	1	1					1.72798	12.66	1	1	79	8.82406	4.88135
X6RFN3	E3 ubiquitin-protein ligase RING2 (Fragment) OS=Homo sapiens GN=RNF2 PE=1 SV=2 - [X6RFN3_HUMAN]	12.65	17	2	2	3	7.14649	12.65	2	2	2.81182	6.94	1	1	245	27.2603	6.34131
A0A024R9E2	Poly(A) binding protein, cytoplasmic 1, isoform CRA_c OS=Homo sapiens GN=PABPC1 PE=4 SV=1 - [A0A024R9E2_HUMAN]	12.65	50	4	4	9	18.3119	12.65	4	6	10.154	6.21	2	3	419	47.3048	8.92432
G1TVG7	Uncharacterized protein OS=Oryctolagus cuniculus PE=4 SV=2 - [G1TVG7_RABIT]	12.56	42	11	11	20	31.5385	9.02	8	9	32.5453	11.05	9	11	1131	126.363	7.82568
A0A087WXC6	Transducin beta-like protein 2 (Fragment) OS=Homo sapiens GN=TBL2 PE=1 SV=1 - [A0A087WXC6_HUMAN]	12.5	17	1	1	1					3.09514	12.5	1	1	96	11.1215	8.90967
G1TQR2	Uncharacterized protein OS=Oryctolagus cuniculus GN=EEF1B2 PE=3 SV=1 - [G1TQR2_RABIT]	12.44	12	2	2	3	4.63798	6.67	1	1	8.41313	12.44	2	2	225	24.7883	4.66553
E9PLL0	Multivesicular body subunit 12A (Fragment) OS=Homo sapiens GN=MVB12A PE=1 SV=1 - [E9PLL0_HUMAN]	12.4	7	1	1	2	1.91332	12.4	1	1	1.74394	12.4	1	1	121	12.9789	10.4038
H2QEE3	Uncharacterized protein OS=Pan troglodytes GN=DSG1 PE=4 SV=1 - [H2QEE3_PANTR]	12.4	4	8	8	23	37.9838	8.49	6	12	35.7988	11.07	7	11	1048	113.722	5.05908
G1Q1J2	Uncharacterized protein (Fragment) OS=Myotis lucifugus GN=SLC25A1 PE=3 SV=1 - [G1Q1J2_MYOLU]	12.4	12	3	3	4	2.14125	4.65	1	1	7.76139	12.4	3	3	258	28.623	10.0962
B4DMG1	cDNA FLJ57155, highly similar to High mobility group protein 20A OS=Homo sapiens PE=2 SV=1 - [B4DMG1_HUMAN]	12.39	10	2	2	2					6.27677	12.39	2	2	234	27.7341	6.91748
H2QWK6	Eukaryotic translation initiation factor 3 subunit E OS=Pan troglodytes GN=EIF3E PE=3 SV=1 - [H2QWK6_PANTR]	12.39	26	4	4	4					10.2048	12.39	4	4	444	52.1089	6.03662
A0F976	Pol protein (Fragment) OS=Human immunodeficiency virus 1 GN=pol PE=4 SV=1 - [A0F976_9HIV1]	12.38	18	1	1	2	5.56186	12.38	1	2		0			210	24.5727	8.79248
P39748	Flap endonuclease 1 OS=Homo sapiens GN=FEN1 PE=1 SV=1 - [FEN1_HUMAN]	12.37	8	3	3	5	2.15923	2.89	1	1	13.589	12.37	3	4	380	42.5661	8.6167
C9JEV0	Zinc-alpha-2-glycoprotein OS=Homo sapiens GN=AZGP1 PE=1 SV=1 - [C9JEV0_HUMAN]	12.33	3	2	2	3	7.65142	12.33	2	3					227	26.3372	5.73193
K7ERE3	Keratin, type I cytoskeletal 13 OS=Homo sapiens GN=KRT13 PE=1 SV=1 - [K7ERE3_HUMAN]	12.29	42	1	6	50	67.2305	12.29	6	28	65.3418	8.43	4	22	415	45.2322	4.80518
H2R7V8	DnaJ (Hsp40) homolog, subfamily B, member 11 OS=Pan troglodytes GN=DNAJB11 PE=2 SV=1 - [H2R7V8_PANTR]	12.29	8	3	3	5	1.98842	8.38	2	2	7.3361	12.29	3	3	358	40.5167	6.17627
I7GKT7	Macaca fascicularis brain cDNA clone: QmoA-11895, similar to human syndecan binding protein (syntenin) (SDCBP), mRNA, RefSeq: NM_005625.1 OS=Macaca fascicularis PE=2 SV=1 - [I7GKT7_MACFA]	12.23	8	1	1	3	5.81232	12.23	1	2	3.35336	12.23	1	1	188	20.5089	9.46631
A5K8W3	Actin OS=Plasmodium vivax (strain Salvador I) GN=PVX_101200 PE=3 SV=1 - [A5K8W3_PLAVS]	12.23	36	1	4	37	52.0055	8.78	3	19	52.6977	6.38	2	18	376	41.844	5.33838
Q5JPU0	Pyruvate dehydrogenase E1 component subunit alpha, somatic form, mitochondrial OS=Homo sapiens GN=PDHA1 PE=1 SV=1 - [Q5JPU0_HUMAN]	12.22	14	2	2	2	1.90566	7.22	1	1	2.36138	5	1	1	180	19.8321	9.14404
A0A024R1T5	2',3'-cyclic-nucleotide 3'-phosphodiesterase OS=Homo sapiens GN=CNP PE=3 SV=1 - [A0A024R1T5_HUMAN]	12.22	10	4	4	8	8.55675	5.74	3	4	12.6694	11.97	3	4	401	45.0703	8.52881
Q4R5Q6	Putative uncharacterized protein OS=Macaca fascicularis PE=2 SV=1 - [Q4R5Q6_MACFA]	12.22	25	3	3	4		0			10.9768	12.22	3	4	270	30.2988	9.51025
A0N588	Anti-CD4 mAb M-T310 variable region light chain (Fragment) OS=Mus sp. GN=Ig VL PE=2 SV=1 - [A0N588_9MURI]	12.21	1	1	1	1	3.89793	12.21	1	1		0			131	14.1849	4.4751
I7GLK6	Macaca fascicularis brain cDNA clone: QflA-18608, similar to human casein kinase 1, epsilon (CSNK1E), transcript variant 1, mRNA, RefSeq: NM_152221.2 OS=Macaca fascicularis PE=2 SV=1 - [I7GLK6_MACFA]	12.21	42	1	2	2	5.27556	12.21	2	2					213	24.2853	10.0669
F8W0R1	Endoplasmic reticulum-Golgi intermediate compartment protein 2 (Fragment) OS=Homo sapiens GN=ERGIC2 PE=1 SV=1 - [F8W0R1_HUMAN]	12.21	12	2	2	2					4.25434	12.21	2	2	172	19.4968	6.20166
A0A060RVL8	Histone H2B OS=Plasmodium reichenowi GN=H2Bv PE=3 SV=1 - [A0A060RVL8_PLARE]	12.2	2	1	1	5	8.15724	12.2	1	3	5.08931	12.2	1	2	123	13.7545	10.7993
G1QED3	Uncharacterized protein OS=Myotis lucifugus PE=3 SV=1 - [G1QED3_MYOLU]	12.2	3	1	2	6	4.43776	12.2	2	2	8.34169	4.07	1	4	246	26.555	7.48877
B4DPU3	cDNA FLJ56548, highly similar to Elongation factor 2 OS=Homo sapiens PE=2 SV=1 - [B4DPU3_HUMAN]	12.19	24	5	5	6	12.6173	8.83	4	4	5.47159	6.18	2	2	566	62.81	6.1001
P02761	Major urinary protein OS=Rattus norvegicus PE=1 SV=1 - [MUP_RAT]	12.15	1	2	2	4	5.45988	12.15	2	2	5.86623	8.29	1	2	181	20.7235	6.21436
C9JG32	Elongation factor Ts, mitochondrial (Fragment) OS=Homo sapiens GN=TSFM PE=1 SV=1 - [C9JG32_HUMAN]	12.14	7	1	1	1					4.15972	12.14	1	1	140	15.431	8.89502
A0A0U1RQF0	Fatty acid synthase OS=Homo sapiens GN=FASN PE=1 SV=1 - [A0A0U1RQF0_HUMAN]	12.12	6	20	20	39	47.6688	7.41	12	15	76.0773	10.48	18	24	2509	273.026	6.46826
H0W701	Uncharacterized protein OS=Cavia porcellus GN=PURA PE=4 SV=1 - [H0W701_CAVPO]	12.08	12	2	2	5	13.1596	12.08	2	3	10.1007	8.68	1	2	265	29.9842	7.29834
A0A0G2JL47	Large proline-rich protein BAG6 OS=Homo sapiens GN=BAG6 PE=1 SV=1 - [A0A0G2JL47_HUMAN]	12.07	16	8	8	13	22.7754	9.1	6	7	19.3451	6.59	5	6	1077	113.395	5.69385
Q5K684	SCCA1/SCCA2 fusion protein OS=Homo sapiens PE=2 SV=1 - [Q5K684_HUMAN]	12.05	3	2	3	4	12.8497	12.05	3	4		0			390	44.7416	6.63916
K7EL89	Spermidine synthase (Fragment) OS=Homo sapiens GN=SRM PE=1 SV=1 - [K7EL89_HUMAN]	12.05	6	1	1	1		0			2.52005	12.05	1	1	83	9.31562	8.20654
Q14257	Reticulocalbin-2 OS=Homo sapiens GN=RCN2 PE=1 SV=1 - [RCN2_HUMAN]	11.99	5	2	2	5	8.69512	11.99	2	3	7.58431	11.99	2	2	317	36.8536	4.39893
P40925	Malate dehydrogenase, cytoplasmic OS=Homo sapiens GN=MDH1 PE=1 SV=4 - [MDHC_HUMAN]	11.98	10	3	3	5	5.26377	8.08	2	2	5.01245	7.49	2	3	334	36.403	7.35693
A5K1A5	Actin II OS=Plasmodium vivax (strain Salvador I) GN=PVX_085830 PE=3 SV=1 - [A5K1A5_PLAVS]	11.97	15	1	3	44	72.3731	11.97	3	24	59.8551	7.71	2	20	376	42.4832	5.41455
B4DXG0	cDNA FLJ57651, highly similar to Ketosamine-3-kinase (EC 2.7.1.-) OS=Homo sapiens PE=2 SV=1 - [B4DXG0_HUMAN]	11.97	11	4	4	5		0			17.9489	11.97	4	5	259	28.9315	6.68311
H7C5A7	Acyl-coenzyme A thioesterase 8 (Fragment) OS=Homo sapiens GN=ACOT8 PE=1 SV=1 - [H7C5A7_HUMAN]	11.96	14	2	2	2	2.07174	4.31	1	1	1.61728	7.66	1	1	209	23.4282	9.56885
A0A1R3FK67	Transcription termination factor Rho OS=Vibrio sp. 10N.261.45.E1 GN=rho PE=3 SV=1 - [A0A1R3FK67_9VIBR]	11.93	31	1	3	7	10.5566	11.93	3	4	7.21537	9.31	2	3	419	46.8336	7.25439
H0V7S7	BRCA2 and CDKN1A-interacting protein OS=Cavia porcellus GN=BCCIP PE=3 SV=1 - [H0V7S7_CAVPO]	11.92	7	2	2	2	1.67814	3.08	1	1	4.01626	8.85	1	1	260	29.82	5.09717
H2QI71	Uncharacterized protein OS=Pan troglodytes PE=4 SV=1 - [H2QI71_PANTR]	11.91	8	2	2	2	7.19674	11.91	2	2					319	34.4532	6.55127
Q8N1H4	cDNA FLJ40872 fis, clone TUTER2000283, highly similar to Homo sapiens transformer-2-beta (SFRS10) gene OS=Homo sapiens PE=2 SV=1 - [Q8N1H4_HUMAN]	11.9	10	2	2	4	3.9458	6.35	1	1	11.3073	11.9	2	3	252	29.1832	10.6528
A0A086BVV9	Peptidoglycan-binding protein OS=Pseudomonas aeruginosa VRFPA01 GN=G039_0318615 PE=3 SV=1 - [A0A086BVV9_PSEAI]	11.9	3	1	1	7	6.26541	11.9	1	2	18.7288	11.9	1	5	168	17.9419	6.34131
A0A0S2Z578	Pyrroline-5-carboxylate reductase family member 2 isoform 2 OS=Homo sapiens GN=PYCR2 PE=2 SV=1 - [A0A0S2Z578_HUMAN]	11.88	7	1	1	2					4.12723	11.88	1	2	101	10.4172	9.61279
Q6FG43	FLOT2 protein OS=Homo sapiens GN=FLOT2 PE=2 SV=1 - [Q6FG43_HUMAN]	11.87	14	3	3	3					11.2721	11.87	3	3	379	41.6592	5.2876
A0A086C1D2	Protein RecA OS=Pseudomonas aeruginosa VRFPA01 GN=recA PE=3 SV=1 - [A0A086C1D2_PSEAI]	11.85	62	2	3	4	2.81887	8.67	2	2	2.1109	8.38	2	2	346	36.8562	5.51611
A5A6I5	Fructose-bisphosphate aldolase A OS=Pan troglodytes GN=ALDOA PE=2 SV=1 - [ALDOA_PANTR]	11.81	17	4	4	5	8.40619	5.77	3	3	6.29842	9.89	2	2	364	39.4093	8.08936
B2R4A5	cDNA, FLJ92019, highly similar to Homo sapiens mitochondrial ribosomal protein S14 (MRPS14), nuclear gene encoding mitochondrial protein, mRNA OS=Homo sapiens PE=2 SV=1 - [B2R4A5_HUMAN]	11.72	2	1	1	2	3.8119	11.72	1	1	2.33346	11.72	1	1	128	15.1481	11.5024
H3BPG5	RNA binding protein S1, serine-rich domain, isoform CRA_c OS=Homo sapiens GN=RNPS1 PE=1 SV=1 - [H3BPG5_HUMAN]	11.72	11	1	1	1					3.19943	11.72	1	1	128	15.0988	11.8687
A8KAQ6	cDNA FLJ76490, highly similar to Homo sapiens ancient ubiquitous protein 1 (AUP1), transcript variant 2, mRNA OS=Homo sapiens PE=2 SV=1 - [A8KAQ6_HUMAN]	11.71	9	3	3	3					9.11003	11.71	3	3	410	45.7771	8.79248
A2J1N5	Rheumatoid factor RF-ET6 (Fragment) OS=Homo sapiens PE=2 SV=1 - [A2J1N5_HUMAN]	11.7	1	1	1	1					0	11.7	1	1	94	10.4432	9.12939
G1NXE6	Uncharacterized protein OS=Myotis lucifugus GN=WDR5 PE=4 SV=1 - [G1NXE6_MYOLU]	11.68	8	3	3	5	7.39929	11.68	3	3	7.18584	4.79	1	2	334	36.5354	8.26514
B3KT66	Proteasome (Prosome, macropain) 26S subunit, non-ATPase, 6, isoform CRA_c OS=Homo sapiens GN=PSMD6 PE=2 SV=1 - [B3KT66_HUMAN]	11.66	9	3	3	4	2.79687	3.5	1	1	10.7925	8.16	2	3	343	40.3146	5.84619
G1TRH9	Uncharacterized protein OS=Oryctolagus cuniculus GN=LOC100359303 PE=4 SV=1 - [G1TRH9_RABIT]	11.65	11	3	3	7	12.3279	11.65	3	5	5.99816	9.09	2	2	352	39.5132	4.95752
F5H823	Ras-related protein Rap-1b (Fragment) OS=Homo sapiens GN=RAP1B PE=1 SV=1 - [F5H823_HUMAN]	11.65	16	1	1	1					2.11528	11.65	1	1	103	11.909	5.5542
H2Q156	Glutamyl-prolyl-tRNA synthetase OS=Pan troglodytes GN=EPRS PE=2 SV=1 - [H2Q156_PANTR]	11.64	17	10	10	18	36.4084	9.79	8	11	19.3636	6.94	6	7	1512	170.52	7.40088
A0A125QYY8	IBM-B1 light chain variable region (Fragment) OS=Homo sapiens PE=2 SV=1 - [A0A125QYY8_HUMAN]	11.61	1	1	1	1	3.72855	11.61	1	1		0			112	12.1591	8.49951
Q0IIN1	Keratin 77 OS=Homo sapiens GN=KRT77 PE=1 SV=1 - [Q0IIN1_HUMAN]	11.59	10	2	6	43	69.5057	9.52	5	23	55.8085	5.71	3	20	578	61.7644	5.84619
A8KA83	cDNA FLJ78586, highly similar to Homo sapiens VAMP (vesicle-associated membrane protein)-associated protein A, 33kDa (VAPA), mRNA OS=Homo sapiens PE=1 SV=1 - [A8KA83_HUMAN]	11.57	15	3	3	6	7.13155	5.79	1	2	15.3077	11.57	3	4	242	27.3	8.6167
Q32P04	Keratin 5 OS=Mus musculus GN=Krt5 PE=1 SV=2 - [Q32P04_MOUSE]	11.55	11	0	8	97	150.728	9.83	7	55	120.51	9.48	6	42	580	61.7286	7.75244
C6LW49	Histone H2B OS=Giardia intestinalis (strain ATCC 50581 / GS clone H7) GN=GL50581_3007 PE=3 SV=1 - [C6LW49_GIAIB]	11.54	1	1	1	3		0			1.79303	11.54	1	3	130	14.5527	9.72998
I3L4Y2	Myc-associated zinc finger protein (Fragment) OS=Homo sapiens GN=MAZ PE=1 SV=8 - [I3L4Y2_HUMAN]	11.54	4	1	1	2	2.4155	11.54	1	1	2.53565	11.54	1	1	78	8.52322	8.66064
F8VV32	Lysozyme C OS=Homo sapiens GN=LYZ PE=1 SV=1 - [F8VV32_HUMAN]	11.54	10	1	1	1					3.09875	11.54	1	1	104	11.4807	9.0708
Q53SY7	Putative uncharacterized protein CAD (Fragment) OS=Homo sapiens GN=CAD PE=3 SV=1 - [Q53SY7_HUMAN]	11.53	46	17	17	21	9.14341	1.77	3	3	55.9558	11.11	16	18	2151	235.029	6.59521
Q6NSB3	Alpha-amylase (Fragment) OS=Homo sapiens GN=AMY1A PE=2 SV=1 - [Q6NSB3_HUMAN]	11.52	32	1	4	5	1.86221	3.03	1	1	11.5784	11.52	4	4	495	56.1745	8.55811
H2RF08	Transcription initiation factor TFIID subunit 10 OS=Pan troglodytes GN=TAF10 PE=3 SV=1 - [H2RF08_PANTR]	11.52	2	1	1	2	1.86806	11.52	1	1	3.32805	11.52	1	1	217	21.5758	5.98584
F6NJU9	Potassium voltage-gated channel, shaker-related subfamily, beta member 1 b OS=Danio rerio GN=kcnab1b PE=4 SV=1 - [F6NJU9_DANRE]	11.49	4	1	3	5	5.50157	11.49	3	4	2.30271	5.17	1	1	348	38.907	8.67529
E9PIE4	Mitochondrial carrier homolog 2 (Fragment) OS=Homo sapiens GN=MTCH2 PE=1 SV=8 - [E9PIE4_HUMAN]	11.45	9	2	2	3					7.98297	11.45	2	3	262	28.5305	7.60596
M0QXU7	Mitochondrial import inner membrane translocase subunit TIM44 (Fragment) OS=Homo sapiens GN=TIMM44 PE=1 SV=1 - [M0QXU7_HUMAN]	11.36	7	3	3	4		0			11.6006	11.36	3	4	273	31.1413	9.48096
B3KUF5	cDNA FLJ39747 fis, clone SMINT2017432, highly similar to Target of Myb protein 1 OS=Homo sapiens PE=2 SV=1 - [B3KUF5_HUMAN]	11.35	5	1	1	1	4.17654	11.35	1	1					229	24.7252	4.56396
K7EN20	Hsp70-binding protein 1 (Fragment) OS=Homo sapiens GN=HSPBP1 PE=1 SV=1 - [K7EN20_HUMAN]	11.34	10	1	1	1					2.43951	11.34	1	1	97	10.6076	7.79639
H2Q2K2	Survival motor neuron domain containing 1 OS=Pan troglodytes GN=SMNDC1 PE=2 SV=1 - [H2Q2K2_PANTR]	11.34	2	1	1	1					3.93376	11.34	1	1	238	26.7085	7.23975
Q4G0N4	NAD kinase 2, mitochondrial OS=Homo sapiens GN=NADK2 PE=1 SV=2 - [NAKD2_HUMAN]	11.31	10	4	4	7	12.4575	11.31	4	5	5.41862	4.52	2	2	442	49.4022	8.17725
H2Q5L3	Cytidine monophosphate N-acetylneuraminic acid synthetase OS=Pan troglodytes GN=CMAS PE=2 SV=1 - [H2Q5L3_PANTR]	11.29	12	4	4	4		0			9.91231	11.29	4	4	434	48.3927	7.97217
J3KR24	Isoleucine--tRNA ligase, cytoplasmic OS=Homo sapiens GN=IARS PE=1 SV=1 - [J3KR24_HUMAN]	11.28	18	11	11	18	24.8602	8.33	8	9	24.731	8.16	8	9	1152	131.68	6.11279
I3NI20	Adenylate cyclase type 9 (Fragment) OS=Homo sapiens GN=ADCY9 PE=1 SV=1 - [I3NI20_HUMAN]	11.28	5	2	2	3	5.1571	11.28	2	2	2.48357	7	1	1	257	27.5878	6.53662
U3KLT3	Uncharacterized protein OS=Oryctolagus cuniculus PE=4 SV=1 - [U3KLT3_RABIT]	11.27	1	1	1	1	2.56559	11.27	1	1					142	15.3628	9.45166
H2RIF3	rRNA adenine N(6)-methyltransferase OS=Pan troglodytes GN=DIMT1 PE=3 SV=1 - [H2RIF3_PANTR]	11.27	10	3	3	3					8.21172	11.27	3	3	275	30.8239	10.2427
A0A1B0GV93	Very-long-chain 3-oxoacyl-CoA reductase OS=Homo sapiens GN=HSD17B12 PE=1 SV=1 - [A0A1B0GV93_HUMAN]	11.23	6	3	3	6	5.25611	5.8	1	2	10.5381	10.51	2	4	276	30.342	9.46631
A0A1B8V5E5	Dihydrolipoyllysine-residue succinyltransferase component of 2-oxoglutarate dehydrogenase complex OS=Pseudomonas sp. AU11447 GN=A6723_005540 PE=3 SV=1 - [A0A1B8V5E5_9PSED]	11.22	39	4	4	13	10.0979	7.07	2	3	25.9164	11.22	4	10	410	42.9524	5.66846
A0A1B8VAI9	50S ribosomal protein L18 OS=Pseudomonas sp. AU11447 GN=rplR PE=3 SV=1 - [A0A1B8VAI9_9PSED]	11.21	1	1	1	1	3.11163	11.21	1	1					116	12.6519	10.228
B7ZW15	Uncharacterized protein OS=Homo sapiens PE=2 SV=1 - [B7ZW15_HUMAN]	11.2	21	1	1	1					1.73439	11.2	1	1	125	13.9432	5.31299
H2QGK3	Uncharacterized protein OS=Pan troglodytes PE=4 SV=1 - [H2QGK3_PANTR]	11.19	5	3	3	3					8.80929	11.19	3	3	295	30.6435	7.07861
Q6PE78	Vacuolar protein sorting 26 homolog A (Yeast), isoform CRA_e OS=Mus musculus GN=Vps26a PE=2 SV=1 - [Q6PE78_MOUSE]	11.18	8	1	1	1					1.67361	11.18	1	1	161	18.953	9.20264
Q00896	Alpha-1-antitrypsin 1-3 OS=Mus musculus GN=Serpina1c PE=1 SV=2 - [A1AT3_MOUSE]	11.17	4	3	3	3	8.13798	11.17	3	3		0			412	45.7944	5.43994
G1P8D5	Uncharacterized protein OS=Myotis lucifugus GN=DRG1 PE=4 SV=1 - [G1P8D5_MYOLU]	11.17	18	3	3	4	3.00967	3.81	1	1	9.13544	11.17	3	3	367	40.5168	8.89502
H0YJS4	Eukaryotic translation initiation factor 2 subunit 1 (Fragment) OS=Homo sapiens GN=EIF2S1 PE=1 SV=1 - [H0YJS4_HUMAN]	11.11	7	2	2	2	2.30904	3.17	1	1	3.91759	7.94	1	1	252	28.9572	8.48486
A0A086BTL5	30S ribosomal protein S6 OS=Pseudomonas aeruginosa VRFPA01 GN=rpsF PE=3 SV=1 - [A0A086BTL5_PSEAI]	11.11	3	1	1	3	5.63723	11.11	1	2	1.81766	11.11	1	1	180	20.9541	5.12256
C9J6N9	Ubiquitin recognition factor in ER-associated degradation protein 1 (Fragment) OS=Homo sapiens GN=UFD1 PE=1 SV=8 - [C9J6N9_HUMAN]	11.11	14	1	1	2	2.8046	11.11	1	1	2.76104	11.11	1	1	135	15.3616	6.29053
A0A086BYI1	Succinate--CoA ligase [ADP-forming] subunit beta OS=Pseudomonas aeruginosa VRFPA01 GN=sucC PE=3 SV=1 - [A0A086BYI1_PSEAI]	11.08	13	2	3	4	9.25958	8.51	2	3	2.53602	2.58	1	1	388	41.4866	6.21436
H2QFK3	Uncharacterized protein OS=Pan troglodytes GN=DDX39A PE=4 SV=1 - [H2QFK3_PANTR]	11.08	45	1	5	11	8.30976	8.19	3	3	22.1419	11.08	5	8	415	47.1391	5.40186
H0UYB6	Uncharacterized protein OS=Cavia porcellus GN=DDX39B PE=4 SV=1 - [H0UYB6_CAVPO]	11.06	64	2	6	12	8.30976	8	3	3	24.7996	11.06	6	9	425	48.5187	5.57959
G1SY30	Uncharacterized protein OS=Oryctolagus cuniculus GN=SNRNP200 PE=4 SV=1 - [G1SY30_RABIT]	11.05	20	17	17	26	24.9511	6.04	9	9	49.0257	8.9	14	17	2136	244.376	6.0874
B3KSM6	cDNA FLJ36606 fis, clone TRACH2015654, highly similar to HEAT SHOCK 70 kDa PROTEIN 6 OS=Homo sapiens PE=2 SV=1 - [B3KSM6_HUMAN]	11.04	7	1	5	25	41.0943	11.04	4	12	44.2195	6.53	4	13	643	70.9282	6.13818
B4DWD0	cDNA FLJ50716 OS=Homo sapiens PE=2 SV=1 - [B4DWD0_HUMAN]	11.01	7	1	1	1					3.89703	11.01	1	1	109	13.1777	8.33838
A6MK85	7-dehydrocholesterol reductase-like protein (Fragment) OS=Callithrix jacchus PE=2 SV=1 - [A6MK85_CALJA]	11	8	1	1	1					2.96123	11	1	1	100	11.4006	8.60205
A0A086C289	30S ribosomal protein S19 OS=Pseudomonas aeruginosa VRFPA01 GN=rpsS PE=3 SV=1 - [A0A086C289_PSEAI]	10.99	10	1	1	1					0	10.99	1	1	91	10.3507	10.6235
P26641	Elongation factor 1-gamma OS=Homo sapiens GN=EEF1G PE=1 SV=3 - [EF1G_HUMAN]	10.98	14	4	4	8	5.03538	4.58	2	2	18.236	10.98	4	6	437	50.0871	6.66846
P04746	Pancreatic alpha-amylase OS=Homo sapiens GN=AMY2A PE=1 SV=2 - [AMYP_HUMAN]	10.96	37	2	5	6	10.2255	5.87	3	3	8.59741	8.02	3	3	511	57.67	7.04932
Q8IXM3	39S ribosomal protein L41, mitochondrial OS=Homo sapiens GN=MRPL41 PE=1 SV=1 - [RM41_HUMAN]	10.95	1	1	1	1		0			2.21192	10.95	1	1	137	15.373	9.56885
P00698	Lysozyme C OS=Gallus gallus GN=LYZ PE=1 SV=1 - [LYSC_CHICK]	10.88	1	1	1	2	3.57191	10.88	1	1	3.9557	10.88	1	1	147	16.228	9.0708
K9IHR3	Proteasome subunit beta type OS=Desmodus rotundus PE=2 SV=1 - [K9IHR3_DESRO]	10.83	9	2	2	3	2.7927	5.83	1	1	5.4633	10.83	2	2	240	26.2732	7.73779
Q7Z780	U2 small nuclear RNA auxiliary factor 1 OS=Homo sapiens GN=U2AF1 PE=2 SV=1 - [Q7Z780_HUMAN]	10.78	9	1	1	4	9.49207	10.78	1	2	8.75792	10.78	1	2	167	19.8016	9.27588
H2PYA9	Uncharacterized protein OS=Pan troglodytes PE=4 SV=1 - [H2PYA9_PANTR]	10.77	11	1	1	1	0	10.77	1	1		0			130	14.6249	9.94971
V9GYR2	Sodium/potassium-transporting ATPase subunit beta (Fragment) OS=Homo sapiens GN=ATP1B1 PE=1 SV=1 - [V9GYR2_HUMAN]	10.77	9	1	1	1					2.6177	10.77	1	1	130	15.1156	6.16357
I7GH45	Macaca fascicularis brain cDNA clone: QmoA-10305, similar to human glutaryl-Coenzyme A dehydrogenase (GCDH), nuclear geneencoding mitochondrial protein, transcript variant 2, mRNA, RefSeq: NM_013976.1 OS=Macaca fascicularis PE=2 SV=1 - [I7GH45_MACFA]	10.7	14	3	3	3	2.3632	3.95	1	1	4.86863	6.74	2	2	430	47.6452	8.646
H2RAT1	Annexin OS=Pan troglodytes GN=ANXA5 PE=3 SV=1 - [H2RAT1_PANTR]	10.66	11	3	3	4	7.79368	10.66	3	3	2.59398	2.82	1	1	319	35.7834	5.04639
H0V505	Uncharacterized protein OS=Cavia porcellus PE=4 SV=1 - [H0V505_CAVPO]	10.66	1	1	1	1					2.40596	10.66	1	1	122	13.3787	5.36377
Q05CM9	PSIP1 protein (Fragment) OS=Homo sapiens GN=PSIP1 PE=2 SV=1 - [Q05CM9_HUMAN]	10.65	9	2	2	3					10.1856	10.65	2	3	263	29.6524	9.39307
G1U4I1	Uncharacterized protein OS=Oryctolagus cuniculus PE=4 SV=1 - [G1U4I1_RABIT]	10.61	14	1	1	3	5.10799	10.61	1	2	3.22535	10.61	1	1	132	15.4996	11.312
Q08JA8	APH(3') family aminoglycoside O-phosphotransferase OS=Escherichia coli GN=aph PE=3 SV=1 - [Q08JA8_ECOLX]	10.61	4	2	2	2	6.77347	10.61	2	2					264	29.0295	4.80518
G1NX74	Proteasome subunit beta OS=Myotis lucifugus GN=PSMB4 PE=3 SV=1 - [G1NX74_MYOLU]	10.61	5	2	2	11	15.0835	10.61	2	5	16.9471	10.61	2	6	264	28.9404	5.61768
A6MK54	Mitochondrial isocitrate dehydrogenase (NADP)-like protein (Fragment) OS=Callithrix jacchus PE=2 SV=1 - [A6MK54_CALJA]	10.6	9	1	1	1		0			2.27179	10.6	1	1	151	16.4613	6.78564
H0Y9X3	Programmed cell death protein 6 (Fragment) OS=Homo sapiens GN=PDCD6 PE=1 SV=1 - [H0Y9X3_HUMAN]	10.58	9	1	1	1					2.08362	10.58	1	1	104	12.1631	5.17334
A0A0N0M9K8	Peptide ABC transporter ATP-binding protein OS=Oceanobacillus caeni GN=AFL42_04990 PE=3 SV=1 - [A0A0N0M9K8_9BACI]	10.56	1	1	1	1		0			0	10.56	1	1	341	38.165	6.94678
A0A024R4A5	Trinucleotide repeat containing 15, isoform CRA_a OS=Homo sapiens GN=TNRC15 PE=4 SV=1 - [A0A024R4A5_HUMAN]	10.55	22	8	8	11	11.2135	5.86	4	4	24.6676	7.16	6	7	1298	149.85	5.5415
A0A0S2Z5C7	Family with sequence similarity 64 member A isoform 2 OS=Homo sapiens GN=FAM64A PE=2 SV=1 - [A0A0S2Z5C7_HUMAN]	10.5	9	2	2	4	5.97706	10.5	2	2	8.4613	7.14	1	2	238	26.2264	9.90576
G1Q4U0	60S ribosomal protein L36 OS=Myotis lucifugus GN=LOC102417631 PE=3 SV=1 - [G1Q4U0_MYOLU]	10.48	5	1	1	4	2.85018	10.48	1	1	9.18354	10.48	1	3	105	12.1777	11.1069
O00488	Zinc finger protein 593 OS=Homo sapiens GN=ZNF593 PE=1 SV=2 - [ZN593_HUMAN]	10.45	1	1	1	1					2.54596	10.45	1	1	134	15.1897	9.81787
H0UWR7	Uncharacterized protein OS=Cavia porcellus GN=LOC100714101 PE=3 SV=1 - [H0UWR7_CAVPO]	10.43	15	4	4	7	6.27027	6.83	2	2	16.6624	7.73	3	5	556	60.2505	5.98584
G1PY77	Uncharacterized protein (Fragment) OS=Myotis lucifugus GN=ACTL6A PE=3 SV=1 - [G1PY77_MYOLU]	10.43	8	2	2	2					6.40691	10.43	2	2	422	46.8972	6.25244
A0A060RXZ0	Protein kinase 5 OS=Plasmodium reichenowi GN=PK5 PE=3 SV=1 - [A0A060RXZ0_PLARE]	10.42	475	1	3	9	6.86119	10.42	3	4	9.66421	10.42	3	5	288	33.0034	7.89893
D5V8C8	50S ribosomal protein L17 OS=Moraxella catarrhalis (strain BBH18) GN=rplQ PE=3 SV=1 - [D5V8C8_MORCB]	10.42	3	1	1	3	2.17932	10.42	1	1	4.92781	10.42	1	2	96	11.0028	9.81787
F8W1I4	La-related protein 4 (Fragment) OS=Homo sapiens GN=LARP4 PE=1 SV=1 - [F8W1I4_HUMAN]	10.4	11	1	1	1	2.01293	10.4	1	1					125	14.1338	4.41162
Q7Z3K9	Putative uncharacterized protein DKFZp781L0540 (Fragment) OS=Homo sapiens GN=DKFZp781L0540 PE=2 SV=1 - [Q7Z3K9_HUMAN]	10.39	20	6	6	12	22.2459	10.39	6	7	15.5157	7.51	4	5	799	89.9667	5.64307
H0W4A6	Uncharacterized protein OS=Cavia porcellus GN=CCT7 PE=3 SV=1 - [H0W4A6_CAVPO]	10.39	15	4	4	5	10.4159	8.16	3	4	1.8922	2.23	1	1	539	58.9707	7.28369
D3Z6F5	ATP synthase subunit alpha OS=Mus musculus GN=Atp5a1 PE=1 SV=1 - [D3Z6F5_MOUSE]	10.34	160	3	4	6	12.6464	10.34	4	4	5.45009	2.58	1	2	503	54.5607	8.23584
H2QBC3	Uncharacterized protein OS=Pan troglodytes PE=4 SV=1 - [H2QBC3_PANTR]	10.34	3	1	1	1					2.1462	10.34	1	1	203	22.7982	9.67139
I7GNQ3	Macaca fascicularis brain cDNA clone: QflA-21878, similar to human adenylate kinase 2 (AK2), transcript variant AK2B, mRNA, RefSeq: NM_013411.2 OS=Macaca fascicularis PE=2 SV=1 - [I7GNQ3_MACFA]	10.32	6	1	1	1					2.10064	10.32	1	1	155	17.7283	7.50342
E9QES2	DAZ-associated protein 1 OS=Danio rerio GN=dazap1 PE=4 SV=1 - [E9QES2_DANRE]	10.32	14	1	1	1					3.73323	10.32	1	1	155	17.4597	8.86572
A0A0A0MRM8	Unconventional myosin-VI OS=Homo sapiens GN=MYO6 PE=1 SV=1 - [A0A0A0MRM8_HUMAN]	10.3	18	9	9	16	19.7305	5.75	5	6	31.6626	10.3	9	10	1253	144.924	8.55811
F8WBJ6	RNA-binding protein PNO1 OS=Homo sapiens GN=PNO1 PE=1 SV=1 - [F8WBJ6_HUMAN]	10.29	12	1	1	2	2.56308	10.29	1	1	3.57648	10.29	1	1	136	15.1659	9.81787
B1AKQ8	Guanine nucleotide-binding protein G(I)/G(S)/G(T) subunit beta-1 (Fragment) OS=Homo sapiens GN=GNB1 PE=1 SV=8 - [B1AKQ8_HUMAN]	10.28	21	1	1	1					2.83251	10.28	1	1	107	12.1903	9.56885
P07489	Transthyretin OS=Oryctolagus cuniculus GN=TTR PE=1 SV=1 - [TTHY_RABIT]	10.24	4	1	1	1	2.56387	10.24	1	1		0			127	13.6489	6.15088
B5MCZ9	Glutaminyl-peptide cyclotransferase (Fragment) OS=Homo sapiens GN=QPCT PE=1 SV=1 - [B5MCZ9_HUMAN]	10.21	9	1	2	5	9.90457	10.21	2	4	3.05823	4.93	1	1	284	32.0875	7.50342
F8WCA5	RNA-binding protein 6 OS=Homo sapiens GN=RBM6 PE=1 SV=1 - [F8WCA5_HUMAN]	10.19	12	5	5	7	17.0362	10.19	5	6	2.08996	2.3	1	1	697	80.3404	5.84619
A0A1B8VCK3	Malate dehydrogenase OS=Pseudomonas sp. AU11447 GN=A6723_016665 PE=4 SV=1 - [A0A1B8VCK3_9PSED]	10.19	4	3	3	6	4.48138	6.87	2	2	9.80972	10.19	3	4	422	45.3486	5.45264
A0A1B8TJN1	Uncharacterized protein OS=Pseudomonas sp. AU12215 GN=A9513_020305 PE=4 SV=1 - [A0A1B8TJN1_9PSED]	10.18	3	1	1	1	3.00375	10.18	1	1					167	18.6799	9.29053
A0A0G2IXJ0	Hsp70-like protein OS=Emmonsia crescens UAMH 3008 GN=EMCG_05417 PE=3 SV=1 - [A0A0G2IXJ0_9EURO]	10.15	83	1	5	23	32.0332	5.41	3	9	47.2618	10.15	5	14	591	64.7938	8.68994
A0A0S4XQW8	MHC class I antigen OS=Homo sapiens GN=HLA-A PE=3 SV=1 - [A0A0S4XQW8_HUMAN]	10.14	306	2	2	3	2.14321	3.56	1	1	6.36003	10.14	2	2	365	40.9932	6.90283
F5H442	Tumor susceptibility gene 101 protein OS=Homo sapiens GN=TSG101 PE=1 SV=1 - [F5H442_HUMAN]	10.14	13	3	3	3					7.68028	10.14	3	3	365	40.8917	5.30029
A0A0A8U8E2	Dihydrolipoyllysine-residue succinyltransferase component of 2-oxoglutarate dehydrogenase complex OS=Escherichia coli O26:H11 GN=sucB PE=3 SV=1 - [A0A0A8U8E2_ECOLX]	10.12	9	2	2	2	5.84724	10.12	2	2		0			405	43.984	5.80811
Q27J81	Inverted formin-2 OS=Homo sapiens GN=INF2 PE=1 SV=2 - [INF2_HUMAN]	10.09	4	8	8	10	8.27408	3.68	3	4	15.9922	7.77	6	6	1249	135.54	5.37646
P24752	Acetyl-CoA acetyltransferase, mitochondrial OS=Homo sapiens GN=ACAT1 PE=1 SV=1 - [THIL_HUMAN]	10.07	2	3	3	4	6.48646	7.03	2	2	6.2101	7.03	2	2	427	45.1706	8.85107
K7ES46	DNA excision repair protein ERCC-1 (Fragment) OS=Homo sapiens GN=ERCC1 PE=1 SV=1 - [K7ES46_HUMAN]	10.05	4	1	1	1		0			0	10.05	1	1	209	23.2771	5.68115
P20674	Cytochrome c oxidase subunit 5A, mitochondrial OS=Homo sapiens GN=COX5A PE=1 SV=2 - [COX5A_HUMAN]	10	2	1	1	1					2.18522	10	1	1	150	16.7517	6.78564
O95969	Secretoglobin family 1D member 2 OS=Homo sapiens GN=SCGB1D2 PE=2 SV=1 - [SG1D2_HUMAN]	10	1	1	1	1					2.14531	10	1	1	90	9.91834	8.25049
F8VUA6	60S ribosomal protein L18 (Fragment) OS=Homo sapiens GN=RPL18 PE=1 SV=1 - [F8VUA6_HUMAN]	10	12	1	1	1					2.89089	10	1	1	130	14.5201	11.7515
F8KRU2	50S ribosomal protein L11 OS=Helicobacter bizzozeronii (strain CIII-1) GN=rplK PE=3 SV=1 - [F8KRU2_HELBC]	9.93	2	1	1	1	1.82889	9.93	1	1		0			141	15.2371	9.67139
H0VNV2	Clathrin light chain OS=Cavia porcellus GN=CLTA PE=3 SV=1 - [H0VNV2_CAVPO]	9.91	4	1	1	1	2.70402	9.91	1	1		0			212	23.1832	4.52588
Q6P2Q9	Pre-mRNA-processing-splicing factor 8 OS=Homo sapiens GN=PRPF8 PE=1 SV=2 - [PRP8_HUMAN]	9.89	49	16	16	23	8.99622	1.93	4	5	49.4766	9.55	15	18	2335	273.427	8.83643
A0A086BWU0	50S ribosomal protein L13 OS=Pseudomonas aeruginosa VRFPA01 GN=rplM PE=3 SV=1 - [A0A086BWU0_PSEAI]	9.86	2	1	1	1	3.14001	9.86	1	1					142	16.0455	9.83252
A0A024R9Y3	HECT, UBA and WWE domain containing 1, isoform CRA_a OS=Homo sapiens GN=HUWE1 PE=4 SV=1 - [A0A024R9Y3_HUMAN]	9.82	28	26	26	60	100.787	6.42	17	31	97.884	6.84	19	29	4359	479.853	5.21143
C9J3L8	Translocon-associated protein subunit alpha OS=Homo sapiens GN=SSR1 PE=1 SV=1 - [C9J3L8_HUMAN]	9.81	15	2	2	5	2.02611	5.66	1	1	10.8861	9.81	2	4	265	29.5548	4.29736
F6LK85	Envelope glycoprotein (Fragment) OS=Human immunodeficiency virus 1 GN=env PE=4 SV=1 - [F6LK85_9HIV1]	9.81	6	1	1	1		0			0	9.81	1	1	214	23.8457	8.45557
D6RHW1	Transcription initiation factor TFIID subunit 9 (Fragment) OS=Homo sapiens GN=TAF9 PE=1 SV=3 - [D6RHW1_HUMAN]	9.8	16	1	1	1		0			2.24888	9.8	1	1	102	11.5628	7.18115
P50446	Keratin, type II cytoskeletal 6A OS=Mus musculus GN=Krt6a PE=1 SV=3 - [K2C6A_MOUSE]	9.76	12	0	6	94	145.663	7.96	5	52	125.669	9.76	6	42	553	59.2986	7.94287
K1TB66	Aldo/keto reductase (Fragment) OS=human gut metagenome GN=OBE_07340 PE=4 SV=1 - [K1TB66_9ZZZZ]	9.76	1	1	1	1					2.78678	9.76	1	1	205	23.8052	8.98291
H2QQK7	Thyroid hormone receptor interactor 13 OS=Pan troglodytes GN=TRIP13 PE=2 SV=1 - [H2QQK7_PANTR]	9.72	7	4	4	4					11.3904	9.72	4	4	432	48.4884	6.0874
G1SMM5	Uncharacterized protein OS=Oryctolagus cuniculus GN=DNAJA2 PE=3 SV=1 - [G1SMM5_RABIT]	9.71	5	2	2	2		0			7.12662	9.71	2	2	412	45.7306	6.48096
M0QZK8	Uncharacterized protein OS=Homo sapiens PE=4 SV=1 - [M0QZK8_HUMAN]	9.71	4	1	1	1					1.87861	9.71	1	1	103	11.5708	4.91943
A0PJ47	SAFB2 protein (Fragment) OS=Homo sapiens GN=SAFB2 PE=2 SV=1 - [A0PJ47_HUMAN]	9.7	13	3	3	5	2.22807	1.71	1	1	12.1994	9.7	3	4	526	56.8839	4.79248
A0PJ62	RPL14 protein (Fragment) OS=Homo sapiens GN=RPL14 PE=2 SV=1 - [A0PJ62_HUMAN]	9.68	16	1	1	1					3.05369	9.68	1	1	124	14.6019	10.6235
P11388	DNA topoisomerase 2-alpha OS=Homo sapiens GN=TOP2A PE=1 SV=3 - [TOP2A_HUMAN]	9.67	44	9	12	16	5.85078	1.57	2	2	39.459	8.95	11	14	1531	174.276	8.71924
B5MCX3	Septin-2 OS=Homo sapiens GN=SEPT2 PE=1 SV=1 - [B5MCX3_HUMAN]	9.66	20	2	2	2		0			6.2705	9.66	2	2	321	36.9169	6.17627
A0Q874	Elongation factor Tu OS=Francisella tularensis subsp. novicida (strain U112) GN=tuf PE=3 SV=1 - [EFTU_FRATN]	9.64	13	1	3	14	17.2712	9.64	3	7	18.7928	9.64	3	7	394	43.3631	5.22412
H2QCY9	Uncharacterized protein OS=Pan troglodytes GN=KRT32 PE=3 SV=1 - [H2QCY9_PANTR]	9.6	37	0	4	11	19.1836	7.14	3	10	1.87992	2.46	1	1	448	50.3112	4.88135
G4VFJ0	Peptidyl-prolyl cis-trans isomerase OS=Schistosoma mansoni GN=Smp_029900.2 PE=3 SV=1 - [G4VFJ0_SCHMA]	9.59	9	1	1	2		0			5.48204	9.59	1	2	146	15.9359	8.74854
Q05CW6	PSMD1 protein (Fragment) OS=Homo sapiens GN=PSMD1 PE=2 SV=1 - [Q05CW6_HUMAN]	9.58	23	6	6	12	19.3876	8.64	5	7	14.3782	4.79	4	5	856	94.6696	7.23975
E9PPU6	N-acetyl-D-glucosamine kinase (Fragment) OS=Homo sapiens GN=NAGK PE=1 SV=2 - [E9PPU6_HUMAN]	9.57	15	1	1	1					2.64176	9.57	1	1	94	10.7813	6.91748
H2QBF9	Exosome component 6 OS=Pan troglodytes GN=EXOSC6 PE=2 SV=1 - [H2QBF9_PANTR]	9.56	2	2	2	3	5.51658	9.56	2	2	3.80191	5.51	1	1	272	28.2477	6.27783
H2QRV3	Uncharacterized protein OS=Pan troglodytes GN=LARP1 PE=4 SV=1 - [H2QRV3_PANTR]	9.52	18	7	7	12	16.6805	7.85	6	6	16.4887	6.87	5	6	1019	116.324	9.08545
T0T2A6	Elongation factor Tu OS=Veillonella parvula HSIVP1 GN=tuf PE=3 SV=1 - [T0T2A6_9FIRM]	9.51	10	2	2	4		0			10.0852	9.51	2	4	368	40.1853	4.77979
A0A086C120	50S ribosomal protein L19 OS=Pseudomonas aeruginosa VRFPA01 GN=rplS PE=3 SV=1 - [A0A086C120_PSEAI]	9.48	2	1	1	1					2.7295	9.48	1	1	116	13.0242	10.4038
E5RHW4	Erlin-2 (Fragment) OS=Homo sapiens GN=ERLIN2 PE=1 SV=1 - [E5RHW4_HUMAN]	9.47	6	2	2	2	3.20674	4.44	1	1	2.71543	5.03	1	1	338	37.7014	5.61768
H7C5Q2	Acyl-coenzyme A thioesterase 9, mitochondrial (Fragment) OS=Homo sapiens GN=ACOT9 PE=1 SV=1 - [H7C5Q2_HUMAN]	9.47	3	1	1	1					4.25461	9.47	1	1	264	30.0282	7.45947
H0YDP7	39S ribosomal protein L49, mitochondrial (Fragment) OS=Homo sapiens GN=MRPL49 PE=1 SV=1 - [H0YDP7_HUMAN]	9.45	7	1	1	1	2.30135	9.45	1	1					127	14.6728	10.2134
A1A5C5	RRBP1 protein OS=Homo sapiens GN=RRBP1 PE=2 SV=1 - [A1A5C5_HUMAN]	9.45	14	4	4	5	2.08006	1.86	1	1	13.7531	9.45	4	4	751	84.2561	5.0083
B3KPT2	Inactive rhomboid protein OS=Homo sapiens PE=2 SV=1 - [B3KPT2_HUMAN]	9.45	16	3	3	11	13.2316	9.45	3	5	20.2496	9.45	3	6	529	60.166	9.96436
G1NY16	Uncharacterized protein OS=Myotis lucifugus GN=SNU13 PE=4 SV=1 - [G1NY16_MYOLU]	9.45	7	1	1	4	6.72284	9.45	1	2	6.71895	9.45	1	2	127	14.0335	8.45557
Q792E4	H2-K region expressed gene 2 OS=Mus musculus GN=Pfdn6 PE=1 SV=1 - [Q792E4_MOUSE]	9.45	3	1	1	1					2.04588	9.45	1	1	127	14.4457	8.88037
Q5JNZ6	Histone-binding protein RBBP7 (Fragment) OS=Homo sapiens GN=RBBP7 PE=1 SV=1 - [Q5JNZ6_HUMAN]	9.41	25	1	1	1	2.24936	9.41	1	1					85	9.51932	3.87842
A8K4Z2	cDNA FLJ77120, highly similar to Homo sapiens replication factor C (activator 1) 5, 36.5kDa (RFC5), transcript variant 2, mRNA OS=Homo sapiens PE=2 SV=1 - [A8K4Z2_HUMAN]	9.41	14	2	2	2	2.61242	3.92	1	1	2.66036	5.49	1	1	255	28.7681	6.55127
E5RGS4	Prefoldin subunit 1 OS=Homo sapiens GN=PFDN1 PE=1 SV=1 - [E5RGS4_HUMAN]	9.4	7	1	1	1					2.34804	9.4	1	1	117	13.4571	5.51611
A0A1B0GTT5	Vimentin (Fragment) OS=Homo sapiens GN=VIM PE=1 SV=1 - [A0A1B0GTT5_HUMAN]	9.4	12	1	1	1					3.57751	9.4	1	1	149	16.4155	10.2573
G1SHR7	Uncharacterized protein OS=Oryctolagus cuniculus GN=KCMF1 PE=4 SV=2 - [G1SHR7_RABIT]	9.39	8	2	2	6	5.4574	9.39	2	2	11.2321	9.39	2	4	330	36.1633	5.22412
A0A0A8UB64	30S ribosomal protein S1 OS=Escherichia coli O26:H11 GN=rpsA PE=3 SV=1 - [A0A0A8UB64_ECOLX]	9.34	10	3	3	3	7.25353	9.34	3	3					557	61.1207	4.98291
A1A925	Cyclic pyranopterin monophosphate synthase OS=Escherichia coli O1:K1 / APEC GN=moaC PE=3 SV=1 - [MOAC_ECOK1]	9.32	2	1	1	7					9.58124	9.32	1	7	161	17.456	7.10791
A0A0G2HX68	Uncharacterized protein OS=Emmonsia crescens UAMH 3008 GN=EMCG_02716 PE=4 SV=1 - [A0A0G2HX68_9EURO]	9.3	3	1	1	1		0			1.91347	9.3	1	1	86	9.41932	9.70068
H0UZ85	Uncharacterized protein OS=Cavia porcellus GN=COX5B PE=4 SV=1 - [H0UZ85_CAVPO]	9.3	4	1	1	1					2.40648	9.3	1	1	129	13.5939	8.20654
A0A086C2Q2	3-phosphoglycerate dehydrogenase OS=Pseudomonas aeruginosa VRFPA01 GN=G039_0301505 PE=3 SV=1 - [A0A086C2Q2_PSEAI]	9.29	9	3	3	7	12.905	6.85	2	4	8.80075	9.29	3	3	409	44.1892	6.53662
Q86WV4	MRPS9 protein (Fragment) OS=Homo sapiens GN=MRPS9 PE=2 SV=1 - [Q86WV4_HUMAN]	9.27	3	2	2	2	5.009	9.27	2	2					302	35.1261	9.0708
A0A093EFK5	Galactitol-1-phosphate 5-dehydrogenase OS=Escherichia coli GN=AA102_01740 PE=3 SV=1 - [A0A093EFK5_ECOLX]	9.25	9	2	2	3	9.44969	9.25	2	3					346	37.4543	6.22705
A0A1X8X1S7	Formyltetrahydrofolate deformylase (Fragment) OS=Escherichia coli GN=ACN87_15820 PE=4 SV=1 - [A0A1X8X1S7_ECOLX]	9.24	7	1	1	1					2.0191	9.24	1	1	184	20.9628	6.63916
A0A086C298	30S ribosomal protein S8 OS=Pseudomonas aeruginosa VRFPA01 GN=rpsH PE=3 SV=1 - [A0A086C298_PSEAI]	9.23	2	1	1	1					2.85719	9.23	1	1	130	14.1615	9.56885
B0QYK0	RNA-binding protein EWS OS=Homo sapiens GN=EWSR1 PE=1 SV=1 - [B0QYK0_HUMAN]	9.22	21	5	5	45	66.867	9.22	5	20	76.9373	9.22	5	25	618	64.8891	9.37842
Q9UKD2	mRNA turnover protein 4 homolog OS=Homo sapiens GN=MRTO4 PE=1 SV=2 - [MRT4_HUMAN]	9.21	6	2	2	4	4.707	4.18	1	2	5.14698	9.21	2	2	239	27.5429	8.29443
I7G8K8	Macaca fascicularis brain cDNA clone: QmoA-11786, similar to human microsomal glutathione S-transferase 3 (MGST3), mRNA, RefSeq: NM_004528.2 OS=Macaca fascicularis GN=MGST3 PE=2 SV=1 - [I7G8K8_MACFA]	9.21	6	1	1	2	2.84336	9.21	1	1	3.32718	9.21	1	1	152	16.4835	9.37842
O95071	E3 ubiquitin-protein ligase UBR5 OS=Homo sapiens GN=UBR5 PE=1 SV=2 - [UBR5_HUMAN]	9.18	19	15	15	23	29.9721	6.36	10	10	36.6327	7	11	13	2799	309.158	5.84619
A0A1D3CL60	Elongation factor Tu OS=Chlamydophila psittaci GN=tuf PE=3 SV=1 - [A0A1D3CL60_CHLPS]	9.14	2	2	2	4	8.11121	9.14	2	3	2.76075	4.82	1	1	394	43.1861	5.51611
A0A0A8U4R7	2-oxoglutarate decarboxylase, thiamin-requiring OS=Escherichia coli O26:H11 GN=sucA PE=4 SV=1 - [A0A0A8U4R7_ECOLX]	9.11	15	6	6	8	8.72293	6	3	3	12.0811	4.07	4	5	933	104.996	6.49365
H2RA97	Uncharacterized protein OS=Pan troglodytes PE=4 SV=1 - [H2RA97_PANTR]	9.1	15	6	6	13	16.8849	7.39	5	5	26.4674	9.1	6	8	1055	111.379	8.48486
A0A1S1KUQ9	Uncharacterized protein OS=Mycobacterium chelonae GN=BKG71_04495 PE=4 SV=1 - [A0A1S1KUQ9_MYCCH]	9.09	3	1	1	1		0			0	9.09	1	1	440	48.3463	8.57275
P01876	Immunoglobulin heavy constant alpha 1 OS=Homo sapiens GN=IGHA1 PE=1 SV=2 - [IGHA1_HUMAN]	9.07	18	2	2	2	3.40276	4.82	1	1	3.3852	4.25	1	1	353	37.6306	6.50732
A0A024RC87	Ribonuclease/angiogenin inhibitor 1, isoform CRA_a OS=Homo sapiens GN=RNH1 PE=4 SV=1 - [A0A024RC87_HUMAN]	8.99	11	3	3	3					8.86447	8.99	3	3	456	49.3848	4.84326
Q13084	39S ribosomal protein L28, mitochondrial OS=Homo sapiens GN=MRPL28 PE=1 SV=4 - [RM28_HUMAN]	8.98	1	1	1	2	3.25017	8.98	1	1	3.58696	8.98	1	1	256	30.1379	8.29443
G7YC01	Histone H3 OS=Clonorchis sinensis GN=CLF_104603 PE=3 SV=1 - [G7YC01_CLOSI]	8.97	10	1	2	7		0			20.539	8.97	2	7	223	24.805	9.89111
P54709	Sodium/potassium-transporting ATPase subunit beta-3 OS=Homo sapiens GN=ATP1B3 PE=1 SV=1 - [AT1B3_HUMAN]	8.96	8	2	2	4	2.42161	3.94	1	1	8.42777	8.96	2	3	279	31.4921	8.35303
H2QE68	Uncharacterized protein OS=Pan troglodytes GN=TYMS PE=3 SV=1 - [H2QE68_PANTR]	8.96	13	2	2	4	4.53486	3.94	1	2	5.7655	8.96	2	2	279	31.7112	6.80029
M0R0U3	6-phosphogluconolactonase OS=Homo sapiens GN=PGLS PE=1 SV=1 - [M0R0U3_HUMAN]	8.94	4	1	1	1					3.26292	8.94	1	1	179	18.8998	7.84033
Q4R420	Testis cDNA clone: QtsA-12731, similar to human casein kinase 2, alpha prime polypeptide (CSNK2A2) OS=Macaca fascicularis PE=2 SV=1 - [Q4R420_MACFA]	8.92	10	1	1	2	2.66889	8.92	1	1	2.5058	8.92	1	1	213	25.2626	6.99072
H2QFG2	Uncharacterized protein OS=Pan troglodytes GN=WDR83 PE=4 SV=1 - [H2QFG2_PANTR]	8.92	8	2	2	3	6.5536	8.92	2	2	3.18755	4.46	1	1	314	34.1507	5.45264
A8K773	cDNA FLJ78361 OS=Homo sapiens PE=2 SV=1 - [A8K773_HUMAN]	8.91	4	1	1	1	2.06071	8.91	1	1					101	11.4063	10.228
K7EMY7	Haloacid dehalogenase-like hydrolase domain-containing protein 2 (Fragment) OS=Homo sapiens GN=HDHD2 PE=1 SV=1 - [K7EMY7_HUMAN]	8.9	8	1	1	1	2.54065	8.9	1	1					146	16.4028	8.1626
I7GJE3	Macaca fascicularis brain cDNA clone: QtrA-17351, similar to human BCL2-associated athanogene 2 (BAG2), mRNA, RefSeq: NM_004282.2 OS=Macaca fascicularis PE=2 SV=1 - [I7GJE3_MACFA]	8.9	4	1	1	1					0	8.9	1	1	191	21.5932	5.88428
G1P4Q2	Uncharacterized protein OS=Myotis lucifugus GN=KRT77 PE=3 SV=1 - [G1P4Q2_MYOLU]	8.89	7	1	4	40	60.5047	5.3	3	20	53.2858	7.18	3	20	585	62.4218	6.96143
G7YY73	Uncharacterized protein (Fragment) OS=Clonorchis sinensis GN=CLF_113332 PE=4 SV=1 - [G7YY73_CLOSI]	8.88	2	2	2	2	2.92116	8.88	1	1	1.68634	8.28	1	1	169	18.1405	5.60498
O14992	HS24/P52 OS=Homo sapiens GN=HS24/p52 PE=2 SV=1 - [O14992_HUMAN]	8.86	18	3	3	3	2.87871	3.16	1	1	5.08282	5.7	2	2	474	52.3338	8.20654
A0A1B0GVL3	Ubiquitin-protein ligase E3A OS=Homo sapiens GN=UBE3A PE=1 SV=1 - [A0A1B0GVL3_HUMAN]	8.86	16	5	5	9	10.1387	7.26	4	4	15.9622	7.01	4	5	813	93.4848	5.12256
B1AHF3	NADH-cytochrome b5 reductase 3 (Fragment) OS=Homo sapiens GN=CYB5R3 PE=1 SV=1 - [B1AHF3_HUMAN]	8.84	6	1	1	1					1.85621	8.84	1	1	147	16.6859	9.72998
F8VR77	Proliferation-associated protein 2G4 OS=Homo sapiens GN=PA2G4 PE=1 SV=1 - [F8VR77_HUMAN]	8.8	16	2	2	3					4.00927	8.8	2	3	284	31.4469	6.80029
E7EX73	Eukaryotic translation initiation factor 4 gamma 1 OS=Homo sapiens GN=EIF4G1 PE=1 SV=1 - [E7EX73_HUMAN]	8.77	31	8	9	12	2.4542	0.77	1	1	30.2614	8.01	8	11	1436	158.547	5.21143
P12270	Nucleoprotein TPR OS=Homo sapiens GN=TPR PE=1 SV=3 - [TPR_HUMAN]	8.76	11	13	13	15	18.7619	3.94	6	6	27.8589	6.6	9	9	2363	267.131	5.021
D3YWT1	Heterogeneous nuclear ribonucleoprotein H3 OS=Mus musculus GN=Hnrnph3 PE=1 SV=1 - [D3YWT1_MOUSE]	8.76	8	2	2	7	9.3129	8.76	2	3	15.0466	8.76	2	4	331	35.1594	6.87354
I7GL15	Macaca fascicularis brain cDNA clone: QflA-16566, similar to human RAD23 homolog B (S. cerevisiae) (RAD23B), mRNA, RefSeq: NM_002874.2 OS=Macaca fascicularis PE=2 SV=1 - [I7GL15_MACFA]	8.76	15	1	1	2	4.27842	8.76	1	1	2.89749	8.76	1	1	217	23.2625	4.67822
G1NUE2	Uncharacterized protein (Fragment) OS=Myotis lucifugus GN=KRT75 PE=3 SV=1 - [G1NUE2_MYOLU]	8.76	10	0	5	87	139.467	8.76	5	50	110.277	6.02	4	37	548	59.4949	8.29443
F5GXS8	Protein quaking (Fragment) OS=Homo sapiens GN=QKI PE=1 SV=1 - [F5GXS8_HUMAN]	8.75	14	1	1	1	2.00348	8.75	1	1					160	18.0044	8.07471
E0VJR8	Fibrillarin, putative OS=Pediculus humanus subsp. corporis GN=8238809 PE=3 SV=1 - [E0VJR8_PEDHC]	8.75	2	1	2	3	0	4.17	1	1	2.27031	8.75	2	2	240	26.307	9.21729
G1P5Y1	Mitogen-activated protein kinase (Fragment) OS=Myotis lucifugus PE=4 SV=1 - [G1P5Y1_MYOLU]	8.72	10	2	2	2					6.56583	8.72	2	2	321	37.4444	7.15186
W1MNC8	S-formylglutathione hydrolase OS=Pseudomonas aeruginosa VRFPA03 GN=M770_06675 PE=3 SV=1 - [W1MNC8_PSEAI]	8.7	1	1	1	1	2.03706	8.7	1	1					276	30.6532	6.13818
I7IFP8	HSPA1_8, heat shock 70kDa protein 1/8 OS=Babesia microti (strain RI) GN=BMR1_01G02545 PE=3 SV=1 - [I7IFP8_BABMR]	8.7	2	1	2	4		0			7.55382	8.7	2	4	644	70.1616	5.37646
A0A1R3EC10	DNA-binding response regulator OS=Vibrio lentus GN=BH583_13585 PE=4 SV=1 - [A0A1R3EC10_9VIBR]	8.68	1	1	1	1		0			2.23634	8.68	1	1	219	24.5141	5.36377
B7Z9L2	cDNA, FLJ78876, highly similar to NADH-ubiquinone oxidoreductase 49 kDa subunit, mitochondrial (EC 1.6.5.3) OS=Homo sapiens PE=2 SV=1 - [B7Z9L2_HUMAN]	8.66	9	2	2	2		0			4.047	8.66	2	2	231	26.9525	5.65576
A6R2L3	Uncharacterized protein OS=Ajellomyces capsulatus (strain NAm1 / WU24) GN=HCAG_03871 PE=4 SV=1 - [A6R2L3_AJECN]	8.61	12	1	1	1					2.75008	8.61	1	1	151	17.1471	9.71533
H0YF36	Nuclear pore complex protein Nup214 (Fragment) OS=Homo sapiens GN=NUP214 PE=1 SV=1 - [H0YF36_HUMAN]	8.57	7	1	1	1					2.33025	8.57	1	1	140	14.2234	9.87646
A0A1B8T8T3	Glutamine synthetase OS=Pseudomonas sp. AU12215 GN=A9513_011015 PE=3 SV=1 - [A0A1B8T8T3_9PSED]	8.53	7	2	2	2	0	5.12	1	1	0	3.41	1	1	469	51.9168	5.24951
Q5J8M4	Migration-inducing gene 14 OS=Homo sapiens PE=2 SV=1 - [Q5J8M4_HUMAN]	8.52	9	2	2	2		0			6.01651	8.52	2	2	352	39.4532	7.82568
D5V8D6	30S ribosomal protein S5 OS=Moraxella catarrhalis (strain BBH18) GN=rpsE PE=3 SV=1 - [D5V8D6_MORCB]	8.48	3	1	1	2	3.40967	8.48	1	1	3.88303	8.48	1	1	165	17.1711	9.87646
A0A1B8V934	50S ribosomal protein L20 OS=Pseudomonas sp. AU11447 GN=rplT PE=3 SV=1 - [A0A1B8V934_9PSED]	8.47	1	1	1	2	2.32086	8.47	1	1	2.30081	8.47	1	1	118	13.3567	11.7368
A0A0H3GZ96	50S ribosomal protein L6 OS=Klebsiella pneumoniae subsp. pneumoniae (strain HS11286) GN=rplF PE=3 SV=1 - [A0A0H3GZ96_KLEPH]	8.47	7	1	1	1	3.50408	8.47	1	1					177	18.8321	9.70068
A0A086BWT9	30S ribosomal protein S9 OS=Pseudomonas aeruginosa VRFPA01 GN=rpsI PE=3 SV=1 - [A0A086BWT9_PSEAI]	8.46	2	1	1	3	2.69315	8.46	1	1	4.81244	8.46	1	2	130	14.6159	11.2241
G1PP85	Uncharacterized protein OS=Myotis lucifugus GN=UBE2T PE=3 SV=1 - [G1PP85_MYOLU]	8.44	2	1	1	2	2.55612	8.44	1	1	2.64984	8.44	1	1	154	17.371	7.29834
F1QIZ5	Uncharacterized protein OS=Danio rerio PE=4 SV=2 - [F1QIZ5_DANRE]	8.44	3	1	2	2	2.82711	4.38	1	1	0	4.06	1	1	320	35.7271	8.22119
Q4ZG77	Putative uncharacterized protein PSMD14 (Fragment) OS=Homo sapiens GN=PSMD14 PE=4 SV=1 - [Q4ZG77_HUMAN]	8.44	21	1	1	2					6.05329	8.44	1	2	154	16.5213	5.23682
A0A0H3GWL9	50S ribosomal protein L2 OS=Klebsiella pneumoniae subsp. pneumoniae (strain HS11286) GN=rplB PE=3 SV=1 - [A0A0H3GWL9_KLEPH]	8.42	6	1	1	1	0	8.42	1	1					273	29.816	10.9312
Q543J5	Antithrombin OS=Mus musculus GN=Serpinc1 PE=1 SV=1 - [Q543J5_MOUSE]	8.39	8	2	2	2	0	6.02	1	1	2.23088	2.37	1	1	465	51.9706	6.45557
B4DFE6	cDNA FLJ59861, highly similar to ATP synthase gamma chain, mitochondrial (EC 3.6.3.14) OS=Homo sapiens PE=2 SV=1 - [B4DFE6_HUMAN]	8.39	6	1	1	4	3.09269	8.39	1	1	8.10239	8.39	1	3	143	15.7157	10.2866
B4DIJ9	cDNA FLJ55976, highly similar to Casein kinase I isoform delta (EC 2.7.11.1) OS=Homo sapiens PE=2 SV=1 - [B4DIJ9_HUMAN]	8.39	49	1	2	2	5.13025	8.39	2	2		0			298	34.4605	9.96436
P66610	30S ribosomal protein S7 OS=Helicobacter pylori (strain J99 / ATCC 700824) GN=rpsG PE=3 SV=1 - [RS7_HELPJ]	8.39	5	1	1	1					3.09712	8.39	1	1	155	17.9596	10.1694
Q8CB58	MCG13402, isoform CRA_d OS=Mus musculus GN=Ptbp1 PE=1 SV=1 - [Q8CB58_MOUSE]	8.38	14	2	2	3	3.26002	4.7	1	1	5.89906	8.38	2	2	489	52.5981	9.02686
H0W8H3	Uncharacterized protein OS=Cavia porcellus PE=3 SV=1 - [H0W8H3_CAVPO]	8.38	22	1	1	1					2.60502	8.38	1	1	167	19.6068	5.47803
D6RD63	COP9 signalosome complex subunit 4 (Fragment) OS=Homo sapiens GN=COPS4 PE=1 SV=1 - [D6RD63_HUMAN]	8.36	9	1	1	1	2.7835	8.36	1	1					275	31.4131	6.53662
S6AWD9	IgG H chain OS=Homo sapiens PE=2 SV=1 - [S6AWD9_HUMAN]	8.36	39	2	2	3	6.56234	8.36	2	2	2.69042	3.86	1	1	311	33.2815	7.85498
H2QET7	Uncharacterized protein OS=Pan troglodytes PE=4 SV=1 - [H2QET7_PANTR]	8.33	9	2	2	4	5.1256	8.33	2	2	4.97803	3.91	1	2	384	42.2714	6.52197
A0A0G2JI50	Negative elongation factor E (Fragment) OS=Homo sapiens GN=NELFE PE=1 SV=1 - [A0A0G2JI50_HUMAN]	8.33	9	1	1	1					2.18578	8.33	1	1	240	27.612	9.65674
W1MQF7	Ferritin OS=Pseudomonas aeruginosa VRFPA03 GN=M770_08575 PE=3 SV=1 - [W1MQF7_PSEAI]	8.33	1	1	1	1					4.03935	8.33	1	1	156	17.4819	5.04639
E0VVG8	WD-repeat protein, putative OS=Pediculus humanus subsp. corporis GN=8238556 PE=4 SV=1 - [E0VVG8_PEDHC]	8.31	9	2	2	4	3.07708	4.45	1	1	8.28033	8.31	2	3	337	37.8928	5.32568
Q96HX3	Dolichyl-diphosphooligosaccharide--protein glycosyltransferase subunit 1 (Fragment) OS=Homo sapiens PE=2 SV=1 - [Q96HX3_HUMAN]	8.27	12	3	3	5	12.8107	8.27	3	4	3.01926	2.64	1	1	568	64.5417	6.55127
A0A1D1UGF7	Uncharacterized protein OS=Ramazzottius varieornatus GN=RvY_00439-1 PE=4 SV=1 - [A0A1D1UGF7_RAMVA]	8.26	1	1	1	1					0	8.26	1	1	351	38.3442	9.86182
A0A0D9SFA8	Mitochondrial glutamate carrier 1 (Fragment) OS=Homo sapiens GN=SLC25A22 PE=1 SV=1 - [A0A0D9SFA8_HUMAN]	8.25	26	1	1	2	2.30025	8.25	1	1	2.51604	8.25	1	1	97	10.6256	9.45166
P05544	Serine protease inhibitor A3L OS=Rattus norvegicus GN=Serpina3l PE=1 SV=3 - [SPA3L_RAT]	8.23	1	2	2	2	5.68413	8.23	2	2		0			413	46.2481	5.66846
G1TXS0	U3 small nucleolar RNA-associated protein 11 OS=Oryctolagus cuniculus GN=UTP11 PE=3 SV=1 - [G1TXS0_RABIT]	8.23	7	2	2	2	2.20029	3.46	1	1	2.03256	4.76	1	1	231	28.0554	10.0815
A0A1B8VAP5	6,7-dimethyl-8-ribityllumazine synthase OS=Pseudomonas sp. AU11447 GN=ribH PE=3 SV=1 - [A0A1B8VAP5_9PSED]	8.23	1	1	1	1	2.9834	8.23	1	1					158	16.4858	5.94775
D1J876	50S ribosomal protein L14 OS=Mycoplasma hominis (strain ATCC 23114 / NBRC 14850 / NCTC 10111 / PG21) GN=rplN PE=3 SV=1 - [D1J876_MYCHP]	8.2	1	1	1	1	0	8.2	1	1		0			122	13.3043	9.99365
K9IS29	Putative dosage compensation complex subunit mle (Fragment) OS=Desmodus rotundus PE=2 SV=1 - [K9IS29_DESRO]	8.14	8	1	3	9	12.815	8.14	3	5	8.56492	6.04	2	4	381	38.6806	9.27588
Q9Z1R9	MCG124046 OS=Mus musculus GN=Prss1 PE=1 SV=1 - [Q9Z1R9_MOUSE]	8.13	1	1	1	2	2.2404	8.13	1	2					246	26.1178	4.94482
Q9QUK9	MCG15083 OS=Mus musculus GN=Try5 PE=1 SV=1 - [Q9QUK9_MOUSE]	8.13	2	1	1	19	22.6202	8.13	1	9	27.8818	8.13	1	10	246	26.2599	5.30029
C9JEL7	Protein arginine methyltransferase NDUFAF7, mitochondrial (Fragment) OS=Homo sapiens GN=NDUFAF7 PE=1 SV=1 - [C9JEL7_HUMAN]	8.11	9	1	1	1	2.02766	8.11	1	1					111	12.4114	7.34229
G1U843	Uncharacterized protein OS=Oryctolagus cuniculus GN=HOXB9 PE=4 SV=2 - [G1U843_RABIT]	8.1	6	2	2	5	8.4848	8.1	2	3	6.4594	5.26	1	2	247	27.7349	8.89502
Q08188	Protein-glutamine gamma-glutamyltransferase E OS=Homo sapiens GN=TGM3 PE=1 SV=4 - [TGM3_HUMAN]	8.08	4	3	3	8	14.0499	8.08	3	6	3.27162	5.48	2	2	693	76.5836	5.85889
A6ND22	28S ribosomal protein S16, mitochondrial OS=Homo sapiens GN=MRPS16 PE=1 SV=1 - [A6ND22_HUMAN]	8.08	5	1	1	1	2.11461	8.08	1	1					99	11.1429	9.68604
W9AH35	Gas vesicle protein G OS=Oceanobacillus picturae GN=BN988_03595 PE=4 SV=1 - [W9AH35_9BACI]	8.05	6	1	1	3	2.22903	8.05	1	1	2.37929	8.05	1	2	87	10.3283	4.58936
B1AUU8	Epidermal growth factor receptor substrate 15 OS=Homo sapiens GN=EPS15 PE=1 SV=1 - [B1AUU8_HUMAN]	8.01	11	2	3	3	10.0573	8.01	3	3					762	83.6028	4.70361
W1MV33	Membrane protein OS=Pseudomonas aeruginosa VRFPA03 GN=M770_02620 PE=4 SV=1 - [W1MV33_PSEAI]	8	3	2	2	3	5.0915	8	2	2	2.29147	2.75	1	1	400	44.0181	5.24951
H0VT29	Isocitrate dehydrogenase [NAD] subunit, mitochondrial OS=Cavia porcellus GN=IDH3B PE=3 SV=1 - [H0VT29_CAVPO]	8	13	3	3	3	5.02646	4.8	2	2	2.78651	3.2	1	1	375	41.2061	8.08936
A0A0H3GU54	Succinate dehydrogenase flavoprotein subunit OS=Klebsiella pneumoniae subsp. pneumoniae (strain HS11286) GN=KPHS_15660 PE=3 SV=1 - [A0A0H3GU54_KLEPH]	8	24	3	3	4	9.86768	8	3	3	3.57508	2.55	1	1	550	60.6141	6.15088
G1SZ91	Uncharacterized protein OS=Oryctolagus cuniculus GN=FABP5 PE=3 SV=2 - [G1SZ91_RABIT]	7.96	3	1	1	2	4.05578	7.96	1	2					113	12.6462	6.53662
B4DGW8	cDNA FLJ60505, highly similar to Apolipoprotein B mRNA-editing enzyme catalytic polypeptide-like 3F OS=Homo sapiens PE=2 SV=1 - [B4DGW8_HUMAN]	7.94	9	1	1	1	2.15524	7.94	1	1					189	22.9052	8.5874
G7YAM8	Adenylate kinase OS=Clonorchis sinensis GN=CLF_103924 PE=4 SV=1 - [G7YAM8_CLOSI]	7.87	1	1	1	1					2.48556	7.87	1	1	254	28.4917	5.69385
B2MV14	Truncated lactoferrin OS=Homo sapiens GN=LTF PE=3 SV=1 - [B2MV14_HUMAN]	7.86	20	3	4	7	9.03781	5.64	3	4	6.83466	3.76	2	3	585	64.1928	8.07471
G1TM49	Uncharacterized protein OS=Oryctolagus cuniculus GN=TET1 PE=4 SV=1 - [G1TM49_RABIT]	7.83	17	6	6	6	19.406	7.83	6	6					1137	130.671	6.25244
P14174	Macrophage migration inhibitory factor OS=Homo sapiens GN=MIF PE=1 SV=4 - [MIF_HUMAN]	7.83	1	1	1	2					4.92309	7.83	1	2	115	12.4682	7.88428
G3V1X1	Proline/serine-rich coiled-coil 2, isoform CRA_a OS=Homo sapiens GN=ZFC3H1 PE=1 SV=1 - [G3V1X1_HUMAN]	7.82	7	2	2	3	5.63568	7.82	2	2	3.15552	3.07	1	1	358	39.1096	9.80322
A0A087WUX6	Proteasomal ubiquitin receptor ADRM1 (Fragment) OS=Homo sapiens GN=ADRM1 PE=1 SV=1 - [A0A087WUX6_HUMAN]	7.8	6	1	1	1	2.64023	7.8	1	1		0			141	14.9364	6.52197
A0A1B8VDW6	Paraslipin OS=Pseudomonas sp. AU11447 GN=A6723_003855 PE=4 SV=1 - [A0A1B8VDW6_9PSED]	7.79	1	1	1	1	2.24069	7.79	1	1		0			308	33.5017	5.23682
Q86YM6	HOMER1F OS=Homo sapiens GN=HOMER1 PE=1 SV=1 - [Q86YM6_HUMAN]	7.78	8	1	1	1	1.93311	7.78	1	1					180	20.8068	5.0083
H2RBH1	Uncharacterized protein OS=Pan troglodytes GN=PRRC2C PE=4 SV=1 - [H2RBH1_PANTR]	7.78	17	11	13	27	22.5055	3.91	6	7	54.8469	6.46	11	20	2816	308.272	9.0415
Q53YM3	E2F transcription factor 6, isoform CRA_d OS=Homo sapiens GN=E2F6 PE=2 SV=1 - [Q53YM3_HUMAN]	7.77	6	1	1	1	0	7.77	1	1					206	22.9676	4.75439
G1STH4	Uncharacterized protein OS=Oryctolagus cuniculus GN=GNA13 PE=4 SV=2 - [G1STH4_RABIT]	7.76	81	1	2	8	8.36696	3.28	1	3	12.4978	7.76	2	5	335	38.9763	8.29443
M0QY96	Heterogeneous nuclear ribonucleoprotein M (Fragment) OS=Homo sapiens GN=HNRNPM PE=1 SV=1 - [M0QY96_HUMAN]	7.76	21	1	1	1					0	7.76	1	1	116	12.4449	9.01221
B7Z8S9	cDNA FLJ61036, highly similar to Homo sapiens RNA (guanine-7-) methyltransferase (RNMT), mRNA OS=Homo sapiens PE=2 SV=1 - [B7Z8S9_HUMAN]	7.75	9	1	1	2	2.37238	7.75	1	1	2.2885	7.75	1	1	129	14.9634	7.85498
A0A1V2GFI6	Acetyltransferase component of pyruvate dehydrogenase complex (Fragment) OS=Escherichia coli GN=BXT93_12595 PE=3 SV=1 - [A0A1V2GFI6_ECOLX]	7.69	12	2	2	2	6.13605	7.69	2	2					390	41.8403	9.23193
A0A1X8WVE9	Molecular chaperone HtpG OS=Escherichia coli GN=ACN87_28925 PE=4 SV=1 - [A0A1X8WVE9_ECOLX]	7.69	20	3	3	3	3.68038	3.37	1	1	4.67409	4.33	2	2	624	71.4103	5.21143
H0W2Q0	Uncharacterized protein OS=Cavia porcellus GN=ANP32B PE=4 SV=1 - [H0W2Q0_CAVPO]	7.69	9	1	1	1					2.829	7.69	1	1	169	19.1357	4.4751
F1Q898	LSM family member 14B OS=Danio rerio GN=lsm14b PE=1 SV=1 - [F1Q898_DANRE]	7.63	1	1	2	7	6.52165	7.63	2	3	8.18026	7.63	2	4	380	41.515	9.49561
Q8TAT6	Nuclear protein localization protein 4 homolog OS=Homo sapiens GN=NPLOC4 PE=1 SV=3 - [NPL4_HUMAN]	7.57	9	3	3	3					9.05344	7.57	3	3	608	68.0769	6.37939
H2R3G8	Uncharacterized protein OS=Pan troglodytes GN=ACADSB PE=3 SV=1 - [H2R3G8_PANTR]	7.56	4	2	2	2	2.03055	3.2	1	1	2.77934	4.36	1	1	344	37.6733	6.72705
G3V595	Alpha-1-antichymotrypsin (Fragment) OS=Homo sapiens GN=SERPINA3 PE=1 SV=3 - [G3V595_HUMAN]	7.54	4	1	1	2	0	7.54	1	1	0	7.54	1	1	305	34.6036	5.41455
A0A0C4DGK8	DNA-(apurinic or apyrimidinic site) lyase (Fragment) OS=Homo sapiens GN=APEX1 PE=1 SV=1 - [A0A0C4DGK8_HUMAN]	7.53	16	1	1	1					1.79931	7.53	1	1	146	15.9281	7.73779
G1T9V1	Uncharacterized protein OS=Oryctolagus cuniculus GN=PDHB PE=4 SV=2 - [G1T9V1_RABIT]	7.52	14	2	2	3	1.69463	3.06	1	1	5.02197	7.52	2	2	359	39.0711	6.87354
A0A0C4DFX0	Nucleolar protein 6 OS=Homo sapiens GN=NOL6 PE=1 SV=1 - [A0A0C4DFX0_HUMAN]	7.5	6	1	1	2	2.87879	7.5	1	1	2.82807	7.5	1	1	200	22.1895	6.32861
A0A1U9X8Y4	Chloride intracellular channel protein OS=Homo sapiens PE=3 SV=1 - [A0A1U9X8Y4_HUMAN]	7.5	5	1	1	1					3.90331	7.5	1	1	240	26.7767	5.26221
K1U1P2	DNA polymerase III, epsilon subunit (Fragment) OS=human gut metagenome GN=OBE_02975 PE=4 SV=1 - [K1U1P2_9ZZZZ]	7.48	1	1	1	1					2.03179	7.48	1	1	107	12.8956	6.31592
G1TKY6	Uncharacterized protein OS=Oryctolagus cuniculus GN=PPP1R35 PE=4 SV=1 - [G1TKY6_RABIT]	7.47	3	1	1	1	3.45682	7.47	1	1					241	26.2089	8.33838
E9QDW8	STIP1 homology and U-Box-containing protein 1 (Fragment) OS=Danio rerio GN=stub1 PE=1 SV=1 - [E9QDW8_DANRE]	7.45	9	1	1	2	2.23767	7.45	1	1	2.38066	7.45	1	1	161	18.5715	8.60205
A0A0M3HER2	Centromere protein V OS=Homo sapiens GN=CENPV PE=1 SV=1 - [A0A0M3HER2_HUMAN]	7.43	3	1	1	1					2.8346	7.43	1	1	175	18.7957	10.0522
F8VNX8	TRAF-type zinc finger domain-containing protein 1 (Fragment) OS=Homo sapiens GN=TRAFD1 PE=1 SV=1 - [F8VNX8_HUMAN]	7.42	3	1	1	1	3.45207	7.42	1	1					283	32.4227	5.68115
Q4R8F1	Testis cDNA clone: QtsA-12584, similar to human PEF protein with a long N-terminal hydrophobic domain(peflin) (PEF) OS=Macaca fascicularis PE=2 SV=1 - [Q4R8F1_MACFA]	7.38	4	1	1	1					2.64094	7.38	1	1	149	17.4055	8.14795
Q4LDX3	Tyrosine-protein kinase OS=Homo sapiens GN=JAK1 PE=2 SV=1 - [Q4LDX3_HUMAN]	7.36	13	5	5	7	22.1513	7.36	5	7		0			1141	131.606	7.60596
W2SP07	Muscarinic acetylcholine receptor gar-3 family protein OS=Necator americanus GN=NECAME_14758 PE=3 SV=1 - [W2SP07_NECAM]	7.36	1	1	1	1					2.63085	7.36	1	1	516	59.1472	9.77393
B4E001	cDNA FLJ52817, highly similar to Exosome complex exonuclease RRP4 (EC 3.1.13.-) OS=Homo sapiens PE=2 SV=1 - [B4E001_HUMAN]	7.33	9	1	1	1	2.46796	7.33	1	1					150	16.7428	9.0708
H2PZ32	Mitochondrial ribosomal protein L37 OS=Pan troglodytes GN=MRPL37 PE=2 SV=1 - [H2PZ32_PANTR]	7.33	7	2	2	3	3.5112	3.78	1	1	6.38917	7.33	2	2	423	48.0952	8.646
K9ISE7	Putative regulator of the ubiquitin pathway (Fragment) OS=Desmodus rotundus PE=2 SV=1 - [K9ISE7_DESRO]	7.28	7	2	2	9	10.8174	4.46	1	3	12.3006	7.28	2	6	426	50.3875	5.93506
G0ZRK3	Cell division protein (Fragment) OS=Bartonella bacilliformis GN=ftsZ PE=4 SV=1 - [G0ZRK3_BARBA]	7.27	2	1	1	1	0	7.27	1	1		0			165	18.5343	7.13721
Q5STV6	NF-kappa-B inhibitor-like protein 1 OS=Homo sapiens GN=NFKBIL1 PE=1 SV=2 - [Q5STV6_HUMAN]	7.26	13	2	2	2	4.01712	7.26	2	2		0			358	40.8024	7.86963
H2R0Q6	Sodium/potassium-transporting ATPase subunit alpha OS=Pan troglodytes GN=ATP1A1 PE=3 SV=1 - [H2R0Q6_PANTR]	7.26	51	5	5	11	16.4999	7.26	5	5	18.8984	5.59	4	6	1019	112.479	5.49072
H0V867	Glutathione peroxidase OS=Cavia porcellus GN=GPX3 PE=3 SV=1 - [H0V867_CAVPO]	7.25	1	1	1	1		0			2.45476	7.25	1	1	193	21.906	7.29834
H2PYI2	Uncharacterized protein OS=Pan troglodytes GN=MECR PE=4 SV=1 - [H2PYI2_PANTR]	7.24	4	2	2	4	9.18535	7.24	2	3	2.31253	3.49	1	1	373	40.302	8.90967
H0WC22	Uncharacterized protein OS=Cavia porcellus GN=HNRNPA0 PE=4 SV=1 - [H0WC22_CAVPO]	7.21	7	1	1	1		0			4.14843	7.21	1	1	222	23.6347	7.56201
A0A086BW60	Uncharacterized protein OS=Pseudomonas aeruginosa VRFPA01 GN=G039_0319305 PE=4 SV=1 - [A0A086BW60_PSEAI]	7.19	2	1	1	1					1.9631	7.19	1	1	167	18.4799	9.56885
A0A093DG60	Amino acid dehydrogenase OS=Escherichia coli GN=ykgF PE=4 SV=1 - [A0A093DG60_ECOLX]	7.16	12	2	2	8	10.0802	7.16	2	5	3.35994	7.16	2	3	475	52.971	8.47021
H2R1M7	Mediator of DNA damage checkpoint protein 1 OS=Pan troglodytes GN=MDC1 PE=4 SV=1 - [H2R1M7_PANTR]	7.14	15	6	6	7		0			20.7434	7.14	6	7	1905	205.955	5.46533
G1TKX3	Uncharacterized protein OS=Oryctolagus cuniculus GN=FGG PE=4 SV=1 - [G1TKX3_RABIT]	7.09	9	1	2	13	27.7632	7.09	2	6	33.5926	7.09	2	7	437	49.4109	6.0874
A0A1B2R8D4	Elongation factor Tu OS=Bordetella sp. H567 GN=tuf PE=3 SV=1 - [A0A1B2R8D4_9BORD]	7.07	2	2	2	2					5.09486	7.07	2	2	396	43.0153	5.63037
P00711	Alpha-lactalbumin OS=Bos taurus GN=LALBA PE=1 SV=2 - [LALBA_BOVIN]	7.04	1	1	1	1	0	7.04	1	1		0			142	16.2359	5.13525
Q5SZE2	Ceramide synthase 2 (Fragment) OS=Homo sapiens GN=CERS2 PE=1 SV=8 - [Q5SZE2_HUMAN]	7.03	8	1	1	1	2.12395	7.03	1	1					128	15.3102	9.68604
G1QCW0	Uncharacterized protein (Fragment) OS=Myotis lucifugus PE=4 SV=1 - [G1QCW0_MYOLU]	7.01	1	1	1	5	7.88099	7.01	1	3	5.4245	7.01	1	2	157	17.2173	8.06006
B7Z553	cDNA FLJ51266, highly similar to Vitronectin OS=Homo sapiens PE=2 SV=1 - [B7Z553_HUMAN]	7.01	4	1	1	1					3.52269	7.01	1	1	214	23.5904	4.64014
Q8J796	Pol polyprotein (Fragment) OS=Human immunodeficiency virus 1 GN=pol PE=3 SV=1 - [Q8J796_9HIV1]	6.99	1	1	1	1	2.03258	6.99	1	1					329	37.3358	9.0708
A0A1V2G9I6	tRNA (Guanosine(46)-N7)-methyltransferase TrmB (Fragment) OS=Escherichia coli GN=BXT93_22130 PE=4 SV=1 - [A0A1V2G9I6_ECOLX]	6.96	3	1	1	1	2.29379	6.96	1	1					158	18.0981	7.32764
B2RDK6	cDNA, FLJ96656, highly similar to Homo sapiens SPFH domain family, member 1 (SPFH1), mRNA OS=Homo sapiens PE=2 SV=1 - [B2RDK6_HUMAN]	6.94	7	2	2	2	3.9568	6.94	2	2		0			346	38.8873	7.86963
A0A094VM44	3-dehydroquinate synthase OS=Escherichia coli GN=aroB PE=3 SV=1 - [A0A094VM44_ECOLX]	6.91	5	1	1	59	34.6835	6.91	1	13	94.5276	6.91	1	46	362	38.8563	6.04932
A0A0A1AFC0	Aspartate kinase OS=Escherichia coli GN=metL PE=4 SV=1 - [A0A0A1AFC0_ECOLX]	6.91	21	4	4	5		0			13.6579	6.91	4	5	810	88.8627	5.59229
H2QT32	Mitochondrial ribosomal protein L14 OS=Pan troglodytes GN=MRPL14 PE=2 SV=1 - [H2QT32_PANTR]	6.9	4	1	1	1		0			2.04713	6.9	1	1	145	15.9284	10.3745
A0A081UQ97	Succinate--CoA ligase [ADP-forming] subunit alpha OS=Aeromonas hydrophila GN=sucD PE=3 SV=1 - [A0A081UQ97_AERHY]	6.9	1	1	1	4	4.84982	6.9	1	1	11.2164	6.9	1	3	290	29.8114	6.06201
G1PF55	Uncharacterized protein OS=Myotis lucifugus GN=KRT7 PE=3 SV=1 - [G1PF55_MYOLU]	6.87	48	0	3	145	174.791	6.87	3	70	198.913	6.87	3	75	466	51.8073	6.12549
A8K3Y5	cDNA FLJ78186 OS=Homo sapiens PE=2 SV=1 - [A8K3Y5_HUMAN]	6.86	6	2	2	2					6.09909	6.86	2	2	379	43.5959	9.56885
I3L4M2	Protein disulfide-isomerase (Fragment) OS=Homo sapiens GN=P4HB PE=1 SV=1 - [I3L4M2_HUMAN]	6.84	15	1	1	1	1.8506	6.84	1	1					117	13.482	5.5415
A0A0H2YXR4	Bifunctional protein PutA OS=Escherichia coli O1:K1 / APEC GN=putA PE=3 SV=1 - [A0A0H2YXR4_ECOK1]	6.82	21	5	5	5	9.6502	4.92	3	3	5.35042	1.89	2	2	1320	143.754	5.84619
B3KM97	cDNA FLJ10554 fis, clone NT2RP2002385, highly similar to Synaptic glycoprotein SC2 OS=Homo sapiens PE=2 SV=1 - [B3KM97_HUMAN]	6.82	20	2	2	4	2.46395	2.92	1	1	4.84475	6.82	2	3	308	36.0298	9.49561
C9JH92	Quinone oxidoreductase (Fragment) OS=Homo sapiens GN=CRYZ PE=1 SV=1 - [C9JH92_HUMAN]	6.8	5	1	1	1					0	6.8	1	1	206	21.9185	8.76318
Q5VSP4	Putative lipocalin 1-like protein 1 OS=Homo sapiens GN=LCN1P1 PE=5 SV=1 - [LC1L1_HUMAN]	6.79	3	1	1	1	2.98704	6.79	1	1					162	17.907	4.99561
A0A1B8V7A7	Transcriptional regulator CysB OS=Pseudomonas sp. AU11447 GN=A6723_012390 PE=4 SV=1 - [A0A1B8V7A7_9PSED]	6.79	2	2	2	3	5.408	6.79	2	2	2.6821	3.09	1	1	324	36.0468	6.90283
B4E395	cDNA FLJ54252, highly similar to Argininosuccinate synthase (EC 6.3.4.5) OS=Homo sapiens PE=2 SV=1 - [B4E395_HUMAN]	6.78	5	1	1	1	4.73557	6.78	1	1					295	32.7577	8.74854
A0A0M3KL48	Fab4201 heavy chain OS=Mus musculus PE=1 SV=1 - [A0A0M3KL48_MOUSE]	6.78	1	1	1	2	3.58182	6.78	1	1	3.64907	6.78	1	1	236	25.2595	8.55811
Q15795	Sec7p-like protein (Fragment) OS=Homo sapiens PE=2 SV=1 - [Q15795_HUMAN]	6.77	64	2	2	2	0	4.14	1	1	1.68354	2.63	1	1	266	30.9727	6.39209
A0A1B8V8C0	Amino acid ABC transporter substrate-binding protein OS=Pseudomonas sp. AU11447 GN=A6723_021185 PE=3 SV=1 - [A0A1B8V8C0_9PSED]	6.73	2	2	2	3	5.87279	6.73	2	2	2.68285	3.22	1	1	342	36.9758	5.92236
Q4L6S3	UPF0365 protein SH1343 OS=Staphylococcus haemolyticus (strain JCSC1435) GN=SH1343 PE=3 SV=1 - [Y1343_STAHJ]	6.71	3	1	1	1	0	6.71	1	1		0			328	35.0087	6.01123
B4DIU0	cDNA FLJ58391, highly similar to Exosome complex exonuclease RRP42 (EC 3.1.13.-) OS=Homo sapiens PE=2 SV=1 - [B4DIU0_HUMAN]	6.71	8	1	1	1	2.39408	6.71	1	1		0			164	17.9139	4.83057
A0A0S2Z4X1	RNA binding motif protein 10 isoform 1 (Fragment) OS=Homo sapiens GN=RBM10 PE=2 SV=1 - [A0A0S2Z4X1_HUMAN]	6.69	11	4	4	4	11.546	6.69	4	4					852	94.3122	6.72705
H2QER4	Uncharacterized protein OS=Pan troglodytes PE=4 SV=1 - [H2QER4_PANTR]	6.69	2	1	1	1					0	6.69	1	1	299	33.4738	6.65381
K7EKE5	Tubulin gamma-1 chain OS=Homo sapiens GN=TUBG1 PE=4 SV=1 - [K7EKE5_HUMAN]	6.67	17	1	1	1					2.29408	6.67	1	1	135	15.1633	4.51318
Q567R9	CIP29 protein OS=Homo sapiens GN=CIP29 PE=2 SV=1 - [Q567R9_HUMAN]	6.67	11	1	1	1					1.73747	6.67	1	1	150	16.82	9.70068
A0A086C279	50S ribosomal protein L10 OS=Pseudomonas aeruginosa VRFPA01 GN=rplJ PE=3 SV=1 - [A0A086C279_PSEAI]	6.63	1	1	1	5	6.87199	6.63	1	3	6.41475	6.63	1	2	166	17.6234	8.89502
B3KRM8	Translin, isoform CRA_b OS=Homo sapiens GN=TSN PE=2 SV=1 - [B3KRM8_HUMAN]	6.63	9	1	1	1	1.79312	6.63	1	1					181	20.938	8.00146
A0A0J9YX88	PHD and RING finger domain-containing protein 1 OS=Homo sapiens GN=PHRF1 PE=1 SV=1 - [A0A0J9YX88_HUMAN]	6.63	9	5	5	8	20.9306	6.63	5	6	6.29337	2.88	2	2	1494	161.814	9.0708
H2QNX4	Replication factor C (Activator 1) 4, 37kDa OS=Pan troglodytes GN=RFC4 PE=2 SV=1 - [H2QNX4_PANTR]	6.61	4	2	2	2					4.65291	6.61	2	2	363	39.6569	8.01611
U4VA67	Iron ABC transporter substrate-binding protein OS=Ochrobactrum intermedium 229E GN=Q644_09975 PE=3 SV=1 - [U4VA67_9RHIZ]	6.6	5	1	1	2	3.42725	6.6	1	1	3.44545	6.6	1	1	288	31.2172	8.17725
C7BJY6	4-hydroxy-tetrahydrodipicolinate reductase OS=Photorhabdus asymbiotica subsp. asymbiotica (strain ATCC 43949 / 3105-77) GN=dapB PE=3 SV=1 - [C7BJY6_PHOAA]	6.59	1	1	1	1					3.06006	6.59	1	1	273	28.939	6.07471
G1SN21	Purine nucleoside phosphorylase OS=Oryctolagus cuniculus GN=PNP PE=3 SV=1 - [G1SN21_RABIT]	6.57	11	2	2	2					2.27584	6.57	2	2	289	32.1143	6.87354
C4JEW4	Uncharacterized protein OS=Uncinocarpus reesii (strain UAMH 1704) GN=UREG_00864 PE=4 SV=1 - [C4JEW4_UNCRE]	6.54	1	1	1	2	2.20252	6.54	1	1	2.49616	6.54	1	1	260	29.0154	7.78174
E7ET15	U2 snRNP-associated SURP motif-containing protein OS=Homo sapiens GN=U2SURP PE=1 SV=1 - [E7ET15_HUMAN]	6.52	12	4	4	4	12.0017	6.52	4	4		0			1028	118.175	8.54346
W1MPL7	S-(hydroxymethyl)glutathione dehydrogenase OS=Pseudomonas aeruginosa VRFPA03 GN=M770_06660 PE=3 SV=1 - [W1MPL7_PSEAI]	6.5	1	1	1	1	3.48765	6.5	1	1					369	39.0287	6.34131
A0A1B8VFF4	Uncharacterized protein OS=Pseudomonas sp. AU11447 GN=A6723_008625 PE=4 SV=1 - [A0A1B8VFF4_9PSED]	6.5	3	2	2	4	6.30808	6.5	2	2	5.93128	6.5	2	2	354	39.0779	5.8335
E9PI77	Baculoviral IAP repeat-containing protein 2 (Fragment) OS=Homo sapiens GN=BIRC2 PE=1 SV=1 - [E9PI77_HUMAN]	6.47	12	1	1	2	1.98128	6.47	1	1	1.84952	6.47	1	1	139	15.8043	7.57666
G1SCV9	Uncharacterized protein OS=Oryctolagus cuniculus GN=AASDHPPT PE=4 SV=1 - [G1SCV9_RABIT]	6.47	7	2	2	4	2.10605	2.59	1	1	6.88809	6.47	2	3	309	35.6622	6.7124
G1NZQ2	Uncharacterized protein OS=Myotis lucifugus GN=STK38L PE=3 SV=1 - [G1NZQ2_MYOLU]	6.47	12	2	2	2	5.22108	6.47	2	2					464	53.7644	7.13721
Q9BT22	Chitobiosyldiphosphodolichol beta-mannosyltransferase OS=Homo sapiens GN=ALG1 PE=1 SV=2 - [ALG1_HUMAN]	6.47	6	2	2	2					7.08921	6.47	2	2	464	52.4839	7.2251
Q6PGR1	AMFR protein (Fragment) OS=Homo sapiens GN=AMFR PE=2 SV=1 - [Q6PGR1_HUMAN]	6.44	11	1	1	1	3.43371	6.44	1	1					202	22.8035	4.98291
H2QEE5	Uncharacterized protein OS=Pan troglodytes GN=DSG2 PE=4 SV=1 - [H2QEE5_PANTR]	6.44	3	4	4	4	4.82101	1.61	1	1	8.66922	4.83	3	3	1118	122.484	5.22412
J3QT61	GTPase Era, mitochondrial OS=Homo sapiens GN=ERAL1 PE=1 SV=1 - [J3QT61_HUMAN]	6.43	8	1	1	1					2.02364	6.43	1	1	171	18.4006	10.5063
G4LXF8	26 Kd glutathione-S-transferase, Sm26, putative OS=Schistosoma mansoni GN=Smp_163610 PE=3 SV=1 - [G4LXF8_SCHMA]	6.42	1	1	1	1					3.12747	6.42	1	1	218	25.3509	6.3667
I7G7W8	Macaca fascicularis brain cDNA clone: QflA-23785, similar to human mitochondrial ribosomal protein S6 (MRPS6), nucleargene encoding mitochondrial protein, mRNA, RefSeq: NM_032476.2 OS=Macaca fascicularis PE=2 SV=1 - [I7G7W8_MACFA]	6.4	4	1	1	1	0	6.4	1	1					125	14.3026	9.01221
H0Y4R1	Inosine-5'-monophosphate dehydrogenase 2 (Fragment) OS=Homo sapiens GN=IMPDH2 PE=1 SV=1 - [H0Y4R1_HUMAN]	6.38	16	2	2	3	7.25108	6.38	2	2	3.18826	2.34	1	1	470	51.0352	8.17725
W2SWB3	Kunitz/Bovine pancreatic trypsin inhibitor domain protein OS=Necator americanus GN=NECAME_13233 PE=4 SV=1 - [W2SWB3_NECAM]	6.36	1	1	1	1	0	6.36	1	1					110	12.1341	8.51416
A0A0C2FW75	Tubulin beta chain OS=Sporothrix brasiliensis 5110 GN=SPBR_03922 PE=3 SV=1 - [A0A0C2FW75_9PEZI]	6.36	41	1	2	3					7.65564	6.36	2	3	440	49.1526	4.83057
B4DVI2	cDNA FLJ55415, highly similar to Gamma-glutamyl hydrolase (EC 3.4.19.9) OS=Homo sapiens PE=2 SV=1 - [B4DVI2_HUMAN]	6.34	4	1	1	2	2.34082	6.34	1	1	0	6.34	1	1	205	22.6377	7.69385
A0A024R4H5	DNAation factor, 45kDa, alpha polypeptide, isoform CRA_b OS=Homo sapiens GN=DFFA PE=4 SV=1 - [A0A024R4H5_HUMAN]	6.34	4	1	1	1					2.82962	6.34	1	1	268	29.3927	4.61475
E2QHG9	Alkyl hydroperoxide reductase OS=Escherichia coli GN=ahpF PE=3 SV=1 - [E2QHG9_ECOLX]	6.33	9	2	2	2	6.03832	6.33	2	2					521	56.1421	5.68115
H0VSD7	Uncharacterized protein OS=Cavia porcellus GN=Sfpq PE=4 SV=1 - [H0VSD7_CAVPO]	6.33	7	2	2	2	2.94045	3.85	1	1	2.0394	2.49	1	1	442	50.3978	6.75635
G8USG4	Elongation factor Tu OS=Legionella pneumophila subsp. pneumophila ATCC 43290 GN=tuf PE=3 SV=1 - [G8USG4_LEGPN]	6.31	3	1	2	4	2.41341	6.31	2	2	3.81272	2.53	1	2	396	43.1521	5.37646
W1MP57	Ornithine decarboxylase OS=Pseudomonas aeruginosa VRFPA03 GN=M770_04995 PE=3 SV=1 - [W1MP57_PSEAI]	6.31	2	1	1	1	2.28007	6.31	1	1		0			301	33.6453	5.26221
A0A023LI45	tRNA pseudouridine synthase D OS=Escherichia coli GN=truD PE=3 SV=1 - [A0A023LI45_ECOLX]	6.3	5	1	1	2	3.9507	6.3	1	1	3.13107	6.3	1	1	349	39.0522	6.56592
K9IRV7	Putative actin-related protein arp2/3 complex subunit (Fragment) OS=Desmodus rotundus PE=2 SV=1 - [K9IRV7_DESRO]	6.3	11	1	2	3	4.99781	6.3	2	2	2.65364	3.44	1	1	349	38.9944	8.06006
A0A0A8U6M2	Site-determining protein OS=Escherichia coli O26:H11 GN=minD PE=3 SV=1 - [A0A0A8U6M2_ECOLX]	6.3	6	1	1	1	3.89967	6.3	1	1					270	29.5816	5.37646
H3BPM0	S phase cyclin A-associated protein in the endoplasmic reticulum (Fragment) OS=Homo sapiens GN=SCAPER PE=1 SV=1 - [H3BPM0_HUMAN]	6.29	15	4	4	4					12.289	6.29	4	4	747	85.1519	6.53662
A0A1W2PQ78	Hydroxyacyl-coenzyme A dehydrogenase, mitochondrial OS=Homo sapiens GN=HADH PE=1 SV=1 - [A0A1W2PQ78_HUMAN]	6.25	12	1	1	2	1.62441	6.25	1	1	0	6.25	1	1	176	19.2569	9.0415
A0A1B8VF51	Protein HflC OS=Pseudomonas sp. AU11447 GN=A6723_008140 PE=3 SV=1 - [A0A1B8VF51_9PSED]	6.23	1	2	2	3	2.27755	2.77	1	1	4.60679	6.23	2	2	289	32.8552	9.39307
S4R398	Transportin-1 (Fragment) OS=Homo sapiens GN=TNPO1 PE=1 SV=1 - [S4R398_HUMAN]	6.22	5	1	1	1	2.7367	6.22	1	1					193	22.056	5.89697
A0A086C281	DNA-directed RNA polymerase subunit beta' OS=Pseudomonas aeruginosa VRFPA01 GN=rpoC PE=3 SV=1 - [A0A086C281_PSEAI]	6.22	125	6	6	10	11.7924	3.36	3	5	13.1437	5.22	5	5	1399	154.273	7.09326
Q98654	Envelope protein OS=RD114 retrovirus GN=env PE=4 SV=1 - [Q98654_9GAMR]	6.21	1	1	1	2	2.69399	6.21	1	1	3.33509	6.21	1	1	564	61.9848	7.79639
H3BV04	Secretory carrier-associated membrane protein (Fragment) OS=Homo sapiens GN=SCAMP2 PE=1 SV=1 - [H3BV04_HUMAN]	6.19	11	1	1	1					2.37526	6.19	1	1	194	21.9699	5.93506
A8K9U1	cDNA FLJ76468, highly similar to Homo sapiens cullin 7 (CUL7), mRNA OS=Homo sapiens PE=2 SV=1 - [A8K9U1_HUMAN]	6.18	10	8	8	11	24.5955	5.48	7	8	11.1371	2.71	3	3	1698	191.039	5.96045
H7C2D1	Vigilin (Fragment) OS=Homo sapiens GN=HDLBP PE=1 SV=1 - [H7C2D1_HUMAN]	6.17	12	1	1	1					2.36156	6.17	1	1	308	34.3021	8.5874
G1P1X6	Uncharacterized protein OS=Myotis lucifugus GN=KRT79 PE=3 SV=1 - [G1P1X6_MYOLU]	6.16	1	1	4	27	46.6771	4.29	3	15	31.7492	4.1	3	12	536	58.0513	7.78174
Q9BXW4	Microtubule-associated proteins 1A/1B light chain 3C OS=Homo sapiens GN=MAP1LC3C PE=1 SV=1 - [MLP3C_HUMAN]	6.12	1	1	1	1	1.86242	6.12	1	1					147	16.8407	9.05615
B9KDE1	Ribosomal protein L11 methyltransferase OS=Campylobacter lari (strain RM2100 / D67 / ATCC BAA-1060) GN=prmA PE=3 SV=1 - [PRMA_CAMLR]	6.12	1	1	1	4		0			12.5914	6.12	1	4	278	32.0508	6.3667
B4DL90	Chromosome 22 open reading frame 13, isoform CRA_c OS=Homo sapiens GN=C22orf13 PE=2 SV=1 - [B4DL90_HUMAN]	6.12	12	1	1	1	3.10137	6.12	1	1		0			196	22.671	6.90283
O93309	Structural maintenance of chromosomes protein 3 OS=Xenopus laevis GN=smc3 PE=1 SV=2 - [SMC3_XENLA]	6.12	8	6	6	6					14.6855	6.12	6	6	1209	140.636	7.44482
B4DZX7	Thioredoxin domain containing, isoform CRA_b OS=Homo sapiens GN=TXNDC PE=2 SV=1 - [B4DZX7_HUMAN]	6.12	3	1	1	1					0	6.12	1	1	196	22.3751	5.70654
B4E266	cDNA FLJ58466, highly similar to Leucyl-tRNA synthetase, cytoplasmic (EC 6.1.1.4) OS=Homo sapiens PE=2 SV=1 - [B4E266_HUMAN]	6.11	17	5	5	6	4.74899	2.57	2	2	10.9621	5.31	4	4	1130	129.105	7.78174
H0WBQ6	Uncharacterized protein OS=Cavia porcellus GN=HIST1H1C PE=3 SV=1 - [H0WBQ6_CAVPO]	6.1	4	1	1	1		0			2.45439	6.1	1	1	213	21.4007	11.0044
G1SGH0	Uncharacterized protein OS=Oryctolagus cuniculus GN=LOC100339859 PE=3 SV=1 - [G1SGH0_RABIT]	6.1	1	1	1	1					2.08412	6.1	1	1	246	26.3208	5.03369
J3QLN8	Aurora kinase B (Fragment) OS=Homo sapiens GN=AURKB PE=1 SV=8 - [J3QLN8_HUMAN]	6.09	9	1	1	1	2.27513	6.09	1	1					230	26.6808	8.49951
A0A0M2XQJ7	Uncharacterized protein OS=Corynebacterium xerosis GN=WU86_01455 PE=4 SV=1 - [A0A0M2XQJ7_9CORY]	6.08	1	1	1	1					1.83851	6.08	1	1	148	15.246	7.6792
A0A1L1SU70	Tropomodulin 2, isoform CRA_c OS=Mus musculus GN=Tmod2 PE=1 SV=1 - [A0A1L1SU70_MOUSE]	6.05	11	1	1	1	3.1931	6.05	1	1					248	27.7913	4.91943
H2R7E1	Uncharacterized protein OS=Pan troglodytes GN=KRT80 PE=3 SV=1 - [H2R7E1_PANTR]	6.05	36	1	2	84	80.4701	6.05	2	35	120.385	2.66	1	49	413	46.2616	5.31299
B7Z438	cDNA FLJ56352, highly similar to Succinyl-CoA ligase (GDP-forming) subunit alpha, mitochondrial (EC 6.2.1.4) OS=Homo sapiens PE=2 SV=1 - [B7Z438_HUMAN]	6.05	6	1	1	2					6.92715	6.05	1	2	248	26.4587	8.93896
H2QGZ5	Cytoplasmic tRNA 2-thiolation protein 1 OS=Pan troglodytes GN=CTU1 PE=3 SV=1 - [H2QGZ5_PANTR]	6.03	2	1	1	1					2.7303	6.03	1	1	348	36.5089	9.20264
B7Z5E7	cDNA FLJ51046, highly similar to 60 kDa heat shock protein, mitochondrial OS=Homo sapiens PE=2 SV=1 - [B7Z5E7_HUMAN]	6	9	2	2	2	7.77805	6	2	2					517	55.0491	5.60498
P04104	Keratin, type II cytoskeletal 1 OS=Mus musculus GN=Krt1 PE=1 SV=4 - [K2C1_MOUSE]	5.97	7	1	5	75	101.229	5.97	5	38	102.27	5.97	5	37	637	65.5653	8.14795
A0A087WY61	Nuclear mitotic apparatus protein 1 OS=Homo sapiens GN=NUMA1 PE=1 SV=1 - [A0A087WY61_HUMAN]	5.96	22	8	8	9		0			30.747	5.96	8	9	2099	236.019	5.92236
Q8TEK8	FLJ00186 protein (Fragment) OS=Homo sapiens GN=FLJ00186 PE=1 SV=1 - [Q8TEK8_HUMAN]	5.95	6	1	1	1	2.18639	5.95	1	1					185	20.8923	9.11475
X2JEV0	RecQ protein-like 4 (Fragment) OS=Homo sapiens GN=RECQL4 PE=2 SV=1 - [X2JEV0_HUMAN]	5.95	8	4	4	5	11.2642	5.95	4	4	3.40171	1.82	1	1	991	109.185	7.06396
U3KNF5	Uncharacterized protein OS=Oryctolagus cuniculus GN=ILKAP PE=3 SV=1 - [U3KNF5_RABIT]	5.93	10	2	2	2	2.38904	2.54	1	1	2.54272	3.39	1	1	354	38.6977	8.00146
Q8IUS9	HCG1992264, isoform CRA_a (Fragment) OS=Homo sapiens GN=PLEKHA7 PE=2 SV=1 - [Q8IUS9_HUMAN]	5.88	10	1	1	1					2.70013	5.88	1	1	238	26.3457	9.86182
G1NYW2	Uncharacterized protein OS=Myotis lucifugus GN=GSK3B PE=3 SV=1 - [G1NYW2_MYOLU]	5.88	9	1	1	1					2.52935	5.88	1	1	408	45.3493	8.63135
H0V845	Uncharacterized protein OS=Cavia porcellus GN=SLC7A5 PE=4 SV=1 - [H0V845_CAVPO]	5.86	8	1	1	1		0			0	5.86	1	1	495	53.9518	7.73779
K1RPN5	Phosphoglycerate kinase (Fragment) OS=human gut metagenome GN=OBE_16881 PE=4 SV=1 - [K1RPN5_9ZZZZ]	5.86	1	1	1	1					3.85139	5.86	1	1	324	35.5657	5.77002
Q80V43	Phosphatidylinositol glycan anchor biosynthesis, class K OS=Mus musculus GN=Pigk PE=2 SV=1 - [Q80V43_MOUSE]	5.83	11	1	1	1	2.86342	5.83	1	1					206	23.7389	6.53662
G1U0B5	Protein phosphatase methylesterase 1 OS=Oryctolagus cuniculus PE=3 SV=1 - [G1U0B5_RABIT]	5.83	6	2	2	2					6.04568	5.83	2	2	343	37.7	6.45557
B9A008	U3 small nucleolar ribonucleoprotein protein IMP4 (Fragment) OS=Homo sapiens GN=IMP4 PE=1 SV=1 - [B9A008_HUMAN]	5.81	9	1	1	1	2.73743	5.81	1	1		0			172	19.6062	9.70068
H2QZP4	Uncharacterized protein OS=Pan troglodytes GN=TXNDC5 PE=3 SV=1 - [H2QZP4_PANTR]	5.81	11	2	2	2					3.92374	5.81	2	2	310	34.6894	5.70654
Q15136	Protein kinase A-alpha (Fragment) OS=Homo sapiens GN=KIN27 PE=1 SV=1 - [Q15136_HUMAN]	5.8	6	1	1	2	2.06241	5.8	1	1	2.04328	5.8	1	1	207	23.9386	9.26123
A0A087WY00	Unconventional myosin-Va OS=Homo sapiens GN=MYO5A PE=1 SV=1 - [A0A087WY00_HUMAN]	5.8	25	8	8	8	8.27562	2.79	4	4	10.1253	3.01	4	4	1828	212.067	8.63135
A0A0E3XQU3	NAD(P) transhydrogenase subunit alpha OS=Mycobacterium chelonae GN=BKG75_10155 PE=4 SV=1 - [A0A0E3XQU3_MYCCH]	5.8	7	1	1	1	2.16782	5.8	1	1					362	37.4097	4.89404
A0A086C0N2	Methionine ABC transporter substrate-binding protein OS=Pseudomonas aeruginosa VRFPA01 GN=G039_0304900 PE=4 SV=1 - [A0A086C0N2_PSEAI]	5.79	4	1	1	1					2.83927	5.79	1	1	259	28.1563	7.37158
G1U9S2	Serum albumin OS=Oryctolagus cuniculus GN=ALB PE=1 SV=1 - [G1U9S2_RABIT]	5.76	1	1	3	26	38.3597	5.76	3	10	65.9691	1.97	2	16	608	68.9204	6.30322
B4DKT9	cDNA FLJ54052, highly similar to Alpha-1 catenin (Cadherin-associated protein) OS=Homo sapiens PE=2 SV=1 - [B4DKT9_HUMAN]	5.75	26	3	3	4	6.65157	5.75	3	4		0			783	86.5865	5.85889
E9PCY5	DNA topoisomerase 2 (Fragment) OS=Homo sapiens GN=TOP2B PE=1 SV=1 - [E9PCY5_HUMAN]	5.74	44	2	5	7	2.92367	1.13	1	1	17.3779	5.74	5	6	1150	130.398	8.47021
A0A0A1XY09	Photosynthetic protein synthase II OS=Anaplasma phagocytophilum str. MRK GN=O997_04865 PE=4 SV=1 - [A0A0A1XY09_ANAPH]	5.74	2	1	1	5					8.47037	5.74	1	5	209	23.3416	5.04639
H0Y7K8	Structural maintenance of chromosomes protein 1A (Fragment) OS=Homo sapiens GN=SMC1A PE=1 SV=2 - [H0Y7K8_HUMAN]	5.73	19	1	1	1		0			0	5.73	1	1	262	30.5251	9.02686
H0YMU3	Isocitrate dehydrogenase [NAD] subunit alpha, mitochondrial (Fragment) OS=Homo sapiens GN=IDH3A PE=1 SV=1 - [H0YMU3_HUMAN]	5.71	11	1	1	1					2.82646	5.71	1	1	175	19.235	9.46631
A0A086C1A0	30S ribosomal protein S2 OS=Pseudomonas aeruginosa VRFPA01 GN=rpsB PE=3 SV=1 - [A0A086C1A0_PSEAI]	5.69	4	1	1	2	4.18962	5.69	1	2					246	27.3031	8.52881
A6H8X9	Centrosomal protein 170kDa OS=Homo sapiens GN=CEP170 PE=2 SV=1 - [A6H8X9_HUMAN]	5.68	23	6	6	6		0			12.6029	5.68	6	6	1460	161.34	7.00537
K7ES61	39S ribosomal protein L4, mitochondrial (Fragment) OS=Homo sapiens GN=MRPL4 PE=1 SV=1 - [K7ES61_HUMAN]	5.67	3	1	1	1		0			3.66905	5.67	1	1	300	33.7709	9.83252
H3BP49	Unconventional myosin-IXa (Fragment) OS=Homo sapiens GN=MYO9A PE=1 SV=1 - [H3BP49_HUMAN]	5.67	8	1	1	1					2.10992	5.67	1	1	194	22.1443	4.90674
A0A098FIH4	3-hydroxyacyl-[acyl-carrier-protein] dehydratase FabZ OS=Bacillus simplex GN=fabZ_2 PE=3 SV=1 - [A0A098FIH4_9BACI]	5.67	19	1	1	1					2.22504	5.67	1	1	141	15.6994	5.63037
P15864	Histone H1.2 OS=Mus musculus GN=Hist1h1c PE=1 SV=2 - [H12_MOUSE]	5.66	15	1	1	7	7.12821	5.66	1	3	9.46787	5.66	1	4	212	21.2537	11.0044
I0QK89	Acetyltransferase, GNAT family OS=Streptococcus salivarius PS4 GN=PS4_55990 PE=4 SV=1 - [I0QK89_STRSL]	5.64	1	1	1	1					0	5.64	1	1	195	22.7167	7.86963
A0A024R3R7	HEAT repeat containing 1, isoform CRA_b OS=Homo sapiens GN=HEATR1 PE=4 SV=1 - [A0A024R3R7_HUMAN]	5.6	15	7	7	8		0			24.0076	5.6	7	8	2036	230.399	6.17627
B4RF88	Uncharacterized protein OS=Phenylobacterium zucineum (strain HLK1) GN=PHZ_c2248 PE=4 SV=1 - [B4RF88_PHEZH]	5.56	1	1	1	1	2.6545	5.56	1	1		0			342	37.7635	5.46533
G1NT89	Uncharacterized protein OS=Myotis lucifugus GN=AKR1A1 PE=4 SV=1 - [G1NT89_MYOLU]	5.54	33	2	2	2	4.6041	5.54	2	2					325	36.613	7.25439
A0A086BYI7	Succinate dehydrogenase OS=Pseudomonas aeruginosa VRFPA01 GN=sdhB PE=4 SV=1 - [A0A086BYI7_PSEAI]	5.53	10	1	1	1	3.61728	5.53	1	1					235	26.124	6.90283
A0A127T1U5	Catalase (Fragment) OS=uncultured bacterium PE=3 SV=1 - [A0A127T1U5_9BACT]	5.53	16	2	2	2	5.96809	5.53	2	2					651	73.372	6.17627
Q4R7V2	Testis cDNA clone: QtsA-14295, similar to human spastic paraplegia 20, spartin (Troyer syndrome)(SPG20) OS=Macaca fascicularis PE=2 SV=1 - [Q4R7V2_MACFA]	5.52	7	2	2	2	5.83116	5.52	2	2					326	35.4889	5.69385
Q59GG3	Transcription factor AP-4 (Activating enhancer binding protein 4) variant (Fragment) OS=Homo sapiens PE=2 SV=1 - [Q59GG3_HUMAN]	5.46	8	1	1	1					2.87243	5.46	1	1	293	33.071	6.29053
A0A1B8V0Q3	ATP synthase subunit alpha OS=Pseudomonas sp. AU11447 GN=atpA PE=3 SV=1 - [A0A1B8V0Q3_9PSED]	5.45	133	1	2	4	2.36497	2.53	1	1	8.32914	5.45	2	3	514	55.585	5.45264
A0A0N4VQX7	Uncharacterized protein OS=Enterobius vermicularis PE=4 SV=1 - [A0A0N4VQX7_ENTVE]	5.41	8	1	1	1		0			0	5.41	1	1	148	16.7084	5.45264
B4DM10	cDNA FLJ58263, highly similar to Microtubule-associated protein 4 OS=Homo sapiens PE=2 SV=1 - [B4DM10_HUMAN]	5.41	8	3	3	3					8.03552	5.41	3	3	740	79.5069	4.52588
A0A081UQ96	Succinate--CoA ligase [ADP-forming] subunit beta OS=Aeromonas hydrophila GN=sucC PE=3 SV=1 - [A0A081UQ96_AERHY]	5.41	11	1	2	2					4.49271	5.41	2	2	388	41.4324	6.02393
Q2KQ72	Chromosome-associated protein E OS=Homo sapiens PE=2 SV=1 - [Q2KQ72_HUMAN]	5.39	19	3	3	3					7.5125	5.39	3	3	760	85.9251	8.54346
A7H017	ATP synthase subunit beta OS=Campylobacter curvus (strain 525.92) GN=atpD PE=3 SV=1 - [ATPB_CAMC5]	5.38	40	0	2	2	2.51863	2.37	1	1	2.23875	3.01	1	1	465	50.8331	5.07178
A0A086BWJ2	Uncharacterized protein OS=Pseudomonas aeruginosa VRFPA01 GN=G039_0320250 PE=4 SV=1 - [A0A086BWJ2_PSEAI]	5.38	250	1	1	2	1.99713	5.38	1	1	1.83007	5.38	1	1	186	19.3409	5.17334
Q7Z406	Myosin-14 OS=Homo sapiens GN=MYH14 PE=1 SV=2 - [MYH14_HUMAN]	5.36	12	3	10	35	28.3557	2.41	5	9	80.7011	5.36	10	26	1995	227.732	5.60498
B0S6P6	DEAD (Asp-Glu-Ala-Asp) box helicase 3a OS=Danio rerio GN=ddx3a PE=1 SV=1 - [B0S6P6_DANRE]	5.36	5	1	3	7	10.3589	3.1	2	4	7.73721	3.67	2	3	709	78.2867	8.32373
A0A069FK59	N-hydroxyarylamine O-acetyltransferase OS=Escherichia coli GN=nhoA PE=3 SV=1 - [A0A069FK59_ECOLX]	5.34	2	1	1	1	3.18887	5.34	1	1					281	32.2542	6.34131
G1P1M5	Uncharacterized protein (Fragment) OS=Myotis lucifugus GN=TADA1 PE=4 SV=1 - [G1P1M5_MYOLU]	5.34	4	1	1	1					2.50402	5.34	1	1	262	29.0958	7.60596
A0A0N4VEZ0	Uncharacterized protein OS=Enterobius vermicularis PE=4 SV=1 - [A0A0N4VEZ0_ENTVE]	5.32	1	1	1	1		0			1.85088	5.32	1	1	301	33.118	5.021
Q8N2K0	Monoacylglycerol lipase ABHD12 OS=Homo sapiens GN=ABHD12 PE=1 SV=2 - [ABD12_HUMAN]	5.28	8	2	2	2					5.10699	5.28	2	2	398	45.0682	8.646
H0VAK6	Uncharacterized protein OS=Cavia porcellus GN=ECH1 PE=3 SV=1 - [H0VAK6_CAVPO]	5.28	4	1	1	1					3.71637	5.28	1	1	303	33.2406	7.10791
Q0EFA5	S protein OS=Homo sapiens GN=S PE=4 SV=1 - [Q0EFA5_HUMAN]	5.27	17	2	2	3	1.88082	1.76	1	1	6.27601	3.52	1	2	512	49.8655	8.1333
A8K6Q8	cDNA FLJ75881, highly similar to Homo sapiens transferrin receptor (p90, CD71) (TFRC), mRNA OS=Homo sapiens PE=2 SV=1 - [A8K6Q8_HUMAN]	5.26	14	3	3	6	10.677	3.16	2	4	7.35762	3.42	2	2	760	84.8199	6.60986
Q0BQE8	ATP synthase subunit beta OS=Granulibacter bethesdensis (strain ATCC BAA-1260 / CGDNIH1) GN=atpD PE=3 SV=1 - [ATPB_GRABC]	5.25	154	1	2	2					5.01513	5.25	2	2	476	51.1628	5.09717
A6NDI8	Histone deacetylase 6 (Fragment) OS=Homo sapiens GN=HDAC6 PE=1 SV=1 - [A6NDI8_HUMAN]	5.24	12	1	1	1					2.73647	5.24	1	1	210	23.3697	5.21143
A0A1B8THM3	DNA-directed RNA polymerase subunit beta OS=Pseudomonas sp. AU12215 GN=rpoB PE=3 SV=1 - [A0A1B8THM3_9PSED]	5.23	28	4	4	5	5.74599	4.05	3	3	6.53143	2.36	2	2	1357	150.69	5.69385
A2AH75	Kinesin family member 1B, isoform CRA_a OS=Mus musculus GN=Kif1b PE=1 SV=1 - [A2AH75_MOUSE]	5.22	90	5	5	6	7.69741	2.61	3	3	7.35973	3.48	3	3	1150	129.97	8.38232
A0A024R159	Hydroxysteroid dehydrogenase like 2, isoform CRA_c OS=Homo sapiens GN=HSDL2 PE=4 SV=1 - [A0A024R159_HUMAN]	5.22	3	1	1	1		0			4.26299	5.22	1	1	345	37.2962	6.1001
A4FU72	DOCK7 protein (Fragment) OS=Homo sapiens GN=DOCK7 PE=2 SV=1 - [A4FU72_HUMAN]	5.22	13	2	2	2					4.83522	5.22	2	2	383	44.3607	7.98682
W1MGX8	ATPase AAA OS=Pseudomonas aeruginosa VRFPA03 GN=M770_19995 PE=4 SV=1 - [W1MGX8_PSEAI]	5.21	1	1	1	1	0	5.21	1	1					326	36.1259	5.2749
K9J1P9	Putative histone h1x (Fragment) OS=Desmodus rotundus PE=2 SV=1 - [K9J1P9_DESRO]	5.21	5	2	2	5	5.2646	5.21	2	2	8.40304	5.21	2	3	211	22.2484	10.7993
K9IIY0	Secretory carrier-associated membrane protein OS=Desmodus rotundus PE=2 SV=1 - [K9IIY0_DESRO]	5.2	6	2	2	3	7.47808	5.2	1	2	1.96611	4.62	1	1	346	38.2193	7.15186
A0A086C278	50S ribosomal protein L1 OS=Pseudomonas aeruginosa VRFPA01 GN=rplA PE=3 SV=1 - [A0A086C278_PSEAI]	5.19	3	1	1	1					2.89985	5.19	1	1	231	24.2191	9.5835
J3KNE3	Platelet-activating factor acetylhydrolase IB subunit beta (Fragment) OS=Homo sapiens GN=PAFAH1B2 PE=1 SV=1 - [J3KNE3_HUMAN]	5.14	5	1	1	1					1.97836	5.14	1	1	175	18.3455	6.26514
B4E1S3	cDNA FLJ57860, highly similar to Transmembrane protein 109 OS=Homo sapiens PE=2 SV=1 - [B4E1S3_HUMAN]	5.13	4	1	1	1					2.63306	5.13	1	1	234	24.9677	9.53955
A0A086BXK8	Thiosulfate transporter subunit OS=Pseudomonas aeruginosa VRFPA01 GN=G039_0315785 PE=4 SV=1 - [A0A086BXK8_PSEAI]	5.12	4	1	1	1	2.12753	5.12	1	1					332	36.5887	7.53271
H0V0E2	Uncharacterized protein OS=Cavia porcellus PE=4 SV=1 - [H0V0E2_CAVPO]	5.1	5	1	1	2	2.29034	5.1	1	1	2.08021	5.1	1	1	157	19.1643	5.52881
B8ZZL5	MIT domain-containing protein 1 (Fragment) OS=Homo sapiens GN=MITD1 PE=1 SV=1 - [B8ZZL5_HUMAN]	5.08	4	1	1	1		0			2.7513	5.08	1	1	197	23.0157	7.44482
E2IF24	Pol protein (Fragment) OS=Human immunodeficiency virus 1 PE=3 SV=1 - [E2IF24_9HIV1]	5.08	1	1	1	1					2.43898	5.08	1	1	413	46.9716	8.98291
A0A0C4DH09	Protein transport protein Sec16A (Fragment) OS=Homo sapiens GN=SEC16A PE=1 SV=1 - [A0A0C4DH09_HUMAN]	5.06	8	2	2	2		0			5.72122	5.06	2	2	751	80.4968	6.72705
B2R514	cDNA, FLJ92300, Homo sapiens COP9 subunit 6 (MOV34 homolog, 34 kD) (COPS6), mRNA OS=Homo sapiens PE=2 SV=1 - [B2R514_HUMAN]	5.05	8	1	1	1					2.23236	5.05	1	1	297	33.554	5.99854
P12532	Creatine kinase U-type, mitochondrial OS=Homo sapiens GN=CKMT1A PE=1 SV=1 - [KCRU_HUMAN]	5.04	1	1	1	2	3.39068	5.04	1	1	3.54301	5.04	1	1	417	47.0072	8.33838
M0QX44	Amino acid transporter (Fragment) OS=Homo sapiens GN=SLC1A5 PE=1 SV=8 - [M0QX44_HUMAN]	5.04	8	1	1	1	3.07939	5.04	1	1		0			258	28.0678	8.76318
A0A086BX72	Serine hydroxymethyltransferase OS=Pseudomonas aeruginosa VRFPA01 GN=glyA PE=3 SV=1 - [A0A086BX72_PSEAI]	5.04	3	1	1	2					7.09161	5.04	1	2	417	45.1369	6.20166
G1P698	Uncharacterized protein OS=Myotis lucifugus PE=3 SV=1 - [G1P698_MYOLU]	5.01	31	2	3	10	15.4017	5.01	3	10		0			519	54.3771	5.03369
H2QRW9	LSM11, U7 small nuclear RNA associated OS=Pan troglodytes GN=LSM11 PE=2 SV=1 - [H2QRW9_PANTR]	5	2	1	1	2	6.09922	5	1	2					360	39.5336	10.9165
I7GM25	Macaca fascicularis brain cDNA clone: QflA-20547, similar to human hydroxysteroid (17-beta) dehydrogenase 4 (HSD17B4), mRNA, RefSeq: NM_000414.1 OS=Macaca fascicularis PE=2 SV=1 - [I7GM25_MACFA]	4.97	12	1	1	1					3.50519	4.97	1	1	302	32.9179	8.80713
H0V1B7	Carboxylic ester hydrolase OS=Cavia porcellus GN=LOC100721835 PE=3 SV=1 - [H0V1B7_CAVPO]	4.96	1	1	1	1	2.22433	4.96	1	1					565	62.6723	7.6499
W1MF63	50S ribosomal protein L2 OS=Pseudomonas aeruginosa VRFPA03 GN=rplB PE=3 SV=1 - [W1MF63_PSEAI]	4.96	1	1	1	1					3.37644	4.96	1	1	343	37.5011	11.1069
H0YAB0	Prelamin-A/C (Fragment) OS=Homo sapiens GN=LMNA PE=1 SV=1 - [H0YAB0_HUMAN]	4.95	15	1	1	2	3.05997	4.95	1	1	2.66085	4.95	1	1	182	20.7836	6.41748
B7Z957	cDNA FLJ52849, highly similar to Homo sapiens acyl-CoA thioesterase 7 (ACOT7), transcript variant hBACHc, mRNA OS=Homo sapiens PE=2 SV=1 - [B7Z957_HUMAN]	4.93	11	1	1	2	2.30744	4.93	1	1	1.99432	4.93	1	1	223	24.8056	6.93213
H2R055	Uncharacterized protein OS=Pan troglodytes GN=KRT74 PE=3 SV=1 - [H2R055_PANTR]	4.91	23	2	3	20	25.0827	4.91	3	11	26.2408	3.97	2	9	529	57.8717	7.7085
H2QIB9	Uncharacterized protein OS=Pan troglodytes GN=MRPS5 PE=3 SV=1 - [H2QIB9_PANTR]	4.9	5	2	2	2	2.5914	1.86	1	1	0	3.03	1	1	429	47.821	9.94971
E5RG39	Zinc finger protein 696 (Fragment) OS=Homo sapiens GN=ZNF696 PE=1 SV=1 - [E5RG39_HUMAN]	4.9	3	1	1	1					1.79274	4.9	1	1	204	20.987	7.7085
G1TES0	DNA-directed RNA polymerase subunit OS=Oryctolagus cuniculus GN=POLR2A PE=3 SV=1 - [G1TES0_RABIT]	4.89	12	5	5	5		0			13.4296	4.89	5	5	1739	192.968	7.37158
B3KN91	Putative tRNA (cytidine(32)/guanosine(34)-2'-O)-methyltransferase OS=Homo sapiens GN=FTSJ1 PE=2 SV=1 - [B3KN91_HUMAN]	4.89	3	1	1	1	2.5036	4.89	1	1					327	35.872	6.0874
Q6P5J0	Alpha-amylase OS=Danio rerio GN=amy2a PE=1 SV=1 - [Q6P5J0_DANRE]	4.88	2	1	2	3	4.76139	4.88	2	2	3.17649	2.93	1	1	512	56.9117	6.88818
A0A1B8TIM1	Protein TolB OS=Pseudomonas sp. AU12215 GN=tolB PE=3 SV=1 - [A0A1B8TIM1_9PSED]	4.86	3	2	2	2	2.61412	2.08	1	1	2.35888	2.78	1	1	432	47.7143	8.71924
K1TQU6	Ribose-phosphate pyrophosphokinase (Fragment) OS=human gut metagenome GN=OBE_03053 PE=4 SV=1 - [K1TQU6_9ZZZZ]	4.86	28	1	1	1	2.49083	4.86	1	1					247	26.3526	8.06006
A4ICD2	Putative T-complex protein 1, theta subunit OS=Leishmania infantum GN=LINJ_36_7240 PE=3 SV=1 - [A4ICD2_LEIIN]	4.84	1	1	1	1		0			3.2854	4.84	1	1	537	58.1438	5.40186
A0A1B8TKI7	Elongation factor Ts OS=Pseudomonas sp. AU12215 GN=tsf PE=3 SV=1 - [A0A1B8TKI7_9PSED]	4.84	2	1	1	1	3.00477	4.84	1	1					289	30.476	5.21143
A0Q7F0	Chaperone protein DnaK OS=Francisella tularensis subsp. novicida (strain U112) GN=dnaK PE=3 SV=1 - [DNAK_FRATN]	4.83	1	1	1	1	0	4.83	1	1					642	69.1697	5.0083
E0VBM6	Protein elav, putative OS=Pediculus humanus subsp. corporis GN=8231104 PE=4 SV=1 - [E0VBM6_PEDHC]	4.83	1	1	1	1					2.06365	4.83	1	1	373	40.9858	9.37842
A0A1S1K4D7	LysR family transcriptional regulator OS=Mycobacterium chelonae GN=BKG71_20840 PE=4 SV=1 - [A0A1S1K4D7_MYCCH]	4.83	5	1	1	1					0	4.83	1	1	290	31.9777	7.26904
H7C5W9	Sarcoplasmic/endoplasmic reticulum calcium ATPase 2 (Fragment) OS=Homo sapiens GN=ATP2A2 PE=1 SV=1 - [H7C5W9_HUMAN]	4.82	9	3	3	4	9.58311	4.82	3	3	4.04411	1.71	1	1	933	102.523	5.59229
B3KPF1	cDNA FLJ31714 fis, clone NT2RI2006506, weakly similar to Drosophila melanogaster rudimentary gene OS=Homo sapiens PE=2 SV=1 - [B3KPF1_HUMAN]	4.79	7	1	1	2	2.4396	4.79	1	1	2.02131	4.79	1	1	376	42.8539	8.01611
A0A024QZN4	Vinculin, isoform CRA_c OS=Homo sapiens GN=VCL PE=4 SV=1 - [A0A024QZN4_HUMAN]	4.78	10	3	3	3	6.70025	4.78	3	3		0			1066	116.649	6.0874
H2QFK4	Uncharacterized protein OS=Pan troglodytes GN=GIPC1 PE=4 SV=1 - [H2QFK4_PANTR]	4.78	8	1	1	2					2.45887	4.78	1	2	314	33.8816	6.55127
A4QPB0	IQ motif containing GTPase activating protein 1 OS=Homo sapiens GN=IQGAP1 PE=1 SV=1 - [A4QPB0_HUMAN]	4.77	16	4	4	5	9.38471	2.53	2	3	5.22794	2.23	2	2	1657	189.162	6.48096
K7ESE8	Bleomycin hydrolase (Fragment) OS=Homo sapiens GN=BLMH PE=1 SV=1 - [K7ESE8_HUMAN]	4.76	11	1	1	1	2.68466	4.76	1	1					231	26.7211	6.78564
F5GWG3	Retinoic acid-induced protein 3 (Fragment) OS=Homo sapiens GN=GPRC5A PE=1 SV=8 - [F5GWG3_HUMAN]	4.76	4	1	1	1	3.67552	4.76	1	1					273	30.5013	9.02686
W0U4I0	Elongation factor Tu OS=Ruminococcus bicirculans GN=tuf PE=3 SV=1 - [W0U4I0_9FIRM]	4.76	1	1	1	4	7.20598	4.76	1	2	8.41387	4.76	1	2	399	43.8463	5.21143
E0VUU3	Elongation factor 1-delta, putative OS=Pediculus humanus subsp. corporis GN=8230541 PE=3 SV=1 - [E0VUU3_PEDHC]	4.74	1	1	1	1					1.81761	4.74	1	1	274	30.5974	5.50342
J3QLE5	Small nuclear ribonucleoprotein-associated protein N (Fragment) OS=Homo sapiens GN=SNRPN PE=1 SV=1 - [J3QLE5_HUMAN]	4.73	20	1	1	4	5.20934	4.73	1	2	5.32981	4.73	1	2	169	17.5353	9.99365
Q921I1	Serotransferrin OS=Mus musculus GN=Tf PE=1 SV=1 - [TRFE_MOUSE]	4.73	1	3	3	6	7.95558	3.44	2	3	8.0993	3.16	2	3	697	76.6737	7.18115
G1U147	Uncharacterized protein OS=Oryctolagus cuniculus PE=4 SV=1 - [G1U147_RABIT]	4.73	1	1	1	6	11.7206	4.73	1	4	6.52765	4.73	1	2	275	30.5627	10.1108
H0VHM4	Uncharacterized protein OS=Cavia porcellus GN=ZNF691 PE=4 SV=1 - [H0VHM4_CAVPO]	4.73	6	1	1	1	3.19931	4.73	1	1		0			275	31.0329	8.55811
F8WD96	Cathepsin D OS=Homo sapiens GN=CTSD PE=1 SV=1 - [F8WD96_HUMAN]	4.71	11	1	1	1		0			3.45813	4.71	1	1	276	29.9811	7.41553
M0R2S2	Epidermal growth factor receptor substrate 15-like 1 OS=Homo sapiens GN=EPS15L1 PE=1 SV=1 - [M0R2S2_HUMAN]	4.7	12	1	1	1	3.55415	4.7	1	1					447	49.8263	5.13525
A0A0A0MSJ3	RAB guanine nucleotide exchange factor (GEF) 1, isoform CRA_c OS=Homo sapiens GN=RABGEF1 PE=1 SV=1 - [A0A0A0MSJ3_HUMAN]	4.68	10	1	1	1	3.13392	4.68	1	1					299	34.4155	5.41455
H2QPH0	Uncharacterized protein OS=Pan troglodytes GN=AHNAK PE=4 SV=1 - [H2QPH0_PANTR]	4.67	9	5	6	6		0			13.0567	4.67	6	6	5891	628.924	6.12549
A0A0A0MR36	Unconventional myosin-Vb (Fragment) OS=Homo sapiens GN=MYO5B PE=1 SV=1 - [A0A0A0MR36_HUMAN]	4.66	17	3	3	3	5.52834	3.01	2	2	0	1.66	1	1	965	111.901	6.25244
C1GVR2	Uncharacterized protein OS=Paracoccidioides lutzii (strain ATCC MYA-826 / Pb01) GN=PAAG_02607 PE=4 SV=1 - [C1GVR2_PARBA]	4.66	1	1	1	1		0			2.20167	4.66	1	1	429	46.5936	7.1958
K7EJC1	26S proteasome non-ATPase regulatory subunit 8 OS=Homo sapiens GN=PSMD8 PE=1 SV=1 - [K7EJC1_HUMAN]	4.65	9	1	1	1	1.95932	4.65	1	1		0			172	19.7682	6.93213
A0A087WTB8	Ubiquitin carboxyl-terminal hydrolase OS=Homo sapiens GN=UCHL3 PE=1 SV=1 - [A0A087WTB8_HUMAN]	4.64	10	1	1	1	2.45961	4.64	1	1					194	21.9309	4.93213
H2PZ38	Uncharacterized protein OS=Pan troglodytes GN=PARS2 PE=4 SV=1 - [H2PZ38_PANTR]	4.63	5	2	2	2					2.71573	4.63	2	2	475	53.2401	8.01611
B2RA91	cDNA, FLJ94773, highly similar to Homo sapiens splicing factor, arginine/serine-rich 2, interacting protein (SFRS2IP), mRNA OS=Homo sapiens PE=2 SV=1 - [B2RA91_HUMAN]	4.62	17	4	4	4	3.2198	2.35	2	2	5.06121	2.26	2	2	1148	128.847	8.29443
B4DZH7	cDNA FLJ56367 OS=Homo sapiens PE=2 SV=1 - [B4DZH7_HUMAN]	4.62	4	1	1	1					2.40828	4.62	1	1	346	38.5443	8.99756
E9PF10	Nuclear pore complex protein Nup155 OS=Homo sapiens GN=NUP155 PE=1 SV=1 - [E9PF10_HUMAN]	4.6	14	4	4	5	4.0902	1.36	1	1	10.6232	3.24	3	4	1327	148	6.30322
P46013	Proliferation marker protein Ki-67 OS=Homo sapiens GN=MKI67 PE=1 SV=2 - [KI67_HUMAN]	4.58	2	8	8	9	2.30632	0.68	1	1	19.8575	4.58	8	8	3256	358.474	9.45166
Q4R935	Testis cDNA clone: QtsA-10787, similar to human eukaryotic translation initiation factor 4B (EIF4B),mRNA, RefSeq: NM_001417.1 OS=Macaca fascicularis PE=2 SV=1 - [Q4R935_MACFA]	4.58	12	1	1	2	6.14373	4.58	1	2		0			349	39.5451	9.20264
A0A086BYN8	ABC transporter substrate-binding protein OS=Pseudomonas aeruginosa VRFPA01 GN=G039_0312035 PE=3 SV=1 - [A0A086BYN8_PSEAI]	4.58	1	1	1	1	2.71625	4.58	1	1					284	30.9182	7.66455
H2QRG6	RAD50 homolog OS=Pan troglodytes GN=RAD50 PE=2 SV=1 - [H2QRG6_PANTR]	4.57	38	5	5	6		0			15.7923	4.57	5	6	1312	153.77	6.88818
A0A086BTL9	ATP phosphoribosyltransferase regulatory subunit OS=Pseudomonas aeruginosa VRFPA01 GN=hisZ PE=3 SV=1 - [A0A086BTL9_PSEAI]	4.57	2	1	1	1		0			2.27968	4.57	1	1	394	42.6089	5.19873
O88348	Deubiquitinating enzyme (Fragment) OS=Mus musculus GN=Usp12 PE=2 SV=1 - [O88348_MOUSE]	4.55	16	1	1	1					1.90097	4.55	1	1	176	20.7022	7.04932
B3KY56	cDNA FLJ46898 fis, clone UTERU3022168, highly similar to Protein FAM62A OS=Homo sapiens PE=2 SV=1 - [B3KY56_HUMAN]	4.54	9	3	3	3		0			8.86385	4.54	3	3	1058	117.32	5.89697
G1T4P8	Uncharacterized protein OS=Oryctolagus cuniculus GN=GLRX3 PE=4 SV=2 - [G1T4P8_RABIT]	4.53	8	1	1	1					2.46768	4.53	1	1	287	32.3635	5.2749
A0A086BUE3	LysR family transcriptional regulator OS=Pseudomonas aeruginosa VRFPA01 GN=G039_0325605 PE=4 SV=1 - [A0A086BUE3_PSEAI]	4.52	3	1	1	2	3.05431	4.52	1	1	1.81954	4.52	1	1	310	34.2741	6.7417
G1THY0	Protein AAR2 homolog OS=Oryctolagus cuniculus GN=AAR2 PE=4 SV=1 - [G1THY0_RABIT]	4.51	8	1	1	1					3.00998	4.51	1	1	355	39.5048	6.29053
Q5SVL2	Caspase-7 (Fragment) OS=Homo sapiens GN=CASP7 PE=1 SV=1 - [Q5SVL2_HUMAN]	4.5	4	1	1	1		0			0	4.5	1	1	222	24.7741	5.56689
D6RJF2	Polyadenylate-binding protein-interacting protein 1 (Fragment) OS=Homo sapiens GN=PAIP1 PE=1 SV=1 - [D6RJF2_HUMAN]	4.5	9	1	1	1	2.13524	4.5	1	1					200	22.5981	4.75439
A0A1B8VFA2	Branched chain amino acid ABC transporter substrate-binding protein OS=Pseudomonas sp. AU11447 GN=A6723_008320 PE=4 SV=1 - [A0A1B8VFA2_9PSED]	4.5	1	1	1	2	3.53802	4.5	1	1	3.66018	4.5	1	1	378	40.3266	7.03467
E5LLH3	Pol protein (Fragment) OS=Human immunodeficiency virus 2 GN=pol PE=3 SV=1 - [E5LLH3_9HIV2]	4.49	6	1	1	1					1.73453	4.49	1	1	468	53.7042	9.02686
M7CAE5	Succinate--CoA ligase [ADP-forming] subunit alpha OS=Morganella morganii SC01 GN=sucD PE=3 SV=1 - [M7CAE5_MORMO]	4.48	3	1	1	1	0	4.48	1	1					290	29.7305	6.78564
A0A1R3F8X0	50S ribosomal protein L5 OS=Vibrio sp. 10N.222.47.A9 GN=rplE PE=3 SV=1 - [A0A1R3F8X0_9VIBR]	4.47	5	1	1	1	1.72252	4.47	1	1					179	20.1075	9.40771
H2QPZ5	Tet oncogene family member 2 OS=Pan troglodytes GN=TET2 PE=2 SV=1 - [H2QPZ5_PANTR]	4.45	8	5	5	5	14.9337	4.45	5	5					2002	223.674	8.01611
H2QZR4	Uncharacterized protein OS=Pan troglodytes GN=ST5 PE=4 SV=1 - [H2QZR4_PANTR]	4.43	3	2	2	2		0			5.50051	4.43	2	2	858	94.1558	9.59814
B0V0W6	Protein arginine methyltransferase 3 (Fragment) OS=Danio rerio GN=prmt3 PE=1 SV=1 - [B0V0W6_DANRE]	4.42	2	1	1	1	2.34141	4.42	1	1		0			226	25.1748	5.17334
O15451	Proline and glutamic acid rich nuclear protein isoform (Fragment) OS=Homo sapiens PE=2 SV=2 - [O15451_HUMAN]	4.41	15	3	4	5	8.14625	3.04	3	3	4.91151	2.64	2	2	1021	109.068	4.25928
B3KT25	cDNA FLJ37504 fis, clone BRAWH2017103, highly similar to ATPase WRNIP1 OS=Homo sapiens PE=2 SV=1 - [B3KT25_HUMAN]	4.4	6	2	2	2	4.06209	2.28	1	1	3.59777	2.12	1	1	614	66.6332	6.34131
Q6DEJ9	Dolichyl-phosphate mannosyltransferase polypeptide 1, catalytic subunit OS=Danio rerio GN=dpm1 PE=1 SV=1 - [Q6DEJ9_DANRE]	4.4	8	1	1	1					0	4.4	1	1	250	28.1149	9.18799
C9JZB0	Inositol polyphosphate 5-phosphatase K (Fragment) OS=Homo sapiens GN=INPP5K PE=1 SV=1 - [C9JZB0_HUMAN]	4.37	9	1	1	1					3.20714	4.37	1	1	229	26.7065	8.30908
W1MU71	DNA polymerase III subunit beta OS=Pseudomonas aeruginosa VRFPA03 GN=M770_29950 PE=4 SV=1 - [W1MU71_PSEAI]	4.36	3	1	1	2	3.51729	4.36	1	1	2.63198	4.36	1	1	367	40.6693	5.24951
G1PQF3	Uncharacterized protein OS=Myotis lucifugus GN=SF3B3 PE=4 SV=1 - [G1PQF3_MYOLU]	4.36	11	4	4	7	9.08232	2.14	2	3	12.3945	4.36	4	4	1216	135.32	5.23682
A0A075B730	Epiplakin OS=Homo sapiens GN=EPPK1 PE=1 SV=2 - [A0A075B730_HUMAN]	4.35	3	2	2	3	3.13185	2.47	1	1	6.45842	4.35	2	2	5063	552.791	5.60498
H0Y7U8	Girdin (Fragment) OS=Homo sapiens GN=CCDC88A PE=1 SV=8 - [H0Y7U8_HUMAN]	4.35	12	2	2	2	5.23645	4.35	2	2					736	83.4415	7.7085
H2QSA5	PAK1 interacting protein 1 OS=Pan troglodytes GN=PAK1IP1 PE=2 SV=1 - [H2QSA5_PANTR]	4.34	2	1	1	2	2.22701	4.34	1	1	2.45906	4.34	1	1	392	43.8798	8.83643
H0V2M8	H/ACA ribonucleoprotein complex subunit OS=Cavia porcellus GN=GAR1 PE=3 SV=1 - [H0V2M8_CAVPO]	4.33	8	1	1	5	5.08958	4.33	1	2	7.73004	4.33	1	3	208	21.4837	10.0376
I7GE26	Macaca fascicularis brain cDNA clone: QmoA-10658, similar to human zinc finger protein 24 (KOX 17) (ZNF24), mRNA, RefSeq: NM_006965.1 OS=Macaca fascicularis PE=2 SV=1 - [I7GE26_MACFA]	4.32	8	1	1	2		0			5.98359	4.32	1	2	301	34.358	6.63916
Q3UBS3	Haptoglobin OS=Mus musculus GN=Hp PE=1 SV=1 - [Q3UBS3_MOUSE]	4.32	1	1	1	4					10.5871	4.32	1	4	347	38.7275	6.29053
C9J4M6	DNA-directed RNA polymerase subunit beta OS=Homo sapiens GN=POLR2B PE=1 SV=3 - [C9J4M6_HUMAN]	4.31	22	4	4	4	2.47766	1.03	1	1	7.94725	3.28	3	3	1067	121.295	8.32373
A0A1V2YB07	30S ribosomal protein S2 OS=Clostridium haemolyticum GN=rpsB PE=3 SV=1 - [A0A1V2YB07_CLOHA]	4.29	8	1	1	1	1.98385	4.29	1	1					233	26.3109	6.06201
P12799	Fibrinogen gamma-B chain OS=Bos taurus GN=FGG PE=1 SV=1 - [FIBG_BOVIN]	4.28	1	2	2	18	24.8974	4.28	2	10	22.1059	2.48	1	8	444	50.2122	5.8335
A0A024RBS1	GCN1 general control of amino-acid synthesis 1-like 1 (Yeast), isoform CRA_b OS=Homo sapiens GN=GCN1L1 PE=4 SV=1 - [A0A024RBS1_HUMAN]	4.28	9	6	6	6		0			14.2398	4.28	6	6	2432	266.706	6.91748
Q4R3U6	Testis cDNA clone: QtsA-14061, similar to human pelota homolog (Drosophila) (PELO) OS=Macaca fascicularis PE=2 SV=1 - [Q4R3U6_MACFA]	4.28	8	1	1	1					3.01974	4.28	1	1	257	29.1229	7.7085
A0A0A8UGL2	Glutamine--fructose-6-phosphate aminotransferase [isomerizing] OS=Escherichia coli O26:H11 GN=glmS PE=3 SV=1 - [A0A0A8UGL2_ECOLX]	4.27	8	2	2	2	5.17132	4.27	2	2					609	66.8526	5.87158
Q68CW9	Putative uncharacterized protein DKFZp667O0311 (Fragment) OS=Homo sapiens GN=DKFZp667O0311 PE=2 SV=1 - [Q68CW9_HUMAN]	4.27	7	1	1	1	2.06452	4.27	1	1					281	31.4479	7.40088
G1T0M1	Uncharacterized protein OS=Oryctolagus cuniculus GN=KLF13 PE=4 SV=1 - [G1T0M1_RABIT]	4.26	4	1	1	1	2.05164	4.26	1	1					235	26.2142	10.3892
G1P2N0	Uncharacterized protein OS=Myotis lucifugus GN=DNAJC9 PE=4 SV=1 - [G1P2N0_MYOLU]	4.26	4	1	1	1		0			2.49175	4.26	1	1	258	29.8311	6.22705
H7C5K0	Helicase-like transcription factor (Fragment) OS=Homo sapiens GN=HLTF PE=1 SV=1 - [H7C5K0_HUMAN]	4.24	11	1	1	1					0	4.24	1	1	425	48.003	8.6167
Q6R327	Rapamycin-insensitive companion of mTOR OS=Homo sapiens GN=RICTOR PE=1 SV=1 - [RICTR_HUMAN]	4.22	7	4	4	4		0			12.6866	4.22	4	4	1708	192.097	7.47412
Q9Y5A3	NY-REN-25 antigen (Fragment) OS=Homo sapiens PE=2 SV=1 - [Q9Y5A3_HUMAN]	4.21	5	1	1	1	2.40056	4.21	1	1		0			285	32.6862	4.62744
G1PSS5	Proteasome subunit beta type OS=Myotis lucifugus GN=PSMB6 PE=3 SV=1 - [G1PSS5_MYOLU]	4.2	6	1	1	4	4.47899	4.2	1	2	5.18014	4.2	1	2	238	25.2124	4.91943
A0A0P0YEI1	ABC transporter oligopeptide permease OppD OS=Asaia bogorensis NBRC 16594 GN=Asbog_00703 PE=3 SV=1 - [A0A0P0YEI1_9PROT]	4.2	1	1	1	3	2.51824	4.2	1	1	4.72458	4.2	1	2	333	35.9029	8.06006
K9J2F2	Putative alkylated dna repair protein alkb log (Fragment) OS=Desmodus rotundus PE=2 SV=1 - [K9J2F2_DESRO]	4.18	7	1	1	2					5.09104	4.18	1	2	359	40.5208	8.92432
A0A0Q0UAW5	Cytochrome c oxidase caa3 assembly factor OS=Corynebacterium oculi GN=Cocul_00107 PE=4 SV=1 - [A0A0Q0UAW5_9CORY]	4.17	1	1	1	1	2.7257	4.17	1	1		0			695	76.4449	7.7085
E9PKY2	Terminal uridylyltransferase 4 (Fragment) OS=Homo sapiens GN=ZCCHC11 PE=1 SV=1 - [E9PKY2_HUMAN]	4.16	11	3	3	4	2.42781	1.16	1	1	8.23206	2.99	2	3	1203	135.89	7.91357
A0A0Q0ULN1	Glutamyl-tRNA reductase OS=Corynebacterium lowii GN=hemA PE=3 SV=1 - [A0A0Q0ULN1_9CORY]	4.16	1	1	1	2		0			5.42618	4.16	1	2	481	51.5223	5.14795
D2TNB2	Putative ABC transporter, substrate-binding protein OS=Citrobacter rodentium (strain ICC168) GN=ROD_45461 PE=3 SV=1 - [D2TNB2_CITRI]	4.15	6	1	1	4	3.10166	4.15	1	1	9.32616	4.15	1	3	337	36.3732	5.26221
X5H2M3	Uncharacterized protein OS=Ehrlichia sp. HF GN=EHF_0497 PE=4 SV=1 - [X5H2M3_9RICK]	4.15	1	1	1	2	2.36054	4.15	1	1	2.43907	4.15	1	1	193	22.1011	5.49072
B4DSR0	cDNA FLJ60080, highly similar to 130 kDa leucine-rich protein (LRP 130) (Fragment) OS=Homo sapiens PE=2 SV=1 - [B4DSR0_HUMAN]	4.14	10	3	3	4	3.26113	1.66	1	1	8.48147	4.14	3	3	1087	123.168	5.5415
H2QJF3	Uncharacterized protein OS=Pan troglodytes GN=RNF25 PE=4 SV=1 - [H2QJF3_PANTR]	4.14	2	1	1	1	0	4.14	1	1					459	51.2617	6.32861
B4E0E1	Poly [ADP-ribose] polymerase OS=Homo sapiens PE=2 SV=1 - [B4E0E1_HUMAN]	4.13	9	3	3	3		0			10.9049	4.13	3	3	993	111.056	8.86572
H2RA42	Formin homology 2 domain containing 1 OS=Pan troglodytes GN=FHOD1 PE=2 SV=1 - [H2RA42_PANTR]	4.12	9	3	3	4					14.1565	4.12	3	4	1164	126.453	6.53662
H2RED0	Uncharacterized protein OS=Pan troglodytes PE=4 SV=1 - [H2RED0_PANTR]	4.12	11	1	1	1					1.6686	4.12	1	1	194	21.9143	6.06201
A0A0S2Z476	Proteasome 26S subunit non-ATPase 12 isoform 2 OS=Homo sapiens GN=PSMD12 PE=2 SV=1 - [A0A0S2Z476_HUMAN]	4.11	6	1	1	1	2.75448	4.11	1	1					316	36.5641	7.56201
A0A1Q9W760	4-amino-4-deoxychorismate lyase OS=Mycobacterium sp. 27335 GN=BKG60_21330 PE=4 SV=1 - [A0A1Q9W760_9MYCO]	4.11	2	1	1	1					1.75655	4.11	1	1	292	31.0821	5.19873
U3KNK4	Uncharacterized protein OS=Oryctolagus cuniculus GN=GMPPA PE=4 SV=1 - [U3KNK4_RABIT]	4.1	6	1	1	1					2.61671	4.1	1	1	390	42.9112	6.94678
C7TNU5	Putative Heat Shock Protein (Fragment) OS=Angiostrongylus cantonensis GN=hsp-60 PE=2 SV=1 - [C7TNU5_ANGCA]	4.09	7	1	1	2	3.5483	4.09	1	1	1.71994	4.09	1	1	416	44.0983	5.07178
H2R5T0	Uncharacterized protein OS=Pan troglodytes PE=4 SV=1 - [H2R5T0_PANTR]	4.08	7	1	1	1	3.96705	4.08	1	1					466	51.5472	8.01611
Q5T8R3	Monocarboxylate transporter 1 (Fragment) OS=Homo sapiens GN=SLC16A1 PE=1 SV=1 - [Q5T8R3_HUMAN]	4.05	7	1	1	5	4.5254	4.05	1	2	9.26495	4.05	1	3	296	31.6685	9.43701
A6MK21	Complement component C3-like protein (Fragment) OS=Callithrix jacchus PE=2 SV=1 - [A6MK21_CALJA]	4.04	1	1	1	1					2.89528	4.04	1	1	223	26.1316	4.89404
J3KSW8	Myosin phosphatase Rho-interacting protein (Fragment) OS=Homo sapiens GN=MPRIP PE=1 SV=1 - [J3KSW8_HUMAN]	4.03	10	2	2	2					5.46294	4.03	2	2	844	95.8704	6.03662
A0A0H3GT65	Urea ABC transporter, urea binding protein OS=Klebsiella pneumoniae subsp. pneumoniae (strain HS11286) GN=KPHS_25380 PE=4 SV=1 - [A0A0H3GT65_KLEPH]	4.02	3	1	1	4	9.41058	4.02	1	3	4.03683	4.02	1	1	423	46.1635	6.37939
B4E216	cDNA FLJ57339, highly similar to Complement C3 OS=Homo sapiens PE=2 SV=1 - [B4E216_HUMAN]	4.01	5	1	3	3		0			6.57908	4.01	3	3	1098	122.515	6.93213
A0A0H3GZU3	High-affinity branched-chain amino acid ABC transporter periplasmic substrate-binding protein OS=Klebsiella pneumoniae subsp. pneumoniae (strain HS11286) GN=KPHS_32960 PE=4 SV=1 - [A0A0H3GZU3_KLEPH]	3.98	2	1	1	3	7.33269	3.98	1	2	3.27974	3.98	1	1	352	37.6439	5.96045
G5E9C7	Dual-specificity mitogen-activated protein kinase kinase 2 OS=Homo sapiens GN=MAP2K2 PE=1 SV=1 - [G5E9C7_HUMAN]	3.96	19	1	1	1		0			3.18936	3.96	1	1	303	33.8594	6.80029
B7Z437	cDNA FLJ53435, highly similar to Ezrin OS=Homo sapiens PE=2 SV=1 - [B7Z437_HUMAN]	3.96	53	2	2	2	1.74332	1.86	1	1	1.99736	2.1	1	1	429	51.2353	6.0874
A0A086C0N9	Uncharacterized protein OS=Pseudomonas aeruginosa VRFPA01 GN=G039_0304955 PE=4 SV=1 - [A0A086C0N9_PSEAI]	3.96	4	1	1	1					2.20845	3.96	1	1	455	51.078	8.77783
M0R0I5	Far upstream element-binding protein 2 (Fragment) OS=Homo sapiens GN=KHSRP PE=1 SV=1 - [M0R0I5_HUMAN]	3.94	9	1	1	1	3.33441	3.94	1	1		0			279	29.4369	8.57275
A0A0A8UEX5	Histidine biosynthesis bifunctional protein HisB OS=Escherichia coli O26:H11 GN=hisB PE=3 SV=1 - [A0A0A8UEX5_ECOLX]	3.94	15	1	1	5	6.71517	3.94	1	2	11.7276	3.94	1	3	355	40.2953	6.04932
A0A1V0HLV7	Chaperone protein HtpG OS=Candidatus Riesia pediculicola GN=htpG PE=3 SV=1 - [A0A1V0HLV7_9ENTR]	3.94	1	1	1	1	0	3.94	1	1		0			634	74.2683	9.12939
Q2GED6	50S ribosomal protein L2 OS=Neorickettsia sennetsu (strain ATCC VR-367 / Miyayama) GN=rplB PE=3 SV=1 - [RL2_NEOSM]	3.94	2	1	1	1					2.49702	3.94	1	1	279	30.1402	10.8579
D3DTC2	Acyltransferase like 2, isoform CRA_a OS=Homo sapiens GN=AYTL2 PE=4 SV=1 - [D3DTC2_HUMAN]	3.91	3	1	1	1	0	3.91	1	1					486	54.1547	5.36377
A0A1B8TAG8	Iron ABC transporter substrate-binding protein OS=Pseudomonas sp. AU12215 GN=A9513_018040 PE=4 SV=1 - [A0A1B8TAG8_9PSED]	3.9	2	1	1	3	5.59063	3.9	1	2	2.34967	3.9	1	1	333	36.4938	5.60498
A0A037YLE0	Fis family transcriptional regulator OS=Escherichia coli GN=ygeV PE=4 SV=1 - [A0A037YLE0_ECOLX]	3.89	9	1	1	1	4.88381	3.89	1	1					592	66.0545	6.53662
Q548R5	PAX1 OS=Mus musculus GN=Pax1 PE=2 SV=1 - [Q548R5_MOUSE]	3.88	6	1	1	1	2.54282	3.88	1	1					361	37.8354	9.29053
G4VJN5	Histone H2A OS=Schistosoma mansoni GN=Smp_130880 PE=3 SV=1 - [G4VJN5_SCHMA]	3.88	1	1	1	1	2.18957	3.88	1	1					232	25.6065	8.19189
Q8IXH2	MSTP057 OS=Homo sapiens PE=2 SV=1 - [Q8IXH2_HUMAN]	3.86	5	1	1	1		0			2.49918	3.86	1	1	259	29.8629	4.98291
Q6PEG1	Serine/threonine-protein phosphatase 2A 55 kDa regulatory subunit B (Fragment) OS=Homo sapiens GN=PPP2R2D PE=2 SV=1 - [Q6PEG1_HUMAN]	3.85	20	1	1	1		0			2.87442	3.85	1	1	286	33.1262	7.06396
B2RTE3	MCG17981 OS=Mus musculus GN=Prpf38a PE=2 SV=1 - [B2RTE3_MOUSE]	3.85	3	1	1	1					1.91668	3.85	1	1	312	37.4134	10.0083
A0A024RD67	Suppressor of Ty 3 homolog (S. cerevisiae), isoform CRA_b OS=Homo sapiens GN=SUPT3H PE=4 SV=1 - [A0A024RD67_HUMAN]	3.79	4	1	1	1	1.62254	3.79	1	1					317	35.77	6.87354
G1Q493	Uncharacterized protein OS=Myotis lucifugus PE=4 SV=1 - [G1Q493_MYOLU]	3.79	7	1	3	4	7.67774	1.38	1	2	4.14997	2.41	2	2	1162	129.145	6.59521
G1PKA4	Uncharacterized protein OS=Myotis lucifugus GN=VTN PE=4 SV=1 - [G1PKA4_MYOLU]	3.79	2	1	1	2	3.20658	3.79	1	1	3.87743	3.79	1	1	475	54.1147	5.03369
A0A087WXQ4	Putative protein shisa-8 OS=Homo sapiens GN=SHISA8 PE=4 SV=1 - [A0A087WXQ4_HUMAN]	3.78	2	1	1	1					3.34403	3.78	1	1	397	41.9685	10.5503
H2QIB3	Eukaryotic translation initiation factor 2-alpha kinase 3 OS=Pan troglodytes GN=EIF2AK3 PE=2 SV=1 - [H2QIB3_PANTR]	3.77	8	2	2	2	7.76611	3.77	2	2		0			1115	125.088	5.37646
H0WCW4	Uncharacterized protein OS=Cavia porcellus GN=CAND1 PE=4 SV=1 - [H0WCW4_CAVPO]	3.77	13	3	3	3		0			9.91532	3.77	3	3	1114	124.095	6.90283
E9QFE1	Myosin, heavy chain 14, non-muscle OS=Danio rerio GN=myh14 PE=1 SV=2 - [E9QFE1_DANRE]	3.76	5	1	6	42	43.5785	2.82	4	14	79.8903	3.76	6	28	2020	233.214	5.57959
B4DS46	cDNA FLJ55751, highly similar to DNA replication licensing factor MCM3 OS=Homo sapiens PE=2 SV=1 - [B4DS46_HUMAN]	3.74	13	2	2	2	0	2.67	1	1	2.05666	1.07	1	1	749	83.7194	5.99854
Q9P031	Thyroid transcription factor 1-associated protein 26 OS=Homo sapiens GN=CCDC59 PE=1 SV=2 - [TAP26_HUMAN]	3.73	1	1	1	1	0	3.73	1	1					241	28.652	9.87646
G1P4I2	Uncharacterized protein OS=Myotis lucifugus GN=TF PE=4 SV=1 - [G1P4I2_MYOLU]	3.71	8	1	3	7	11.8755	3.71	3	4	7.93579	2.3	2	3	998	109.094	7.86963
B7Z5C1	cDNA FLJ56126, highly similar to Programmed cell death 6-interacting protein OS=Homo sapiens PE=2 SV=1 - [B7Z5C1_HUMAN]	3.7	5	1	1	1	3.2963	3.7	1	1		0			649	71.7747	6.41748
A0A075B6F6	Minor histocompatibility antigen H13 (Fragment) OS=Homo sapiens GN=HM13 PE=1 SV=1 - [A0A075B6F6_HUMAN]	3.68	11	1	1	3	1.91248	3.68	1	1	4.17973	3.68	1	2	272	30.1427	7.88428
H0WBE7	Uncharacterized protein OS=Cavia porcellus GN=POF1B PE=4 SV=1 - [H0WBE7_CAVPO]	3.68	6	1	1	1	2.0126	3.68	1	1					299	34.2625	6.72705
T0TF99	ABC transporter permease protein OS=Streptococcus sp. HSISB1 GN=HSISB1_623 PE=4 SV=1 - [T0TF99_9STRE]	3.67	1	1	1	1	0	3.67	1	1		0			409	44.0531	9.15869
Q9Y4F5	Centrosomal protein of 170 kDa protein B OS=Homo sapiens GN=CEP170B PE=1 SV=4 - [C170B_HUMAN]	3.65	3	3	3	3		0			11.3444	3.65	3	3	1589	171.584	6.84424
A3M8K2	Outer membrane protein Omp38 OS=Acinetobacter baumannii (strain ATCC 17978 / CIP 53.77 / LMG 1025 / NCDC KC755 / 5377) GN=omp38 PE=3 SV=2 - [OMP38_ACIBT]	3.65	2	1	1	1		0			3.35789	3.65	1	1	356	38.4265	5.46533
H2R1I3	Filamin B, beta OS=Pan troglodytes GN=FLNB PE=2 SV=1 - [H2R1I3_PANTR]	3.65	17	3	8	16	20.3224	2.92	6	9	18.2087	3	6	7	2602	278.034	5.73193
Q01149	Collagen alpha-2(I) chain OS=Mus musculus GN=Col1a2 PE=1 SV=2 - [CO1A2_MOUSE]	3.64	8	3	3	6	13.2542	3.64	3	4	6.25772	2.48	2	2	1372	129.478	9.18799
H2QZ30	THO complex 2 OS=Pan troglodytes GN=THOC2 PE=2 SV=1 - [H2QZ30_PANTR]	3.64	18	4	4	5	11.3819	3.64	4	5					1593	182.675	8.44092
H2QXY8	TruB pseudouridine (Psi) synthase homolog 2 OS=Pan troglodytes GN=TRUB2 PE=2 SV=1 - [H2QXY8_PANTR]	3.63	2	1	1	1	2.04773	3.63	1	1		0			331	36.6723	9.1001
B3KPZ8	cDNA FLJ32530 fis, clone SMINT2000185, highly similar to TRANSKETOLASE (EC 2.2.1.1) OS=Homo sapiens PE=2 SV=1 - [B3KPZ8_HUMAN]	3.63	12	2	2	2	3.26473	3.63	1	1	2.35631	3.35	1	1	358	38.8632	7.72314
B4E3P1	cDNA FLJ57036, highly similar to Homo sapiens tropomyosin 2 (beta) (TPM2), transcript variant 2, mRNA OS=Homo sapiens PE=2 SV=1 - [B4E3P1_HUMAN]	3.63	1	1	1	1	2.43283	3.63	1	1		0			303	34.0763	5.04639
K9IUQ0	Putative kinectin 1 kinesin receptor (Fragment) OS=Desmodus rotundus PE=2 SV=1 - [K9IUQ0_DESRO]	3.63	11	3	3	3	9.83464	3.63	3	3					1158	133.666	5.66846
K9IMQ7	Uncharacterized protein OS=Desmodus rotundus PE=2 SV=1 - [K9IMQ7_DESRO]	3.62	15	1	1	1					2.62973	3.62	1	1	608	66.6501	5.22412
A5K6T9	Phosphoglycerate kinase OS=Plasmodium vivax (strain Salvador I) GN=PVX_099535 PE=3 SV=1 - [A5K6T9_PLAVS]	3.61	1	1	1	1					0	3.61	1	1	416	45.1538	6.88818
A0A1B8V4F8	Cell division protein FtsA OS=Pseudomonas sp. AU11447 GN=ftsA PE=3 SV=1 - [A0A1B8V4F8_9PSED]	3.61	2	1	1	1					3.67991	3.61	1	1	415	44.2411	5.50342
Q3KRA7	FGA protein (Fragment) OS=Homo sapiens GN=FGA PE=2 SV=1 - [Q3KRA7_HUMAN]	3.6	12	2	2	7	7.06868	3.6	2	3	8.70023	3.2	1	4	250	28.8129	9.43701
P11827	Beta-conglycinin, alpha' chain OS=Glycine max GN=CG-1 PE=2 SV=1 - [GLCAP_SOYBN]	3.6	1	2	2	2					5.14982	3.6	2	2	639	74.28	5.65576
H2QVF5	Nucleoporin 205kDa OS=Pan troglodytes GN=NUP205 PE=2 SV=1 - [H2QVF5_PANTR]	3.58	14	6	6	6		0			14.4299	3.58	6	6	2012	227.71	6.23975
Q96FA6	NCAPD3 protein (Fragment) OS=Homo sapiens GN=NCAPD3 PE=1 SV=2 - [Q96FA6_HUMAN]	3.58	3	1	1	1					3.01552	3.58	1	1	558	62.8896	8.1333
A0A1B8SZH1	Glycine/betaine ABC transporter substrate-binding protein OS=Pseudomonas sp. AU12215 GN=A9513_032500 PE=4 SV=1 - [A0A1B8SZH1_9PSED]	3.52	2	1	1	1	2.57359	3.52	1	1					284	31.0362	8.14795
A0A087X0K9	Tight junction protein ZO-1 OS=Homo sapiens GN=TJP1 PE=1 SV=1 - [A0A087X0K9_HUMAN]	3.52	23	4	4	5					14.3156	3.52	4	5	1676	187.734	6.69775
Q59ET1	Calcium homeostasis endoplasmic reticulum protein variant (Fragment) OS=Homo sapiens PE=2 SV=1 - [Q59ET1_HUMAN]	3.51	9	1	1	1	3.31814	3.51	1	1					399	45.5346	10.9897
U4V3U9	Uncharacterized protein OS=Ochrobactrum intermedium 229E GN=Q644_09220 PE=4 SV=1 - [U4V3U9_9RHIZ]	3.5	4	1	1	1		0			2.92196	3.5	1	1	400	45.3889	4.91943
H2Q4B7	Protein tyrosine phosphatase, receptor type, f polypeptide (PTPRF), interacting protein (Liprin), alpha 1 OS=Pan troglodytes GN=PPFIA1 PE=2 SV=1 - [H2Q4B7_PANTR]	3.49	16	3	3	3					8.43822	3.49	3	3	1202	135.713	6.26514
B4E3G4	cDNA FLJ50383, highly similar to CRSP complex subunit 3 OS=Homo sapiens PE=2 SV=1 - [B4E3G4_HUMAN]	3.47	16	3	3	3	7.84228	3.47	3	3		0			1009	115.516	7.62061
A0A0B6ESN7	Glyoxalase-like domain OS=Corynebacterium singulare GN=CSING_01205 PE=4 SV=1 - [A0A0B6ESN7_9CORY]	3.47	1	1	1	3	0	3.47	1	1	0	3.47	1	2	202	22.7013	6.52197
F2Z393	Transaldolase OS=Homo sapiens GN=TALDO1 PE=1 SV=1 - [F2Z393_HUMAN]	3.46	3	1	1	1		0			2.42602	3.46	1	1	318	35.3065	8.96826
A0A1D1VL88	Uncharacterized protein OS=Ramazzottius varieornatus GN=RvY_12958-1 PE=3 SV=1 - [A0A1D1VL88_RAMVA]	3.46	1	1	1	1					1.84183	3.46	1	1	492	53.4318	9.34912
A0A086C225	Spermidine/putrescine ABC transporter substrate-binding protein OS=Pseudomonas aeruginosa VRFPA01 GN=G039_0302880 PE=4 SV=1 - [A0A086C225_PSEAI]	3.45	2	1	1	1					2.24653	3.45	1	1	348	38.1452	5.69385
B4DZB4	cDNA FLJ51707, highly similar to Heat-shock protein 105 kDa OS=Homo sapiens PE=2 SV=1 - [B4DZB4_HUMAN]	3.44	7	1	1	1	4.27226	3.44	1	1					639	71.1613	8.45557
G1U5J5	Uncharacterized protein OS=Oryctolagus cuniculus GN=PLPP6 PE=4 SV=1 - [G1U5J5_RABIT]	3.44	3	1	1	1					2.27285	3.44	1	1	291	31.8838	10.228
B4DY67	cDNA FLJ56591, highly similar to Eukaryotic translation initiation factor 2C3 OS=Homo sapiens PE=2 SV=1 - [B4DY67_HUMAN]	3.43	25	1	1	1	4.4169	3.43	1	1		0			496	55.9996	8.93896
B2RBR9	cDNA, FLJ95650, highly similar to Homo sapiens karyopherin (importin) beta 1 (KPNB1), mRNA OS=Homo sapiens PE=2 SV=1 - [B2RBR9_HUMAN]	3.42	16	2	2	3	6.49051	1.71	1	2	4.45589	1.71	1	1	876	97.122	4.77979
B3KW17	cDNA FLJ41903 fis, clone PEBLM2005183, highly similar to 5'-3' exoribonuclease 1 OS=Homo sapiens PE=2 SV=1 - [B3KW17_HUMAN]	3.35	9	3	3	3	1.93563	0.99	1	1	4.82912	2.36	2	2	805	93.5503	6.58057
H0V831	Uncharacterized protein OS=Cavia porcellus GN=THYN1 PE=4 SV=1 - [H0V831_CAVPO]	3.33	5	1	1	1	1.91062	3.33	1	1		0			210	24.2982	7.56201
F8KQT1	NAD-dependent glyceraldehyde-3-phosphate dehydrogenase OS=Helicobacter bizzozeronii (strain CIII-1) GN=HBZC1_00990 PE=3 SV=1 - [F8KQT1_HELBC]	3.33	24	1	1	1	2.07205	3.33	1	1					240	26.3266	6.52197
A0JP02	PLEKHA5 protein OS=Homo sapiens GN=PLEKHA5 PE=1 SV=1 - [A0JP02_HUMAN]	3.32	8	2	2	2					5.78081	3.32	2	2	874	99.6318	6.72705
A0A170MV56	Elongation factor Tu OS=Fusobacterium necrophorum subsp. funduliforme GN=tuf PE=3 SV=1 - [A0A170MV56_9FUSO]	3.3	1	1	1	6	10.2487	3.3	1	4	6.12895	3.3	1	2	394	43.2061	5.23682
Q9R0D6	Transcobalamin-2 OS=Rattus norvegicus GN=Tcn2 PE=2 SV=1 - [TCO2_RAT]	3.28	1	1	1	2	3.39091	3.28	1	1	2.85267	3.28	1	1	427	47.3896	7.73779
T0UEM4	Competence-stimulating peptide ABC transporter permease protein ComB OS=Streptococcus sp. HSISB1 GN=HSISB1_1595 PE=4 SV=1 - [T0UEM4_9STRE]	3.27	1	1	1	1	0	3.27	1	1		0			459	50.9923	7.95752
H0W0L7	Uncharacterized protein OS=Cavia porcellus GN=ADARB1 PE=4 SV=1 - [H0W0L7_CAVPO]	3.26	1	1	1	1					2.07315	3.26	1	1	583	63.6385	8.51416
A0A024R2I7	RAD18 homolog (S. cerevisiae), isoform CRA_a OS=Homo sapiens GN=RAD18 PE=4 SV=1 - [A0A024R2I7_HUMAN]	3.23	2	1	1	1	4.21029	3.23	1	1					495	56.1592	7.41553
A0A1W2PNV4	Uncharacterized protein OS=Homo sapiens PE=4 SV=1 - [A0A1W2PNV4_HUMAN]	3.22	13	1	2	3	2.67875	1.75	1	1	5.29274	3.22	2	2	684	75.8248	8.5874
W2T3M2	Cullin family protein OS=Necator americanus GN=NECAME_11538 PE=3 SV=1 - [W2T3M2_NECAM]	3.21	1	1	1	1		0			2.36095	3.21	1	1	498	56.1552	8.47021
B7XL49	ATPase component of ABC transporter OS=Enterocytozoon bieneusi (strain H348) GN=EBI_23156 PE=4 SV=1 - [B7XL49_ENTBH]	3.18	1	1	1	4	8.49465	3.18	1	3	2.98814	3.18	1	1	377	36.8511	10.5796
H0V475	Uncharacterized protein OS=Cavia porcellus GN=Senp3 PE=4 SV=1 - [H0V475_CAVPO]	3.15	4	1	1	2	2.8179	3.15	1	1	2.4589	3.15	1	1	572	64.8676	8.45557
Q59EC6	Ret finger protein isoform beta variant (Fragment) OS=Homo sapiens PE=2 SV=1 - [Q59EC6_HUMAN]	3.14	5	1	1	1					2.27214	3.14	1	1	382	43.3549	8.1626
G1PW88	Uncharacterized protein (Fragment) OS=Myotis lucifugus GN=HAT1 PE=4 SV=1 - [G1PW88_MYOLU]	3.11	6	1	1	1					1.79826	3.11	1	1	418	49.3438	5.69385
A0A1B8V8D5	Glutamine ABC transporter ATP-binding protein OS=Pseudomonas sp. AU11447 GN=glnQ PE=4 SV=1 - [A0A1B8V8D5_9PSED]	3.1	1	1	1	2	1.83779	3.1	1	1	1.68423	3.1	1	1	258	29.0648	7.23975
A0A0R4IT38	Si:dkey-14d8.20 OS=Danio rerio GN=si:dkey-14d8.20 PE=4 SV=1 - [A0A0R4IT38_DANRE]	3.1	2	1	1	1		0			0	3.1	1	1	807	85.5295	5.05908
G1SVM2	Uncharacterized protein OS=Oryctolagus cuniculus GN=TMLHE PE=4 SV=1 - [G1SVM2_RABIT]	3.09	2	1	1	2	2.75579	3.09	1	1	2.99708	3.09	1	1	421	49.391	8.25049
B4DGH9	cDNA FLJ58772, highly similar to Fragile X mental retardation syndrome-related protein 1 OS=Homo sapiens PE=2 SV=1 - [B4DGH9_HUMAN]	3.08	20	1	1	1	2.09129	3.08	1	1					454	50.8604	7.04932
A7GZU3	Type I restriction/modification system, M subunit OS=Campylobacter curvus (strain 525.92) GN=hsdM PE=4 SV=1 - [A7GZU3_CAMC5]	3.07	1	1	1	1	3.83101	3.07	1	1					489	56.1507	5.47803
A0A1V2F3P6	D-alanine--D-alanine ligase OS=Aeromonas hydrophila GN=ddl PE=3 SV=1 - [A0A1V2F3P6_AERHY]	3.04	1	1	1	1	0	3.04	1	1					329	36.2764	5.24951
S5ZR24	Elongation factor Tu OS=Treponema pedis str. T A4 GN=tuf PE=3 SV=1 - [S5ZR24_9SPIO]	3.04	1	2	2	5	5.8585	3.04	2	2	6.99625	2.78	1	3	395	43.6435	5.64307
U4V697	Amino acid ABC transporter substrate-binding protein OS=Ochrobactrum intermedium 229E GN=Q644_21165 PE=4 SV=1 - [U4V697_9RHIZ]	3.04	1	1	1	1	1.68165	3.04	1	1		0			362	39.0307	6.07471
A0A0Q3BKF1	D-tagatose-1,6-bisphosphate aldolase subunit GatZ OS=Escherichia coli GN=gatZ PE=3 SV=1 - [A0A0Q3BKF1_ECOLX]	3.04	6	1	1	1					2.91498	3.04	1	1	362	40.8746	5.2876
Q4R850	Putative uncharacterized protein OS=Macaca fascicularis PE=2 SV=1 - [Q4R850_MACFA]	3.03	5	1	1	1		0			2.84142	3.03	1	1	363	41.2917	7.86963
B4DRA2	cDNA FLJ57828, highly similar to Treacle protein (Fragment) OS=Homo sapiens PE=2 SV=1 - [B4DRA2_HUMAN]	3.03	7	2	2	2		0			4.10504	3.03	2	2	923	93.7135	8.93896
G1NW78	Uncharacterized protein OS=Myotis lucifugus GN=COL1A1 PE=4 SV=1 - [G1NW78_MYOLU]	3.02	8	2	3	7	17.0211	3.02	3	5	4.15249	1.1	1	2	1459	138.34	5.92236
H0UWJ0	Uncharacterized protein OS=Cavia porcellus GN=TF PE=4 SV=1 - [H0UWJ0_CAVPO]	3.02	1	3	4	13		0			44.0141	3.02	4	13	992	109.334	7.50342
A0A024R281	E3 ubiquitin-protein ligase OS=Homo sapiens GN=NEDD4L PE=4 SV=1 - [A0A024R281_HUMAN]	3	8	1	1	1		0			0	3	1	1	834	96.2108	6.03662
F1Q7I4	Beta 3-glucosyltransferase a (Fragment) OS=Danio rerio GN=b3glcta PE=4 SV=2 - [F1Q7I4_DANRE]	2.99	2	1	1	4	4.98645	2.99	1	2	5.33068	2.99	1	2	301	33.688	6.93213
B2RE31	cDNA, FLJ96896 OS=Homo sapiens PE=2 SV=1 - [B2RE31_HUMAN]	2.98	2	1	1	2	2.85295	2.98	1	1	3.72896	2.98	1	1	504	56.4104	8.80713
H0UT44	Uncharacterized protein OS=Cavia porcellus GN=A2M PE=4 SV=1 - [H0UT44_CAVPO]	2.98	3	2	3	21	33.3034	2.98	3	11	28.183	2.98	3	10	1477	163.722	6.7417
Q9BTT5	Similar to NADH dehydrogenase (Ubiquinone) 1 alpha subcomplex, 9 (39kD) (Fragment) OS=Homo sapiens PE=2 SV=1 - [Q9BTT5_HUMAN]	2.96	6	1	1	1	1.78386	2.96	1	1					338	38.4175	9.67139
B3KY97	cDNA FLJ16235 fis, clone FEBRA2028516 OS=Homo sapiens PE=2 SV=1 - [B3KY97_HUMAN]	2.96	5	2	2	2		0			4.83748	2.96	2	2	1015	112.966	8.5874
S5ZXF8	ATPase OS=Treponema pedis str. T A4 GN=TPE_0187 PE=4 SV=1 - [S5ZXF8_9SPIO]	2.96	1	1	1	1	2.30962	2.96	1	1		0			406	46.6031	7.92822
A0A0R4IJY6	Myosin, heavy chain 11b, smooth muscle OS=Danio rerio GN=myh11b PE=1 SV=1 - [A0A0R4IJY6_DANRE]	2.94	3	1	4	16	14.7993	1.42	2	4	39.2965	2.33	3	12	1972	227.346	5.66846
H0Y512	Adipocyte plasma membrane-associated protein (Fragment) OS=Homo sapiens GN=APMAP PE=1 SV=1 - [H0Y512_HUMAN]	2.93	3	1	1	1					2.4577	2.93	1	1	409	45.3761	5.65576
H2RDB9	Uncharacterized protein OS=Pan troglodytes GN=USP47 PE=3 SV=1 - [H2RDB9_PANTR]	2.91	8	3	3	3		0			8.88904	2.91	3	3	1375	157.252	5.07178
A0A108TCT1	UDP-glucose 4-epimerase OS=Bacteroides stercoris GN=lnpD PE=4 SV=1 - [A0A108TCT1_BACSE]	2.91	1	1	1	1					1.84057	2.91	1	1	344	37.727	6.34131
D3DWL9	Cleavage and polyadenylation specific factor 1, 160kDa, isoform CRA_a OS=Homo sapiens GN=CPSF1 PE=4 SV=1 - [D3DWL9_HUMAN]	2.86	9	3	3	4	5.51629	2.12	2	2	5.71089	1.98	2	2	1365	151.89	6.32861
E0VPQ7	XK-related protein OS=Pediculus humanus subsp. corporis GN=8233423 PE=3 SV=1 - [E0VPQ7_PEDHC]	2.85	1	1	1	3	2.25296	2.85	1	1	4.80224	2.85	1	2	632	71.9443	5.40186
G1T412	Uncharacterized protein OS=Oryctolagus cuniculus GN=FYTTD1 PE=4 SV=1 - [G1T412_RABIT]	2.84	3	1	1	1	1.81867	2.84	1	1		0			317	35.8035	11.8101
B4E0K5	Mitogen-activated protein kinase OS=Homo sapiens GN=MAPK14 PE=1 SV=1 - [B4E0K5_HUMAN]	2.83	9	1	1	1					1.68144	2.83	1	1	283	32.3363	4.91943
P01029	Complement C4-B OS=Mus musculus GN=C4b PE=1 SV=3 - [CO4B_MOUSE]	2.82	21	3	3	4	12.0543	2.13	2	3	2.37397	0.69	1	1	1738	192.794	7.53271
B2R9R2	cDNA, FLJ94517, highly similar to Homo sapiens baculoviral IAP repeat-containing 4 (BIRC4), mRNA OS=Homo sapiens PE=2 SV=1 - [B2R9R2_HUMAN]	2.82	3	1	1	1	0	2.82	1	1					497	56.5874	6.65381
H0UYT0	Uncharacterized protein OS=Cavia porcellus GN=SUPT16H PE=4 SV=1 - [H0UYT0_CAVPO]	2.82	8	2	2	2					5.98042	2.82	2	2	886	101.544	7.84033
A0A0A8UJE1	Translation initiation factor IF-2 OS=Escherichia coli O26:H11 GN=infB PE=3 SV=1 - [A0A0A8UJE1_ECOLX]	2.81	8	2	2	3	7.06585	2.81	2	2	2.99688	2.47	1	1	890	97.2903	6.07471
A0A086C114	Formate-dependent phosphoribosylglycinamide formyltransferase OS=Pseudomonas aeruginosa VRFPA01 GN=purT PE=3 SV=1 - [A0A086C114_PSEAI]	2.8	1	1	1	2	2.19731	2.8	1	1	2.14775	2.8	1	1	393	42.2939	5.85889
B4DET5	cDNA FLJ59484, highly similar to Nuclear envelope pore membrane protein POM 121 OS=Homo sapiens PE=2 SV=1 - [B4DET5_HUMAN]	2.79	7	1	1	4	4.74162	2.79	1	1	14.8585	2.79	1	3	859	85.1964	9.84717
U3KN28	Uncharacterized protein OS=Oryctolagus cuniculus GN=KIAA1429 PE=4 SV=1 - [U3KN28_RABIT]	2.78	9	3	3	4	2.42365	2.17	2	2	2.70545	1.9	2	2	1477	164.192	6.1001
I7G982	Macaca fascicularis brain cDNA clone: QorA-10937, similar to human stress-induced-phosphoprotein 1 (Hsp70/Hsp90-organizingprotein) (STIP1), mRNA, RefSeq: NM_006819.1 OS=Macaca fascicularis PE=2 SV=1 - [I7G982_MACFA]	2.78	9	1	1	1	2.73795	2.78	1	1					468	53.928	6.43018
Q2KJF1	Alpha-1B-glycoprotein OS=Bos taurus GN=A1BG PE=1 SV=1 - [A1BG_BOVIN]	2.78	1	1	1	1					3.07498	2.78	1	1	503	53.5203	5.42725
A0A0S2W762	Phosphoglycerate kinase OS=Intestinimonas butyriciproducens GN=pgk PE=3 SV=1 - [A0A0S2W762_9FIRM]	2.78	1	1	1	1					2.32059	2.78	1	1	396	41.8939	5.70654
A0A1B8TFW2	Quinone oxidoreductase OS=Pseudomonas sp. AU12215 GN=A9513_002360 PE=4 SV=1 - [A0A1B8TFW2_9PSED]	2.77	2	1	1	1	1.63915	2.77	1	1					325	34.2698	7.88428
B4DM79	cDNA FLJ53848, highly similar to Inter-alpha-trypsin inhibitor heavy chain H2 OS=Homo sapiens PE=2 SV=1 - [B4DM79_HUMAN]	2.76	8	1	1	1					2.64942	2.76	1	1	543	60.6659	5.35107
H2QL90	Guanine nucleotide binding protein (G protein), beta polypeptide 1-like OS=Pan troglodytes GN=GNB1L PE=2 SV=1 - [H2QL90_PANTR]	2.75	3	1	1	2	2.10541	2.75	1	1	2.81494	2.75	1	1	327	35.375	7.81104
A0A1B8TBB7	Chromate resistance protein OS=Pseudomonas sp. AU12215 GN=A9513_003320 PE=4 SV=1 - [A0A1B8TBB7_9PSED]	2.72	4	1	1	1	2.03354	2.72	1	1					294	32.6478	5.47803
H2R244	Calcium-transporting ATPase OS=Pan troglodytes PE=3 SV=1 - [H2R244_PANTR]	2.71	43	2	2	2					6.05559	2.71	2	2	1219	134.487	5.90967
A0A1S1L3T0	Carnitine dehydratase OS=Mycobacterium franklinii GN=BKG76_22270 PE=4 SV=1 - [A0A1S1L3T0_9MYCO]	2.68	1	1	1	1	2.65127	2.68	1	1		0			373	39.7711	5.21143
Q92667	A-kinase anchor protein 1, mitochondrial OS=Homo sapiens GN=AKAP1 PE=1 SV=1 - [AKAP1_HUMAN]	2.66	3	1	1	1	2.54031	2.66	1	1					903	97.2809	4.94482
B3KXF2	cDNA FLJ45314 fis, clone BRHIP3005142, highly similar to Proteasome-associated protein ECM29 homolog OS=Homo sapiens PE=2 SV=1 - [B3KXF2_HUMAN]	2.66	9	2	2	2	0	1.75	1	1	2.22555	0.91	1	1	1314	145.279	6.59521
Q05BX6	RABEP1 protein (Fragment) OS=Homo sapiens GN=RABEP1 PE=2 SV=1 - [Q05BX6_HUMAN]	2.65	9	1	1	2	6.53344	2.65	1	2		0			716	82.3265	5.13525
G7Y2Y0	Neuropilin and tolloid-like protein 2 (Fragment) OS=Clonorchis sinensis GN=CLF_100212 PE=4 SV=1 - [G7Y2Y0_CLOSI]	2.65	1	1	1	1		0			0	2.65	1	1	1323	148.811	8.93896
H0VSG5	Uncharacterized protein OS=Cavia porcellus GN=DROSHA PE=3 SV=1 - [H0VSG5_CAVPO]	2.64	6	2	2	3	3.49879	1.57	1	1	4.85651	2.64	2	2	1021	118.802	6.55127
A0A086C267	N-acetyl-gamma-glutamyl-phosphate reductase OS=Pseudomonas aeruginosa VRFPA01 GN=argC PE=3 SV=1 - [A0A086C267_PSEAI]	2.62	3	1	1	1	2.35545	2.62	1	1					344	36.7741	6.84424
Q8DXE3	Uncharacterized protein OS=Streptococcus agalactiae serotype V (strain ATCC BAA-611 / 2603 V/R) GN=SAG1908 PE=4 SV=1 - [Q8DXE3_STRA5]	2.61	1	1	1	1		0			1.71713	2.61	1	1	499	58.2702	6.27783
Q6PK82	AP3D1 protein (Fragment) OS=Homo sapiens GN=AP3D1 PE=2 SV=1 - [Q6PK82_HUMAN]	2.54	4	1	1	1	0	2.54	1	1					865	98.4762	9.12939
E7FD52	Transcription factor 19 (SC1),-like OS=Danio rerio GN=tcf19l PE=1 SV=1 - [E7FD52_DANRE]	2.52	1	1	1	1					1.96735	2.52	1	1	516	56.7773	8.93896
Q59FL8	Receptor protein-tyrosine kinase (Fragment) OS=Homo sapiens PE=2 SV=1 - [Q59FL8_HUMAN]	2.5	51	2	2	2	3.58455	2.5	2	2					1081	119.874	6.78564
Q0BTS9	ABC transporter ATP-binding protein OS=Granulibacter bethesdensis (strain ATCC BAA-1260 / CGDNIH1) GN=GbCGDNIH1_0875 PE=4 SV=1 - [Q0BTS9_GRABC]	2.49	1	1	1	6	2.04541	2.49	1	2	6.99081	2.49	1	4	563	59.6414	9.59814
B3KNS8	cDNA FLJ30322 fis, clone BRACE2006703, highly similar to Surfeit locus protein 6 OS=Homo sapiens PE=2 SV=1 - [B3KNS8_HUMAN]	2.49	3	1	1	1	1.98863	2.49	1	1		0			361	41.4836	10.5942
A0A086BWU4	Cell division protein ZapE OS=Pseudomonas aeruginosa VRFPA01 GN=zapE PE=3 SV=1 - [A0A086BWU4_PSEAI]	2.47	2	1	1	2	0	2.47	1	1	0	2.47	1	1	364	41.9366	6.22705
H2R4Y6	Filamin C, gamma OS=Pan troglodytes GN=LOC463711 PE=2 SV=1 - [H2R4Y6_PANTR]	2.46	11	1	6	10	13.1333	1.91	4	5	13.1886	1.58	4	5	2725	290.836	5.96045
H2QA20	Uncharacterized protein OS=Pan troglodytes PE=3 SV=1 - [H2QA20_PANTR]	2.45	5	1	1	1					2.16977	2.45	1	1	774	89.013	5.71924
H2QDH6	Coilin OS=Pan troglodytes GN=COIL PE=2 SV=1 - [H2QDH6_PANTR]	2.43	2	1	1	1					1.83632	2.43	1	1	576	62.6441	9.26123
H0VG32	Uncharacterized protein OS=Cavia porcellus PE=4 SV=1 - [H0VG32_CAVPO]	2.41	5	2	2	2		0			4.53517	2.41	2	2	912	103.064	5.38916
H0UZX1	Uncharacterized protein OS=Cavia porcellus GN=HDHD5 PE=4 SV=1 - [H0UZX1_CAVPO]	2.4	5	1	1	2	2.18632	2.4	1	1	2.68124	2.4	1	1	375	41.5043	6.65381
B3KVN0	cDNA FLJ16785 fis, clone NT2RI2015342, highly similar to Solute carrier family 2, facilitated glucose transporter member 1 OS=Homo sapiens PE=2 SV=1 - [B3KVN0_HUMAN]	2.4	10	1	1	1					2.40845	2.4	1	1	416	45.8393	8.60205
A0A086C2L5	Peptide ABC transporter permease OS=Pseudomonas aeruginosa VRFPA01 GN=G039_0304230 PE=4 SV=1 - [A0A086C2L5_PSEAI]	2.38	4	1	1	1	2.48536	2.38	1	1					421	45.6464	9.23193
Q7T2D1	Retinol dehydrogenase 10-B OS=Danio rerio GN=rdh10b PE=2 SV=2 - [RD10B_DANRE]	2.38	3	1	1	1					2.11204	2.38	1	1	336	37.7941	7.78174
A0A0G2J9J6	Uncharacterized protein OS=Emmonsia crescens UAMH 3008 GN=EMCG_01593 PE=4 SV=1 - [A0A0G2J9J6_9EURO]	2.36	6	1	1	2	2.26872	2.36	1	1	2.16415	2.36	1	1	297	34.7115	8.17725
D6RJI4	Protein furry homolog-like OS=Homo sapiens GN=FRYL PE=1 SV=1 - [D6RJI4_HUMAN]	2.34	7	1	1	1	1.78638	2.34	1	1					471	53.5773	8.60205
D3DWL0	Plectin 1, intermediate filament binding protein 500kDa, isoform CRA_b OS=Homo sapiens GN=PLEC1 PE=4 SV=1 - [D3DWL0_HUMAN]	2.33	4	4	4	4		0			10.4332	2.33	4	4	2105	233.975	5.90967
H0YIQ2	YLP motif-containing protein 1 (Fragment) OS=Homo sapiens GN=YLPM1 PE=1 SV=1 - [H0YIQ2_HUMAN]	2.32	10	2	2	5	7.22461	2.32	2	4	2.72964	1.13	1	1	1595	180.174	6.43018
B4DRX6	cDNA FLJ60339, highly similar to Phosphatidylinositol-4-phosphate 3-kinase C2 domain-containing alpha polypeptide (EC 2.7.1.154) OS=Homo sapiens PE=2 SV=1 - [B4DRX6_HUMAN]	2.3	3	1	1	1		0			2.44495	2.3	1	1	652	72.7108	5.88428
H2QAE1	Serine/arginine repetitive matrix 2 OS=Pan troglodytes GN=SRRM2 PE=2 SV=1 - [H2QAE1_PANTR]	2.29	20	4	4	4	12.2779	2.29	4	4		0			2752	299.429	12.0444
Q2GGE6	Argininosuccinate synthase OS=Ehrlichia chaffeensis (strain ATCC CRL-10679 / Arkansas) GN=argG PE=3 SV=1 - [ASSY_EHRCR]	2.29	11	1	1	1					2.03787	2.29	1	1	393	44.1406	6.48096
G1PHQ7	Uncharacterized protein OS=Myotis lucifugus GN=LOC102431213 PE=4 SV=1 - [G1PHQ7_MYOLU]	2.27	4	2	3	15	23.2883	2.27	3	9	14.4045	2.27	3	6	1495	166.211	6.75635
H2Q8V0	Uncharacterized protein OS=Pan troglodytes GN=SERPINA10 PE=3 SV=1 - [H2Q8V0_PANTR]	2.25	3	1	1	1					1.83837	2.25	1	1	444	50.572	6.87354
D5V9Y9	Uncharacterized protein OS=Moraxella catarrhalis (strain BBH18) GN=MCR_0220 PE=4 SV=1 - [D5V9Y9_MORCB]	2.22	1	1	1	1					2.26926	2.22	1	1	541	60.7035	8.82178
A8K849	cDNA FLJ75527, highly similar to Homo sapiens zinc finger RNA binding protein (ZFR), mRNA (Fragment) OS=Homo sapiens PE=2 SV=1 - [A8K849_HUMAN]	2.22	4	1	1	1					2.18255	2.22	1	1	631	66.267	9.33447
B7ZKN7	BLM protein OS=Homo sapiens GN=BLM PE=2 SV=1 - [B7ZKN7_HUMAN]	2.21	11	2	2	2	5.16198	2.21	2	2		0			1042	116.989	8.63135
P02453	Collagen alpha-1(I) chain OS=Bos taurus GN=COL1A1 PE=1 SV=3 - [CO1A1_BOVIN]	2.19	5	2	3	4	10.2685	2.19	3	3	3.96803	1.5	1	1	1463	138.854	5.78271
P01023	Alpha-2-macroglobulin OS=Homo sapiens GN=A2M PE=1 SV=3 - [A2MG_HUMAN]	2.17	8	2	3	14	21.8616	2.17	3	9	12.5356	1.56	2	5	1474	163.188	6.45557
A0A0B8TYT5	Alpha-ketoglutarate transporter OS=Lactobacillus casei GN=IJ11_0210215 PE=4 SV=1 - [A0A0B8TYT5_LACCA]	2.13	5	1	1	1	1.99958	2.13	1	1					422	47.0006	8.85107
B4DRV1	cDNA FLJ51536, highly similar to Protein-glutamine gamma-glutamyltransferase K (EC 2.3.2.13) OS=Homo sapiens PE=2 SV=1 - [B4DRV1_HUMAN]	2.13	8	1	1	1					1.91359	2.13	1	1	751	82.3046	5.99854
Q4R3Q0	Testis cDNA clone: QtsA-15330, similar to human coatomer protein complex, subunit alpha (COPA) OS=Macaca fascicularis PE=2 SV=1 - [Q4R3Q0_MACFA]	2.08	8	1	1	1					2.30335	2.08	1	1	672	76.8554	8.79248
B4DF22	cDNA FLJ55615, highly similar to SWI/SNF-related matrix-associatedactin-dependent regulator of chromatin subfamily C member 2 OS=Homo sapiens PE=2 SV=1 - [B4DF22_HUMAN]	2.06	12	1	1	1		0			2.76715	2.06	1	1	1019	112.143	5.2876
H3BP78	Fanconi anemia group I protein (Fragment) OS=Homo sapiens GN=FANCI PE=1 SV=1 - [H3BP78_HUMAN]	2.02	6	1	1	1	2.90642	2.02	1	1		0			1090	122.867	6.52197
Q7TSX8	Transferrin OS=Marmota monax PE=2 SV=1 - [Q7TSX8_MARMO]	2.02	1	1	1	2	2.76093	2.02	1	1	2.68266	2.02	1	1	694	76.4164	6.84424
I7GMC0	Macaca fascicularis brain cDNA clone: QflA-16484, similar to human SWI/SNF related, matrix associated, actin dependentregulator of chromatin, subfamily a, member 1 (SMARCA1),transcript variant 2, mRNA... OS=Macaca fascicularis PE=2 SV=1 - [I7GMC0_MACFA]	2	24	1	1	1		0			2.32566	2	1	1	500	58.8314	8.95361
A7GZR9	Fumarate reductase, flavoprotein subunit OS=Campylobacter curvus (strain 525.92) GN=frdA PE=4 SV=1 - [A7GZR9_CAMC5]	1.96	1	1	1	1	2.29421	1.96	1	1		0			662	73.2591	6.771
H2QDY0	Uncharacterized protein OS=Pan troglodytes PE=3 SV=1 - [H2QDY0_PANTR]	1.95	6	2	2	2	2.89771	0.97	1	1	2.62074	0.97	1	1	1131	124.24	5.05908
U3GUT4	Ribonucleoside-diphosphate reductase OS=Corynebacterium argentoratense DSM 44202 GN=CARG_08200 PE=3 SV=1 - [U3GUT4_9CORY]	1.95	1	1	1	1	2.85696	1.95	1	1					718	80.8382	5.47803
G1PJQ9	E3 ubiquitin-protein ligase RNF168 OS=Myotis lucifugus GN=RNF168 PE=3 SV=1 - [G1PJQ9_MYOLU]	1.93	4	1	1	1	2.35034	1.93	1	1		0			571	65.5634	7.44482
P49792	E3 SUMO-protein ligase RanBP2 OS=Homo sapiens GN=RANBP2 PE=1 SV=2 - [RBP2_HUMAN]	1.92	15	4	4	4	4.59732	1.02	2	2	4.8041	0.9	2	2	3224	357.974	6.20166
H2R209	Uncharacterized protein OS=Pan troglodytes GN=XRCC6 PE=4 SV=1 - [H2R209_PANTR]	1.92	7	1	1	1	1.83627	1.92	1	1					574	65.7791	7.50342
Q5CZB5	Putative uncharacterized protein DKFZp686M0430 OS=Homo sapiens GN=DKFZp686M0430 PE=2 SV=1 - [Q5CZB5_HUMAN]	1.9	2	1	1	1					2.80606	1.9	1	1	1157	125.01	4.48779
A0A0G2I954	Uncharacterized protein OS=Emmonsia crescens UAMH 3008 GN=EMCG_07224 PE=4 SV=1 - [A0A0G2I954_9EURO]	1.9	1	1	1	1					1.67944	1.9	1	1	421	47.5278	5.59229
G1TQ32	Uncharacterized protein OS=Oryctolagus cuniculus GN=SCAF8 PE=4 SV=2 - [G1TQ32_RABIT]	1.89	23	2	2	2	5.33421	1.89	2	2					1268	139.782	8.41162
H0VNJ5	Uncharacterized protein OS=Cavia porcellus GN=DDB2 PE=4 SV=1 - [H0VNJ5_CAVPO]	1.89	4	1	1	1					2.38639	1.89	1	1	423	46.8671	9.64209
W1MGN1	Ribonuclease E OS=Pseudomonas aeruginosa VRFPA03 GN=rne PE=3 SV=1 - [W1MGN1_PSEAI]	1.86	3	1	1	1	2.06627	1.86	1	1					916	99.951	4.77979
F8W419	Erythrocyte membrane protein band 4.1-like 4B (Fragment) OS=Danio rerio GN=epb41l4b PE=4 SV=1 - [F8W419_DANRE]	1.86	22	1	1	1	2.07872	1.86	1	1		0			431	49.8101	9.01221
A8K1E1	cDNA FLJ75589, highly similar to Homo sapiens mutS homolog 3 (E. coli) (MSH3), mRNA OS=Homo sapiens PE=2 SV=1 - [A8K1E1_HUMAN]	1.86	1	1	1	1					0	1.86	1	1	1128	126.685	8.08936
A0A024L1E0	NADH-quinone oxidoreductase subunit C/D OS=Escherichia coli GN=nuoD PE=3 SV=1 - [A0A024L1E0_ECOLX]	1.85	5	1	1	1	1.99759	1.85	1	1					596	68.1925	6.41748
W1MKD9	Alpha-1,4 glucan phosphorylase OS=Pseudomonas aeruginosa VRFPA03 GN=M770_15220 PE=3 SV=1 - [W1MKD9_PSEAI]	1.85	3	1	1	1		0			2.69381	1.85	1	1	812	91.9104	5.8208
H2QEE1	Uncharacterized protein OS=Pan troglodytes GN=DSC1 PE=4 SV=1 - [H2QEE1_PANTR]	1.79	4	1	1	10	16.3619	1.79	1	5	13.129	1.79	1	5	840	93.8232	5.73193
A0A0P0FRG9	Uncharacterized protein OS=Bacteroides thetaiotaomicron GN=Btheta7330_03087 PE=4 SV=1 - [A0A0P0FRG9_BACT4]	1.79	2	1	1	1	0	1.79	1	1		0			896	102.791	9.36377
B4DZE1	cDNA FLJ53944, highly similar to Eukaryotic translation initiation factor 4 gamma 3 OS=Homo sapiens PE=2 SV=1 - [B4DZE1_HUMAN]	1.77	18	1	2	3					5.98545	1.77	2	3	1075	121.486	5.90967
I3L1L3	Myb-binding protein 1A (Fragment) OS=Homo sapiens GN=MYBBP1A PE=1 SV=1 - [I3L1L3_HUMAN]	1.76	5	2	2	2		0			5.52318	1.76	2	2	1252	140.154	9.26123
H2Q2I8	Programmed cell death 11 OS=Pan troglodytes GN=PDCD11 PE=2 SV=1 - [H2Q2I8_PANTR]	1.76	3	2	2	2	2.04041	0.96	1	1	3.89855	0.8	1	1	1871	208.666	8.88037
K9J6B8	Putative nucleoporin (Fragment) OS=Desmodus rotundus PE=2 SV=1 - [K9J6B8_DESRO]	1.71	7	2	2	2	0	1.06	1	1	2.68115	0.65	1	1	1697	189.998	6.68311
G4VC53	Putative uncharacterized protein OS=Schistosoma mansoni GN=Smp_128800 PE=4 SV=1 - [G4VC53_SCHMA]	1.69	1	1	1	1	2.01901	1.69	1	1		0			413	48.2928	8.79248
Q16610	Extracellular matrix protein 1 OS=Homo sapiens GN=ECM1 PE=1 SV=2 - [ECM1_HUMAN]	1.67	1	1	1	1	1.92398	1.67	1	1					540	60.6353	6.7124
J3KTL8	Structural maintenance of chromosomes flexible hinge domain-containing protein 1 (Fragment) OS=Homo sapiens GN=SMCHD1 PE=1 SV=1 - [J3KTL8_HUMAN]	1.66	7	2	2	2	2.70246	0.94	1	1	2.40569	0.72	1	1	1388	155.549	8.01611
Q6ZVL3	cDNA FLJ42424 fis, clone BLADE2004089, moderately similar to Mus musculus PDZ domain actin binding protein Shroom mRNA (Fragment) OS=Homo sapiens PE=2 SV=1 - [Q6ZVL3_HUMAN]	1.61	5	1	1	1					3.24407	1.61	1	1	809	87.8048	9.49561
E9PR16	Nuclear pore complex protein Nup160 (Fragment) OS=Homo sapiens GN=NUP160 PE=1 SV=2 - [E9PR16_HUMAN]	1.6	4	1	1	2	2.21599	1.6	1	1	2.19798	1.6	1	1	1123	127.357	5.42725
E2IT82	Gag polyprotein OS=Human immunodeficiency virus 1 GN=gag PE=3 SV=1 - [E2IT82_9HIV1]	1.6	1	1	1	1					1.74102	1.6	1	1	499	55.8311	8.646
Q53T09	Putative uncharacterized protein XRCC5 (Fragment) OS=Homo sapiens GN=XRCC5 PE=4 SV=1 - [Q53T09_HUMAN]	1.58	4	1	1	1					1.8061	1.58	1	1	568	64.2029	5.99854
A4H3J5	Putative long chain fatty Acyl CoA synthetase OS=Leishmania braziliensis GN=LBRM_03_0240 PE=4 SV=2 - [A4H3J5_LEIBR]	1.56	1	1	1	1		0			1.8198	1.56	1	1	704	79.2102	7.44482
A0A060S599	Delta-aminolevulinic acid dehydratase OS=Plasmodium reichenowi GN=PBGS PE=3 SV=1 - [A0A060S599_PLARE]	1.55	5	1	1	1		0			2.57398	1.55	1	1	451	52.941	8.25049
B4DIP7	cDNA FLJ57114, highly similar to Niemann-Pick C1 protein OS=Homo sapiens PE=2 SV=1 - [B4DIP7_HUMAN]	1.55	11	1	1	1					3.01878	1.55	1	1	776	86.3018	4.93213
H0VWE0	Uncharacterized protein OS=Cavia porcellus GN=CAMSAP3 PE=3 SV=1 - [H0VWE0_CAVPO]	1.53	2	1	1	2	2.8929	1.53	1	1	1.81776	1.53	1	1	1175	126.699	8.51416
B4E215	cDNA FLJ55442, highly similar to Ubiquitin-protein ligase E3 component N-recognin-2 (EC 6.-.-.-) OS=Homo sapiens PE=2 SV=1 - [B4E215_HUMAN]	1.5	3	1	1	1		0			2.85241	1.5	1	1	1400	160.127	6.53662
G1SIZ4	Uncharacterized protein OS=Oryctolagus cuniculus GN=NUP153 PE=4 SV=2 - [G1SIZ4_RABIT]	1.49	7	2	2	2		0			4.4121	1.49	2	2	1473	153.939	8.89502
G1P2F5	Uncharacterized protein OS=Myotis lucifugus GN=AFP PE=3 SV=1 - [G1P2F5_MYOLU]	1.48	1	1	1	1		0			2.1935	1.48	1	1	609	68.51	6.01123
C4JLA0	Uncharacterized protein OS=Uncinocarpus reesii (strain UAMH 1704) GN=UREG_03608 PE=4 SV=1 - [C4JLA0_UNCRE]	1.48	1	1	1	3					5.48426	1.48	1	3	609	67.9495	9.86182
B3KVJ5	cDNA FLJ16648 fis, clone TESTI4035508, highly similar to Structural maintenance of chromosomes 4-like 1 protein OS=Homo sapiens PE=2 SV=1 - [B3KVJ5_HUMAN]	1.47	7	1	1	1					2.90203	1.47	1	1	883	101.012	7.07861
K9IPD8	Uncharacterized protein OS=Desmodus rotundus PE=2 SV=1 - [K9IPD8_DESRO]	1.39	7	1	1	1					2.43292	1.39	1	1	937	105.682	8.47021
W6KC40	Uncharacterized protein OS=Phytomonas sp. isolate EM1 GN=GSEM1_T00000100001 PE=4 SV=1 - [W6KC40_9TRYP]	1.32	1	1	1	1		0			0	1.32	1	1	1435	159.911	8.01611
A0A0C2FBU5	Ran-binding protein OS=Sporothrix brasiliensis 5110 GN=SPBR_06455 PE=4 SV=1 - [A0A0C2FBU5_9PEZI]	1.29	1	1	1	1		0			2.52338	1.29	1	1	776	81.7621	5.94775
Q9UGU0	Transcription factor 20 OS=Homo sapiens GN=TCF20 PE=1 SV=3 - [TCF20_HUMAN]	1.28	3	1	1	1		0			2.11487	1.28	1	1	1960	211.641	9.0415
O08677	Kininogen-1 OS=Mus musculus GN=Kng1 PE=1 SV=1 - [KNG1_MOUSE]	1.21	1	1	1	1	0	1.21	1	1		0			661	73.0564	6.53662
G1P2P0	DNA polymerase OS=Myotis lucifugus GN=POLA1 PE=3 SV=1 - [G1P2P0_MYOLU]	1.19	6	1	1	1		0			3.08243	1.19	1	1	1350	152.8	5.88428
A0A024R468	Chondroitin polymerizing factor, isoform CRA_d OS=Homo sapiens GN=CHPF PE=4 SV=1 - [A0A024R468_HUMAN]	1.17	3	1	1	1	1.89589	1.17	1	1					1025	113.174	5.65576
B4E3M6	cDNA FLJ55446, highly similar to Superkiller viralicidic activity 2-like 2 (EC 3.6.1.-) OS=Homo sapiens PE=2 SV=1 - [B4E3M6_HUMAN]	1.17	8	1	1	1		0			1.8175	1.17	1	1	941	106.688	7.13721
B4E0J9	cDNA FLJ57348, highly similar to Homo sapiens hexokinase domain containing 1 (HKDC1), mRNA OS=Homo sapiens PE=2 SV=1 - [B4E0J9_HUMAN]	1.15	5	1	1	1	1.9711	1.15	1	1		0			780	86.6425	7.45947
W6KST3	Uncharacterized protein OS=Phytomonas sp. isolate EM1 GN=GSEM1_T00004230001 PE=4 SV=1 - [W6KST3_9TRYP]	1.14	1	1	1	7	0	1.14	1	1	0	1.14	1	6	702	78.3578	6.93213
Q659F1	Putative uncharacterized protein DKFZp434K213 (Fragment) OS=Homo sapiens GN=DKFZp434K213 PE=2 SV=1 - [Q659F1_HUMAN]	1.13	19	1	1	1		0			2.9173	1.13	1	1	1059	120.817	6.26514
Q4R8S4	Testis cDNA clone: QtsA-11594, similar to human splicing factor, arginine/serine-rich 14 (SFRS14) OS=Macaca fascicularis PE=2 SV=1 - [Q4R8S4_MACFA]	1.13	8	1	1	2	2.03785	1.13	1	1	1.78975	1.13	1	1	711	79.6471	9.21729
K9INZ0	Putative rhoa gtpase effector dia/diaphanous OS=Desmodus rotundus PE=2 SV=1 - [K9INZ0_DESRO]	1.11	7	1	1	1	2.41931	1.11	1	1					1175	124.544	5.50342
B4DQZ7	cDNA FLJ50838, highly similar to Apoptotic chromatin condensation inducer in thenucleus (Fragment) OS=Homo sapiens PE=2 SV=1 - [B4DQZ7_HUMAN]	1.09	5	1	1	1					3.20099	1.09	1	1	1096	122.485	5.65576
A0A1W0B850	NAD-glutamate dehydrogenase (Fragment) OS=Nocardia donostiensis GN=B0T46_23605 PE=4 SV=1 - [A0A1W0B850_9NOCA]	1.08	10	1	1	1					2.06062	1.08	1	1	837	92.1934	5.13525
O35802	Inter-alpha-inhibitor H4 heavy chain OS=Rattus norvegicus GN=ITIH4 PE=2 SV=1 - [O35802_RAT]	1.07	1	1	1	1	1.88699	1.07	1	1					932	103.543	6.50732
G1TTN6	Uncharacterized protein OS=Oryctolagus cuniculus GN=STON2 PE=4 SV=2 - [G1TTN6_RABIT]	1.01	7	1	1	2	2.22178	1.01	1	1	2.33858	1.01	1	1	891	99.5149	5.49072
Q6ZMY0	cDNA FLJ16598 fis, clone TESTI4006473, weakly similar to ATP-dependent RNA helicase A OS=Homo sapiens PE=2 SV=1 - [Q6ZMY0_HUMAN]	0.97	5	1	1	1					2.90734	0.97	1	1	1340	150.875	8.22119
G1TR31	Uncharacterized protein OS=Oryctolagus cuniculus GN=PZP PE=4 SV=2 - [G1TR31_RABIT]	0.89	1	1	1	8	11.8882	0.89	1	4	11.6004	0.89	1	4	1463	162.226	6.93213
A0A1B8T0V9	2-oxoglutarate dehydrogenase E1 component OS=Pseudomonas sp. AU12215 GN=A9513_034000 PE=4 SV=1 - [A0A1B8T0V9_9PSED]	0.85	3	1	1	1	1.69485	0.85	1	1					943	105.973	6.49365
G1SES4	Uncharacterized protein OS=Oryctolagus cuniculus GN=HCFC1 PE=4 SV=2 - [G1SES4_RABIT]	0.83	8	1	1	1					2.05821	0.83	1	1	1933	198.248	7.38623
A0A1B8V2U5	Efflux pump membrane transporter OS=Pseudomonas sp. AU11447 GN=A6723_011695 PE=3 SV=1 - [A0A1B8V2U5_9PSED]	0.76	1	1	1	1	0	0.76	1	1					1050	113.608	5.22412
A5K7X5	Isoleucyl-tRNA synthetase, putative OS=Plasmodium vivax (strain Salvador I) GN=PVX_082575 PE=3 SV=1 - [A5K7X5_PLAVS]	0.75	1	1	1	1		0			2.41316	0.75	1	1	1206	139.583	8.00146
G1PPH1	Uncharacterized protein OS=Myotis lucifugus PE=4 SV=1 - [G1PPH1_MYOLU]	0.67	1	1	1	1	2.45897	0.67	1	1		0			1489	166.196	7.40088
E0VV67	Testis development protein nyd-sp29, putative OS=Pediculus humanus subsp. corporis GN=8230952 PE=4 SV=1 - [E0VV67_PEDHC]	0.65	1	1	1	4	5.16665	0.65	1	2	4.7675	0.65	1	2	1240	144	5.57959
A0A151LMH1	E3 ubiquitin-protein ligase, putative (Fragment) OS=Plasmodium reichenowi GN=PRSY57_0702800 PE=4 SV=1 - [A0A151LMH1_PLARE]	0.65	2	1	1	1		0			0	0.65	1	1	3673	435.05	6.49365
H2Q003	Uncharacterized protein OS=Pan troglodytes PE=4 SV=1 - [H2Q003_PANTR]	0.62	2	1	1	7	9.49429	0.62	1	3	11.8033	0.62	1	4	1782	183.73	8.79248
A0A1B8THW8	NAD-glutamate dehydrogenase OS=Pseudomonas sp. AU12215 GN=A9513_008915 PE=4 SV=1 - [A0A1B8THW8_9PSED]	0.56	2	1	1	1	1.92195	0.56	1	1		0			1620	182.082	5.8208
F5HSE3	Nipped-B-like protein A OS=Danio rerio GN=nipbla PE=2 SV=1 - [NIPLA_DANRE]	0.55	17	1	1	1		0			3.20064	0.55	1	1	2381	267.956	6.85889
A4I473	Uncharacterized protein OS=Leishmania infantum GN=LINJ_29_0210 PE=4 SV=1 - [A4I473_LEIIN]	0.51	2	1	1	1		0			2.0139	0.51	1	1	1581	174.081	6.91748
G1PIK5	Uncharacterized protein OS=Myotis lucifugus GN=TLN1 PE=4 SV=1 - [G1PIK5_MYOLU]	0.51	7	1	1	1		0			2.12874	0.51	1	1	2159	228.751	5.97314
G4V7M6	Putative zinc finger protein OS=Schistosoma mansoni GN=Smp_165420 PE=4 SV=1 - [G4V7M6_SCHMA]	0.48	1	1	1	1	2.6906	0.48	1	1		0			3936	443.733	7.40088
H2QKR6	Uncharacterized protein OS=Pan troglodytes GN=DIDO1 PE=4 SV=1 - [H2QKR6_PANTR]	0.4	2	1	1	1	2.51543	0.4	1	1		0			2229	242.26	7.81104
