# Supplementary material for: Loss function of tumor suppressor FRMD8 confers resistance to tamoxifen therapy via a dual mechanism
Source: eLife. 2025 Apr 11;13:RP101888. doi: 10.7554/eLife.101888 (PMC11991697; doi:10.7554/eLife.101888)
Supplement: Supplementary file 3. [file elife-101888-supp3.xlsx]

## Sheet: Sheet1
Supplementary file 3. Patient information of tissue microarray
Tissue code	Gender	Age	Tumor location	Pathologic classification	Primary or metastasis	TNM category			AJCC stage	Pathologic stage	State of survival	Survival time (month)	Expression of FRMD8	Expression of ERα
J07A0929	Female	48	Breast	Invasive ductal carcinoma	Primary	T2	N0	M0	2A	Ⅱ	Alive	150	2	Positive
J07A0930	Female	60	Breast	Invasive ductal carcinoma	Primary	T2	N0	M0	2A	Ⅱ	Alive	150	2	Positive
J07A0933	Female	47	Breast	Invasive ductal carcinoma	Primary	T3	N2	M0	3A	Ⅰ-Ⅱ	Dead	32	1	Positive
J07A0934	Female	37	Breast	Invasive ductal carcinoma	Primary	T2	N0	M0	2A	Ⅱ	Alive	149	2	Positive
J07A0935	Female	54	Breast	Invasive ductal carcinoma	Primary	T3	N1	M0	3A	Ⅱ	Alive	148	0	Negative
J07A0936	Female	72	Breast	Invasive ductal carcinoma	Primary	T2	N0	M0	2A	Ⅰ-Ⅱ	Alive	148	1	Positive
J07A0937	Female	31	Breast	Invasive ductal carcinoma with Invasive lobular carcinoma	Primary	T2	N0	M0	2A	Ⅰ-Ⅱ	Dead	147	1	Positive
J07A0939	Female	50	Breast	Invasive ductal carcinoma	Primary	T3	N3	M0	3C	Ⅱ	Alive	147	3	Negative
J07A0940	Female	57	Breast	Invasive ductal carcinoma	Primary	T2	N2	M0	3A	Ⅰ-Ⅱ	Alive	147	2	Positive
J07A0941	Female	52	Breast	Invasive ductal carcinoma with Invasive lobular carcinoma and apocrine carcinoma	Primary	T2	N1	M0	2B	Ⅰ	Alive	147	1	Positive
J07A0942	Female	76	Breast	Invasive ductal carcinoma	Primary	T2	N0	M0	2A	Ⅱ	Dead	33	1	Negative
J07A0943	Female	63	Breast	Invasive ductal carcinoma	Primary	T1	N0	M0	1	Ⅱ	Alive	146	1	Positive
J07A0945	Female	82	Breast	Invasive ductal carcinoma	Primary	T2	N0	M0	2A	Ⅱ	Dead	54	1	Negative
J07A0946	Female	48	Breast	Invasive ductal carcinoma	Primary	T3	N2	M0	3A	Ⅰ	Alive	145	1	Negative
J07A0947	Female	37	Breast	Invasive ductal carcinoma	Primary	T2	N0	M0	2A	Ⅱ-Ⅲ	Dead	93	1	Weakly positive
J07A0951	Female	34	Breast	Invasive ductal carcinoma	Primary	T1	N0	M0	1	Ⅱ	Alive	145	2	Positive
J07A0952	Female	73	Breast	Invasive ductal carcinoma with invasive lobular carcinoma	Primary	T2	N2	M0	3A	Ⅱ-Ⅲ	Dead	114	1	Positive
J07A0956	Female	54	Breast	Invasive ductal carcinoma	Primary	T2	N0	M0	2A	Ⅱ	Dead	97	1	Negative
J07A0957	Female	56	Breast	Invasive ductal carcinoma	Primary	T2	N0	M0	2A	Ⅱ	Alive	144	2	Positive
J07A0958	Female	82	Breast	Invasive ductal carcinoma	Primary	T1	-	M0	-	Ⅱ	Alive	143	2	Positive
J07A0960	Female	72	Breast	Invasive ductal carcinoma	Primary	T2	N2	M0	3A	Ⅱ	Alive	143	2	Negative
J07A0961	Female	33	Breast	Invasive ductal carcinoma	Primary	T2	N2	M0	3A	Ⅱ	Dead	19	1	-
J07A0962	Female	63	Breast	Invasive ductal carcinoma	Primary	T2	N1	M0	2B	Ⅰ-Ⅱ	Alive	143	1	Negative
J07A0963	Female	51	Breast	Invasive ductal carcinoma	Primary	T1	N2	M0	3A	Ⅱ	Dead	18	1	Negative
J07A0964	Female	44	Breast	Invasive ductal carcinoma	Primary	T3	N1	M0	3A	Ⅱ	Dead	17	1	Negative
J07A0965	Female	67	Breast	Invasive ductal carcinoma	Primary	T1	N0	M0	1	Ⅰ-Ⅱ	Alive	143	1	Positive
J07A0966	Female	48	Breast	Invasive ductal carcinoma	Primary	T2	N3	M0	3C	Ⅱ	Dead	11	0	Negative
J07A0968	Female	68	Breast	Invasive ductal carcinoma	Primary	T1	N1	M0	2A	Ⅰ	Dead	82	1	Negative
J07A0969	Female	52	Breast	Invasive ductal carcinoma	Primary	T2	N0	M0	2A	Ⅱ	Alive	142	2	Positive
J07A0970	Female	55	Breast	Invasive ductal carcinoma	Primary	T2	N2	M0	3A	Ⅱ	Alive	142	1	Positive
J07A0973	Female	76	Breast	Invasive ductal carcinoma	Primary	T3	-	M0	-	Ⅰ	Alive	141	1	Positive
J07A0974	Female	72	Breast	Invasive ductal carcinoma	Primary	T1	N1	M0	2A	Ⅰ-Ⅱ	Alive	141	2	Positive
J07A0976	Female	44	Breast	Invasive ductal carcinoma	Primary	T2	N0	M0	2A	Ⅰ-Ⅱ	Alive	141	2	Positive
J07A0977	Female	77	Breast	Invasive ductal carcinoma	Primary	T2	N2	M0	3A	Ⅱ	Alive	141	2	Positive
J07A0978	Female	60	Breast	Invasive ductal carcinoma	Primary	T2	N2	M0	3A	Ⅰ-Ⅱ	Alive	141	1	Positive
J07A0980	Female	44	Breast	Invasive ductal carcinoma	Primary	T2	N1	M0	2B	Ⅱ	Alive	140	2	Positive
J07A0981	Female	38	Breast	Invasive ductal carcinoma	Primary	T2	N2	M0	3A	Ⅰ-Ⅱ	Alive	140	2	Positive
J07A0983	Female	57	Breast	Invasive ductal carcinoma	Primary	T1	N1	M0	2A	Ⅰ-Ⅱ	Alive	139	2	Negative
J07A0985	Female	64	Breast	Invasive ductal carcinoma	Primary	T2	N1	M0	2B	Ⅱ	Alive	138	1	Positive
J07A0986	Female	44	Breast	Invasive ductal carcinoma	Primary	T3	N2	M0	3A	Ⅱ	Alive	138	2	Negative
J07A0987	Female	48	Breast	Invasive ductal carcinoma	Primary	T2	N0	M0	2A	Ⅰ	Dead	32	0	Positive
J07A0988	Female	47	Breast	Invasive ductal carcinoma	Primary	T2	N0	M0	2A	Ⅰ	Alive	138	2	Positive
J07A0989	Female	47	Breast	Invasive ductal carcinoma with invasive lobular carcinoma	Primary	T1	N1	M0	2A	Ⅰ	Alive	137	0	Positive
J07A0990	Female	33	Breast	Invasive ductal carcinoma	Primary	T3	N3	M0	3C	Ⅱ	Alive	137	0	Positive
J07A0991	Female	46	Breast	Invasive ductal carcinoma	Primary	T2	N2	M0	3A	Ⅱ	Dead	7	1	Positive
J07A0992	Female	39	Breast	Invasive ductal carcinoma	Primary	T2	N3	M0	3C	Ⅰ	Alive	137	1	Positive
J07A0993	Female	46	Breast	Invasive ductal carcinoma	Primary	T2	N0	M0	2A	Ⅱ	Alive	137	3	Negative
J07A0994	Female	40	Breast	Invasive ductal carcinoma	Primary	T1	N2	M0	3A	Ⅱ	Alive	137	1	Positive
J07A0997	Female	61	Breast	Invasive ductal carcinoma	Primary	T2	N0	M0	2A	Ⅱ	Alive	136	1	Positive
J07A0998	Female	61	Breast	Invasive ductal carcinoma	Primary	T1	N1	M0	2A	Ⅰ	Alive	136	2	Positive
J07A0999	Female	48	Breast	Invasive ductal carcinoma	Primary	T2	N2	M0	3A	Ⅱ	Dead	125	1	-
J07A1000	Female	40	Breast	Invasive ductal carcinoma	Primary	T2	N1	M0	2B	Ⅰ	Dead	23	1	Negative
J07A1001	Female	62	Breast	Invasive ductal carcinoma	Primary	T2	N1	M0	2B	Ⅰ-Ⅱ	Alive	135	1	Negative
J07A1003	Female	36	Breast	Invasive ductal carcinoma	Primary	T1	N2	M0	3A	Ⅱ	Alive	135	3	Positive
J07A1004	Female	38	Breast	Invasive ductal carcinoma	Primary	T3	N1	M0	3A	Ⅰ-Ⅱ	Alive	135	2	Positive
J07A1006	Female	73	Breast	Invasive ductal carcinoma	Primary	T2	N1	M0	2B	Ⅰ-Ⅱ	Alive	135	2	Negative
J07A1007	Female	45	Breast	Invasive ductal carcinoma	Primary	T1	N1	M0	2A	Ⅰ-Ⅱ	Dead	47	1	Negative
J07A1010	Female	76	Breast	Invasive ductal carcinoma	Primary	T2	N0	M0	2A	Ⅱ	Dead	77	3	Negative
J07A1011	Female	47	Breast	Invasive ductal carcinoma	Primary	T2	N1	M0	2B	Ⅱ	Alive	134	2	Positive
J07A1012	Female	61	Breast	Invasive ductal carcinoma	Primary	T2	N1	M0	2B	Ⅱ	Alive	134	1	Positive
J07A1013	Female	78	Breast	Invasive ductal carcinoma	Primary	T2	N0	M0	2A	Ⅱ	Dead	92	2	Positive
J07A1014	Female	55	Breast	Invasive ductal carcinoma	Primary	T2	N1	M0	2B	Ⅰ	Dead	31	2	Positive
J07A1015	Female	50	Breast	Invasive ductal carcinoma	Primary	T2	N3	M0	3C	Ⅱ	Dead	78	1	-
J07A1017	Female	66	Breast	Invasive ductal carcinoma	Primary	T2	N0	M0	2A	Ⅱ	Alive	133	2	Positive
J07A1019	Female	48	Breast	Invasive ductal carcinoma	Primary	T2	N0	M0	2A	Ⅰ-Ⅱ	Alive	132	2	Positive
J07A1020	Female	41	Breast	Invasive ductal carcinoma with invasive lobular carcinoma	Primary	T1	N0	M0	1	Ⅱ	Alive	132	2	Positive
J07A1021	Female	51	Breast	Invasive ductal carcinoma	Primary	T2	N0	M0	2A	Ⅱ	Alive	132	1	Positive
J07A1022	Female	45	Breast	Invasive ductal carcinoma	Primary	T2	N0	M0	2A	Ⅱ	Alive	132	2	Positive
J07A1023	Female	75	Breast	Invasive ductal carcinoma	Primary	T2	N2	M0	3A	Ⅱ-Ⅲ	Dead	53	2	Positive
J07A1024	Female	47	Breast	Invasive ductal carcinoma	Primary	T2	N0	M0	2A	Ⅱ	Alive	131	2	Positive
J07A1026	Female	56	Breast	Invasive ductal carcinoma	Primary	T2	N1	M0	2B	Ⅱ	Alive	131	1	Positive
J07A1028	Female	74	Breast	Invasive ductal carcinoma	Primary	T3	N2	M0	3A	Ⅰ-Ⅱ	Dead	23	1	Positive
J07A1030	Female	50	Breast	Invasive ductal carcinoma	Primary	T1	N2	M0	3A	Ⅰ-Ⅱ	Alive	130	2	Positive
J07A1031	Female	72	Breast	Invasive ductal carcinoma	Primary	T2	N1	M0	2B	Ⅱ	Alive	130	2	Positive
J07A1032	Female	36	Breast	Invasive ductal carcinoma	Primary	T2	N3	M0	3C	Ⅱ	Dead	15	3	Negative
J07A1033	Female	46	Breast	Invasive ductal carcinoma	Primary	T2	N1	M0	2B	Ⅰ	Alive	129	2	Positive
J07A1034	Female	54	Breast	Invasive ductal carcinoma	Primary	T2	N0	M0	2A	Ⅱ	Dead	60	3	Positive
J07A1036	Female	63	Breast	Invasive ductal carcinoma	Primary	T2	N1	M0	2B	Ⅱ-Ⅲ	Dead	110	1	Positive
J07A1038	Female	50	Breast	Invasive ductal carcinoma	Primary	T2	N1	M0	2B	Ⅱ	Alive	128	3	Positive
J07A1040	Female	53	Breast	Invasive ductal carcinoma	Primary	T2	N2	M0	3A	Ⅱ	Dead	63	2	Positive
J07A1041	Female	63	Breast	Invasive ductal carcinoma	Primary	T1	N1	M0	2A	Ⅱ	Dead	35	2	Negative
J07A1043	Female	37	Breast	Invasive ductal carcinoma	Primary	T1	N3	M0	3C	Ⅱ	Alive	128	3	Positive
J07A1045	Female	55	Breast	Invasive ductal carcinoma	Primary	T2	N1	M0	2B	Ⅱ	Alive	128	2	Positive
J07A1046	Female	40	Breast	Invasive ductal carcinoma	Primary	T2	N0	M0	2A	Ⅰ-Ⅱ	Dead	44	2	Positive
J07A1047	Female	29	Breast	Invasive ductal carcinoma	Primary	T2	N2	M0	3A	Ⅱ	Dead	78	1	Negative
J07A1052	Female	45	Breast	Invasive ductal carcinoma	Primary	T2	N1	M0	2B	Ⅱ	Alive	127	1	Positive
J07A1053	Female	31	Breast	Invasive ductal carcinoma	Primary	T3	N2	M0	3A	Ⅱ	Dead	4	2	Negative
J07A1055	Female	54	Breast	Invasive ductal carcinoma	Primary	T2	N2	M0	3A	Ⅲ	Dead	4	2	Positive
J07A1057	Female	48	Breast	Invasive ductal carcinoma	Primary	T2	N1	M0	2B	Ⅱ	Alive	126	2	Positive
J07A1059	Female	71	Breast	Invasive ductal carcinoma	Primary	T2	N0	M0	2A	Ⅱ	Dead	62	2	Negative
J07A1060	Female	49	Breast	Invasive ductal carcinoma	Primary	T2	N0	M0	2A	Ⅱ	Alive	120	2	Negative
J07A1061	Female	69	Breast	Invasive ductal carcinoma	Primary	T2	N1	M0	2B	Ⅱ	Alive	120	2	Positive
J07A1062	Female	46	Breast	Invasive ductal carcinoma	Primary	T1	N1	M0	2A	Ⅱ	Alive	119	3	Negative
J07A1065	Female	48	Breast	Invasive ductal carcinoma	Primary	T2	N1	M0	2B	Ⅱ-Ⅲ	Dead	19	1	-
J07A1067	Female	82	Breast	Invasive ductal carcinoma	Primary	T3	N2	M0	3A	Ⅱ	Dead	2	1	Negative
J07A1068	Female	52	Breast	Invasive ductal carcinoma	Primary	T2	N2	M0	3A	Ⅱ	Dead	110	2	Negative
J07A1070	Female	44	Breast	Invasive ductal carcinoma	Primary	T2	N2	M0	3A	Ⅱ	Alive	118	1	Positive
J07A1073	Female	51	Breast	Invasive ductal carcinoma	Primary	T2	N0	M0	2A	Ⅱ	Alive	118	2	Positive
J07A1074	Female	43	Breast	Invasive ductal carcinoma	Primary	T3	N2	M0	3A	Ⅱ	Alive	117	1	Negative
J07A1076	Female	37	Breast	Invasive ductal carcinoma	Primary	T1	N0	M0	1	Ⅱ-Ⅲ	Dead	85	3	Weakly positive
J07A1080	Female	65	Breast	Invasive ductal carcinoma	Primary	T1	N0	M0	1A		Alive	115	1	-
J07A1081	Female	51	Breast	Invasive ductal carcinoma with invasive lobular carcinoma	Primary	T2	N0	M0	2A	Ⅰ-Ⅱ	Alive	115	1	Positive
J07A1083	Female	40	Breast	Invasive ductal carcinoma	Primary	T2	N0	M0	2A	-	Alive	115	0	-
J07A1084	Female	64	Breast	Invasive ductal carcinoma	Primary	T2	N0	M0	2A	Ⅱ	Dead	68	2	Negative
J07A1085	Female	52	Breast	Invasive ductal carcinoma	Primary	T2	N3	M0	3C	Ⅱ	Dead	61	1	Positive
J07A1086	Female	66	Breast	Invasive ductal carcinoma	Primary	T1	N1	M0	2A	Ⅱ-Ⅲ	Alive	115	2	-
J07A1087	Female	68	Breast	Invasive ductal carcinoma	Primary	T2	N1	M0	2B	Ⅱ	Alive	115	0	Negative
J07A1088	Female	39	Breast	Invasive ductal carcinoma	Primary	T2	N2	M0	3A	Ⅱ	Alive	114	1	Negative
J07A1090	Female	41	Breast	Invasive ductal carcinoma	Primary	T2	N1	M0	2B	Ⅰ-Ⅱ	Alive	114	2	Negative
J07A1093	Female	61	Breast	Invasive ductal carcinoma	Primary	T2	N0	M0	2A	Ⅱ	Alive	113	1	Positive
J07A1095	Female	65	Breast	Invasive ductal carcinoma	Primary	T2	N0	M0	2A	Ⅱ	Alive	112	1	Positive
J07A1096	Female	60	Breast	Invasive ductal carcinoma	Primary	T2	N0	M0	2A	Ⅱ	Alive	112	1	Positive
J07A1097	Female	50	Breast	Invasive ductal carcinoma	Primary	T2	N2	M0	3A	Ⅱ	Alive	112	3	Negative
J07A1098	Female	42	Breast	Invasive ductal carcinoma	Primary	T2	N1	M0	2B	Ⅱ	Alive	112	1	Negative
J07A1099	Female	40	Breast	Invasive ductal carcinoma	Primary	T2	N0	M0	2A	Ⅱ	Alive	112	2	Positive
J07A1100	Female	40	Breast	Invasive ductal carcinoma	Primary	T2	N0	M0	2A	Ⅱ	Alive	112	2	Weakly positive
J07A1101	Female	57	Breast	Invasive ductal carcinoma	Primary	T1	N0	M0	1	Ⅰ-Ⅱ	Alive	111	3	Positive
J07A1102	Female	47	Breast	Invasive ductal carcinoma	Primary	T2	N0	M0	2A	Ⅱ	Alive	111	0	Positive
J07A1103	Female	67	Breast	Invasive ductal carcinoma	Primary	T2	N1	M0	2B	Ⅱ	Alive	111	1	Positive
J07A1106	Female	46	Breast	Invasive ductal carcinoma	Primary	T2	N2	M0	3A	Ⅱ	Alive	111	1	Positive
J07A1107	Female	34	Breast	Invasive ductal carcinoma	Primary	T2	N1	M0	2B	Ⅱ	Alive	110	2	Positive
J07A1108	Female	42	Breast	Cribriform carcinoma	Primary	T2	N0	M0	2A	Ⅱ	Alive	110	1	-
J07A1109	Female	73	Breast	Invasive ductal carcinoma	Primary	T1	N2	M0	3A	Ⅱ	Dead	79	1	Positive
J07A1110	Female	56	Breast	Invasive ductal carcinoma with invasive lobular carcinoma	Primary	T2	N2	M0	3A	Ⅱ	Dead	80	1	Positive
J07A1111	Female	59	Breast	Invasive ductal carcinoma	Primary	T1	N0	M0	1	Ⅱ	Alive	110	2	Negative
J07A1113	Female	53	Breast	Invasive ductal carcinoma	Primary	T1	N0	M0	1	Ⅱ	Alive	110	1	Positive
J07A1115	Female	72	Breast	Invasive ductal carcinoma	Primary	T1	N1	M0	2A	Ⅱ	Dead	46	0	Negative
J07A1117	Female	39	Breast	Mucinous carcinoma	Primary	T2	N0	M0	2A	-	Alive	109	2	-
J07A1118	Female	52	Breast	Invasive ductal carcinoma	Primary	T2	N1	M0	2B	Ⅱ	Alive	109	1	Positive
J07A1120	Female	75	Breast	Invasive ductal carcinoma	Primary	T2	N1	M0	2B	Ⅱ	Dead	59	1	Positive
J07A1121	Female	33	Breast	Invasive ductal carcinoma	Primary	T2	N3	M0	3C	Ⅱ	Alive	109	1	Negative
J07A1122	Female	64	Breast	Invasive ductal carcinoma	Primary	T2	N0	M0	2A	Ⅱ	Alive	109	1	Negative
J07A1124	Female	43	Breast	Invasive ductal carcinoma	Primary	T2	N2	M0	3A	Ⅱ	Alive	109	2	Weakly positive
J07A1125	Female	71	Breast	Invasive ductal carcinoma	Primary	T1	N0	M0	1	Ⅱ	Alive	109	1	Negative
J07A1126	Female	49	Breast	Invasive ductal carcinoma	Primary	T1	N1	M0	2A	Ⅱ	Alive	108	1	Weakly positive
J07A1127	Female	83	Breast	Invasive ductal carcinoma	Primary	T2	N2	M0	3A	Ⅱ	Alive	108	2	Negative
J07A1128	Female	50	Breast	Invasive ductal carcinoma	Primary	T1	N0	M0	1	Ⅱ	Alive	108	0	Negative
J07A1130	Female	54	Breast	Invasive ductal carcinoma	Primary	T3	N2	M0	3A	Ⅱ	Dead	9	3	Positive
J07A1132	Female	42	Breast	Invasive ductal carcinoma	Primary	T1	N1	M0	2A	Ⅱ	Alive	108	2	Positive
J07A1133	Female	51	Breast	Invasive ductal carcinoma	Primary	T2	N0	M0	2A	Ⅱ	Alive	107	2	Positive
